# Supplementary material for: Cyclic AMP is a critical mediator of intrinsic drug resistance and fatty acid metabolism in M. tuberculosis
Source: eLife. 2023 Feb 22;12:e81177. doi: 10.7554/eLife.81177 (PMC9995111; doi:10.7554/eLife.81177)
Supplement: Figure 1—source data 1. — Each antibiotic was tested at three sub-MIC90 concentrations in biological triplicate (Li et al., 2022). [file elife-81177-fig1-data1.xlsx]

## Sheet: Legend
Figure 1 - source data 1
Antibiotic concentrations (nanomolar) used for CRISPRi chemical-genetic interaction screens.
Each antibiotic was tested at three sub-MIC90 concentrations in biological triplicate (Li et al., 2022).

## Sheet: Concentrations (nM)
Antibiotic	Low	Med	High
Vancomycin	252	505	1010
Clarithromycin	13370	26740	53480
Rifampicin	0.8	1.5	3
Bedaquiline	45	90	180
Ethambutol	902	1804	3607
Levofloxacin	138	277	536
Streptomycin	110	221	441
Isoniazid	182	365	730
Linezolid	371	741	1482
Med
High
