# Supplementary material for: Cyclic AMP is a critical mediator of intrinsic drug resistance and fatty acid metabolism in M. tuberculosis
Source: eLife. 2023 Feb 22;12:e81177. doi: 10.7554/eLife.81177 (PMC9995111; doi:10.7554/eLife.81177)
Supplement: Figure 2—source data 1. — Percent uptake values of antibiotics quantified by mass spectrometry in Figure 2C for the indicated strains. Each condition was tested in technical triplicate. NT = non-targeting sgRNA; KD = knockdown; CS = CRISPRi-sensitive; CR = CRISPRi-resistant. [file elife-81177-fig2-data1.xlsx]

## Sheet: Legend
Figure 2 - source data 1
Antibiotic uptake in rv3645 CRISPRi strains.
Percent uptake values of antibiotics quantified by mass spectrometry in Figure 2C for the indicated strains. Each condition was tested in technical triplicate. NT = non-targeting sgRNA; KD = knockdown; CS = CRISPRi-sensitive; CR = CRISPRi-resistant.

## Sheet: Uptake values
Antibiotic	NT			rv3645 KD + rv3645CS			rv3645 KD + rv3645CR
Vancomycin	46.37	49.21	58.65	59.11	53.24	53.26	38.77	50.16	46.99
Linezolid	3.19	7.4	3.03	1.11	16.86	10.82	5.45	16.43	3.15
