# Supplementary material for: Cyclic AMP is a critical mediator of intrinsic drug resistance and fatty acid metabolism in M. tuberculosis
Source: eLife. 2023 Feb 22;12:e81177. doi: 10.7554/eLife.81177 (PMC9995111; doi:10.7554/eLife.81177)
Supplement: Figure 3—figure supplement 2—source data 1. [file elife-81177-fig3-figsupp2-data1.xlsx]

## Sheet: Sheet1
Strain	Slope/Uptake rate	R2
WT	182.2	0.9998
∆rv3645 + EV	676.6	0.991
∆rv3645 + rv3645	228.6	0.9716
rv1339 OE	532.9	0.9903
rv1339(D180A) OE	270.6	0.9717
