# Supplementary material for: Cyclic AMP is a critical mediator of intrinsic drug resistance and fatty acid metabolism in M. tuberculosis
Source: eLife. 2023 Feb 22;12:e81177. doi: 10.7554/eLife.81177 (PMC9995111; doi:10.7554/eLife.81177)
Supplement: Figure 4—source data 1. [file elife-81177-fig4-data1.xlsx]

## Sheet: Legend
Source Data Figure 4: MAGeCK screen results.
Suppressor Hits (tab 2)
Column name	Column description
Gene	Name of the gene
L2FC	Log2 fold change of this gene in positive selection. Calculation performed by --gene-l2fc-method using the alphamedian option
FDR	False discovery rate of this gene in positive selection
MAGeCK Source Data (tab 3)
Column name	Column description
ORF_ID	Unique gene ID
num	Number of sgRNAs targeting the indicated gene
essentiality	Gene essentiality predicted by CRISPRi (PMID: 34297925)
neg | goodsgrna	Number of "good" sgRNAs. I.e. sgRNAs whose rank is below the alpha cutoff (determined by the --gene-test-fdr-threshold option), in negative selection
neg | rank	Ranking of this gene in negative selection
neg | l2fc	Log2 fold change of this gene in negative selection. Calculation performed by --gene-l2fc-method using the alphamedian option
neg | fdr	False discovery rate of this gene in negative selection
pos | goodsgrna	Number of "good" sgRNAs. I.e. sgRNAs whose rank is below the alpha cutoff (determined by the --gene-test-fdr-threshold option), in positive selection
pos | rank	Ranking of this gene in positive selection
pos | l2fc	Log2 fold change of this gene in positive selection. Calculation performed by --gene-l2fc-method using the alphamedian option
pos | fdr	False discovery rate of this gene in positive selection

## Sheet: Suppressor Hits
Gene	L2FC	FDR
rv1339	7.924	0.000198
mce1F	4.9	0.000952
mce1C	4.828	0.000198
mkl/mceG	4.144	0.000198
mce1D	4.002	0.000198
mce1A	3.613	0.000198
mce1B	3.05	0.000198
mce1E	2.859	0.000198
yrbE1B	2.117	0.000198

## Sheet: MAGeCK Source Data
ORF_ID	num	essentiality	neg|goodsgrna	neg|rank	neg|lfc	neg|fdr	neg|rank	pos|goodsgrna	pos|rank	pos|lfc	pos|fdr
16S:16S	101	Essential	10	4053	-4.6301	1	4053	7	121	-1.9544	1
23S:23S	207	Essential	25	3877	-4.5201	1	3877	19	30	-1.7626	0.005589
4.5S:4.5S	9	Essential	2	3740	-5.0913	1	3740	1	453	-2.142	1
5S:5S	20	Essential	2	4023	-4.3911	1	4023	0	1930	0	1
Empty	1	NonEssential	0	3988	0	1	3988	1	69	1.6385	0.121342
rnpB:rnpB	21	Essential	15	809	-5.2193	0.329908	809	0	3738	0	1
RVBD0001:dnaA	104	Essential	34	800	-5.7466	0.320015	800	25	5	-1.7436	0.000198
RVBD0002:dnaN	137	Essential	96	27	-6.1438	7e-05	27	0	3781	0	1
RVBD0003:recF	6	NonEssential	3	3218	-5.4173	0.961122	3218	0	2373	0	1
RVBD0004:RVBD0004	5	Essential	3	937	-5.9908	0.332633	937	0	714	0	1
RVBD0005:gyrB	116	Essential	36	3025	-4.9264	1	3025	8	109	-2.0575	1
RVBD0006:gyrA	199	Essential	102	1761	-5.3538	0.640612	1761	4	1372	-2.142	1
RVBD0007:RVBD0007	5	NonEssential	5	134	-7.5832	0.009943	134	0	3996	0	1
RVBD0008c:RVBD0008c	6	NonEssential	3	2480	-5.5279	0.758391	2480	1	248	-1.7817	1
RVBD0009:ppiA	5	NonEssential	4	1443	-6.2838	0.454584	1443	0	2591	0	1
RVBD0010c:RVBD0010c	5	NonEssential	3	1572	-5.3398	0.483242	1572	0	2254	0	1
RVBD0011c:RVBD0011c	4	NonEssential	2	2342	-4.5328	0.689011	2342	0	1068	0	1
RVBD0012:RVBD0012	7	NonEssential	4	2918	-5.8144	0.897157	2918	0	1205	0	1
RVBD0013:trpG	100	Essential	35	3884	-4.7002	1	3884	1	2560	-2.142	1
RVBD0014c:pknB	159	Essential	103	51	-5.7579	7e-05	51	7	79	-1.3503	1
RVBD0015c:pknA	98	Essential	67	92	-5.956	0.002395	92	2	759	-1.8217	1
RVBD0016c:pbpA	10	NonEssential	6	910	-4.886	0.334242	910	0	2384	0	1
RVBD0017c:rodA	15	NonEssential	13	139	-6.404	0.022567	139	0	3947	0	1
RVBD0018c:pstP	174	Essential	69	3228	-5.2063	1	3228	1	2346	-1.7119	1
RVBD0019c:fhaB	5	Essential	4	648	-4.2144	0.214039	648	0	1525	0	1
RVBD0020c:fhaA	93	Essential	56	582	-5.7052	0.233939	582	1	2217	-2.0354	1
RVBD0021c:RVBD0021c	7	NonEssential	5	2095	-5.0094	0.672504	2095	0	2335	0	1
RVBD0022c:whiB5	6	NonEssential	4	1834	-5.1989	0.60073	1834	0	3281	0	1
RVBD0023:RVBD0023	55	Essential	25	3236	-5.2987	1	3236	2	898	-2.2618	1
RVBD0024:RVBD0024	5	NonEssential	2	2870	-4.5609	0.858114	2870	0	850	0	1
RVBD0025:RVBD0025	6	NonEssential	4	2564	-5.8833	0.787882	2564	0	2356	0	1
RVBD0026:RVBD0026	14	NonEssential	8	2306	-5.5039	0.768325	2306	1	596	-2.1419	1
RVBD0027:RVBD0027	4	NonEssential	4	1068	-5.1146	0.341779	1068	0	3527	0	1
RVBD0028:RVBD0028	7	NonEssential	5	1277	-5.3826	0.44534	1277	0	3639	0	1
RVBD0029:RVBD0029	9	NonEssential	8	745	-5.9049	0.275841	745	0	1343	0	1
RVBD0030:RVBD0030	4	NonEssential	3	2551	-5.3486	0.754211	2551	0	2179	0	1
RVBD0031:RVBD0031	2	NonEssential	1	3501	-4.19	0.938634	3501	0	2119	0	1
RVBD0032:bioF2	29	NonEssential	13	3319	-5.5066	1	3319	0	2935	0	1
RVBD0033:acpA	5	NonEssential	3	2687	-4.6875	0.805737	2687	0	1113	0	1
RVBD0034:RVBD0034	7	NonEssential	5	1144	-6.3442	0.418255	1144	0	3464	0	1
RVBD0035:fadD34	10	NonEssential	6	1618	-5.3114	0.550327	1618	0	3354	0	1
RVBD0036c:RVBD0036c	6	NonEssential	3	2857	-4.7165	0.884286	2857	0	1034	0	1
RVBD0037c:RVBD0037c	17	NonEssential	9	2705	-5.6078	0.901192	2705	0	1636	0	1
RVBD0038:RVBD0038	5	NonEssential	3	2709	-4.3466	0.814516	2709	0	1635	0	1
RVBD0039c:RVBD0039c	5	NonEssential	3	2965	-4.6569	0.885318	2965	0	551	0	1
RVBD0040c:mtc28	7	NonEssential	4	583	-4.7466	0.212036	583	0	2742	0	1
RVBD0041:leuS	279	Essential	98	3486	-5.1809	1	3486	2	2702	-1.8244	1
RVBD0042c:RVBD0042c	6	NonEssential	3	1993	-4.8783	0.641964	1993	0	918	0	1
RVBD0043c:RVBD0043c	15	NonEssential	7	1681	-5.0853	0.607244	1681	0	3383	0	1
RVBD0044c:RVBD0044c	9	NonEssential	5	2964	-5.7719	0.928829	2964	0	2338	0	1
RVBD0045c:RVBD0045c	10	NonEssential	6	1920	-4.6621	0.643377	1920	0	2579	0	1
RVBD0046c:ino1	51	Essential	23	2663	-5.7125	0.923669	2663	3	245	-1.8411	1
RVBD0047c:RVBD0047c	7	Essential	3	531	-6.073	0.195869	531	0	476	-2.4076	1
RVBD0048c:RVBD0048c	6	NonEssential	2	2257	-4.73	0.71381	2257	0	1188	0	1
RVBD0049:RVBD0049	7	NonEssential	5	1176	-6.1609	0.423095	1176	0	1300	0	1
RVBD0050:ponA1	15	NonEssential	12	155	-6.3481	0.029004	155	0	3884	0	1
RVBD0051:RVBD0051	22	NonEssential	14	1910	-5.6495	0.685426	1910	0	3047	0	1
RVBD0052:RVBD0052	8	NonEssential	7	295	-5.5812	0.10454	295	0	3510	0	1
RVBD0053:rpsF	19	Essential	5	3757	-4.9308	1	3757	2	265	-2.0144	1
RVBD0054:ssb	8	Essential	0	3998	-4.1326	1	3998	0	1364	0	1
RVBD0055:rpsR1	11	Essential	2	3939	-3.9662	1	3939	1	233	-1.4366	1
RVBD0056:rplI	6	NonEssential	2	3045	-4.3172	0.922148	3045	0	2691	0	1
RVBD0057:RVBD0057	8	Essential	3	2936	-3.7428	0.921878	2936	3	41	1.2936	0.019943
RVBD0058:dnaB	196	Essential	108	261	-5.7151	0.09435	261	9	125	-1.6165	1
RVBD0059:RVBD0059	7	NonEssential	6	590	-5.6253	0.212036	590	0	3855	0	1
RVBD0060:RVBD0060	52	Essential	19	3883	-5.5517	1	3883	6	49	-1.5266	0.219747
RVBD0061c:RVBD0061c	6	NonEssential	4	1345	-5.7207	0.440344	1345	0	1462	0	1
RVBD0062:celA1	11	NonEssential	5	2105	-5.2034	0.6948	2105	0	2252	0	1
RVBD0063:RVBD0063	19	NonEssential	12	1983	-5.7328	0.697949	1983	0	1135	0	1
RVBD0064:RVBD0064	38	NonEssential	20	2833	-5.576	0.956292	2833	0	4035	0	1
RVBD0064A:vapB1	6	NonEssential	5	1717	-6.2766	0.563005	1717	0	2760	0	1
RVBD0065:vapC1	7	NonEssential	4	729	-6.2275	0.253113	729	0	1016	0	1
RVBD0066c:icd2	22	NonEssential	18	136	-5.6796	0.023366	136	0	3790	0	1
RVBD0067c:RVBD0067c	5	NonEssential	2	1586	-4.4995	0.494152	1586	0	1884	0	1
RVBD0068:RVBD0068	5	NonEssential	3	1355	-4.5152	0.434497	1355	0	1896	0	1
RVBD0069c:sdaA	11	NonEssential	7	2086	-6.0538	0.688893	2086	1	183	-1.3266	1
RVBD0070c:glyA2	11	NonEssential	7	2115	-5.9757	0.69629	2115	0	1366	0	1
RVBD0071:RVBD0071	6	NonEssential	5	532	-6.3685	0.187352	532	0	2071	0	1
RVBD0072:RVBD0072	10	NonEssential	8	90	-7.2036	0.001947	90	1	309	-1.7119	1
RVBD0073:RVBD0073	8	NonEssential	5	1814	-6.2704	0.599183	1814	0	2553	0	1
RVBD0074:RVBD0074	6	NonEssential	5	1282	-5.5854	0.423985	1282	0	3323	0	1
RVBD0075:RVBD0075	6	NonEssential	5	1664	-5.7401	0.539031	1664	0	3270	0	1
RVBD0076c:RVBD0076c	8	NonEssential	5	1063	-5.2157	0.402779	1063	1	202	-1.4366	1
RVBD0077c:RVBD0077c	8	NonEssential	6	1136	-5.5627	0.421456	1136	0	3509	0	1
RVBD0078:RVBD0078	7	NonEssential	5	1616	-5.0265	0.529709	1616	0	1770	0	1
RVBD0078A:RVBD0078A	8	NonEssential	8	331	-5.8983	0.121102	331	0	3952	0	1
RVBD0078B:RVBD0078B	3	NonEssential	1	3560	-5.4869	0.987335	3560	0	454	0	1
RVBD0079:RVBD0079	7	NonEssential	5	2151	-4.0915	0.696159	2151	0	1040	0	1
RVBD0080:RVBD0080	5	NonEssential	3	2041	-6.0508	0.643945	2041	0	681	0	1
RVBD0081:RVBD0081	5	NonEssential	3	2649	-6.0496	0.794745	2649	0	849	0	1
RVBD0082:RVBD0082	2	NonEssential	2	1955	-6.7014	0.526777	1955	0	2821	0	1
RVBD0083:RVBD0083	11	NonEssential	4	3320	-5.439	1	3320	0	1241	0	1
RVBD0084:hycD	7	Essential	5	1847	-5.6086	0.594035	1847	0	3753	0	1
RVBD0085:hycP	6	NonEssential	4	2756	-5.5497	0.854178	2756	0	1821	0	1
RVBD0086:hycQ	22	NonEssential	8	2394	-5.2495	0.814973	2394	0	3404	0	1
RVBD0087:hycE	9	NonEssential	5	1428	-5.7287	0.500099	1428	0	3543	0	1
RVBD0088:RVBD0088	6	NonEssential	2	2334	-5.0988	0.728192	2334	0	523	0	1
RVBD0089:RVBD0089	5	NonEssential	3	3166	-5.6754	0.94071	3166	0	2022	0	1
RVBD0090:RVBD0090	6	NonEssential	4	2031	-5.4673	0.655958	2031	0	1072	0	1
RVBD0091:mtn	6	NonEssential	5	868	-6.6848	0.317379	868	0	1684	0	1
RVBD0092:ctpA	10	NonEssential	6	2862	-4.5089	0.916127	2862	0	1645	0	1
RVBD0093c:RVBD0093c	5	NonEssential	2	3421	-5.5497	0.991167	3421	0	1839	0	1
RVBD0094c:RVBD0094c	4	NonEssential	3	699	-4.2533	0.211415	699	0	2539	0	1
RVBD0095c:RVBD0095c	6	NonEssential	4	2819	-5.7803	0.870102	2819	0	3360	0	1
RVBD0096:PPE1	12	NonEssential	8	812	-5.281	0.318501	812	0	3055	0	1
RVBD0097:RVBD0097	10	NonEssential	6	556	-6.7325	0.214698	556	0	2107	0	1
RVBD0098:fcoT	11	NonEssential	8	181	-5.3823	0.043368	181	0	3770	0	1
RVBD0099:fadD10	18	NonEssential	15	167	-5.7013	0.040466	167	0	3936	0	1
RVBD0100:RVBD0100	5	NonEssential	4	1143	-6.7745	0.382599	1143	0	2573	0	1
RVBD0101:nrp	52	Essential	29	1548	-5.1744	0.57336	1548	0	2628	0	1
RVBD0102:RVBD0102	237	Essential	102	3217	-5.3224	1	3217	4	1313	-1.7948	1
RVBD0103c:ctpB	17	NonEssential	11	2016	-5.8144	0.696739	2016	0	3923	0	1
RVBD0104:RVBD0104	25	NonEssential	16	1835	-5.69	0.672504	1835	0	3357	0	1
RVBD0105c:rpmB1	2	NonEssential	1	1981	-7.7129	0.532772	1981	0	226	-2.4076	1
RVBD0106:RVBD0106	6	NonEssential	4	1782	-6.0575	0.585039	1782	0	686	0	1
RVBD0107c:ctpI	27	NonEssential	15	1528	-5.3575	0.561547	1528	0	2290	0	1
RVBD0108c:RVBD0108c	5	NonEssential	3	1542	-4.065	0.474428	1542	0	710	0	1
RVBD0109:PE-PGRS1	6	NonEssential	4	1412	-6.1261	0.460492	1412	0	450	0	1
RVBD0110:RVBD0110	5	NonEssential	2	2902	-5.9012	0.866989	2902	0	612	0	1
RVBD0111:RVBD0111	19	NonEssential	12	1967	-5.8664	0.695361	1967	0	3219	0	1
RVBD0112:gca	10	NonEssential	7	1237	-5.9504	0.460507	1237	0	3206	0	1
RVBD0113:gmhA	6	NonEssential	5	835	-6.663	0.301168	835	0	3534	0	1
RVBD0114:gmhB	8	NonEssential	5	2140	-5.285	0.70271	2140	0	2517	0	1
RVBD0115:hddA	17	NonEssential	10	736	-5.6082	0.290039	736	1	267	-1.3594	1
RVBD0116c:ldtA	5	NonEssential	1	1066	-5.3126	0.364937	1066	0	1305	0	1
RVBD0117:oxyS	6	NonEssential	5	1132	-4.8156	0.396737	1132	0	3655	0	1
RVBD0118c:oxcA	10	NonEssential	6	393	-5.1479	0.150078	393	0	2862	0	1
RVBD0119:fadD7	10	NonEssential	9	469	-5.6789	0.179762	469	1	259	-1.5642	1
RVBD0120c:fusA2	20	NonEssential	12	1795	-5.391	0.660022	1795	0	2372	0	1
RVBD0121c:RVBD0121c	5	NonEssential	4	971	-6.2838	0.341098	971	0	3497	0	1
RVBD0122:RVBD0122	5	NonEssential	3	2654	-6.0076	0.797369	2654	0	2378	0	1
RVBD0123:RVBD0123	4	Essential	0	4020	-1.0962	1	4020	1	246	-2.0354	1
RVBD0124:PE-PGRS2	5	NonEssential	3	2759	-4.1971	0.824526	2759	0	1494	0	1
RVBD0125:pepA	7	NonEssential	3	3534	-5.2453	1	3534	0	808	0	1
RVBD0126:treS	27	Essential	26	20	-6.9086	7e-05	20	0	4042	0	1
RVBD0127:mak	12	NonEssential	11	38	-8.0129	7e-05	38	0	2668	0	1
RVBD0128:RVBD0128	10	NonEssential	5	2792	-5.6086	0.896109	2792	1	326	-1.7436	1
RVBD0129c:fbpC	13	NonEssential	5	1985	-5.5397	0.680913	1985	0	1467	0	1
RVBD0130:htdZ	5	NonEssential	3	3205	-5.6442	0.954966	3205	0	3066	0	1
RVBD0131c:fadE1	13	NonEssential	9	1284	-5.3026	0.47204	1284	0	1359	0	1
RVBD0132c:fgd2	13	NonEssential	5	1961	-5.099	0.672504	1961	1	344	-1.7058	1
RVBD0133:RVBD0133	5	NonEssential	3	3108	-5.9165	0.928829	3108	0	845	0	1
RVBD0134:ephF	12	NonEssential	8	1328	-5.605	0.480586	1328	0	3036	0	1
RVBD0135c:RVBD0135c	5	NonEssential	1	3878	-4.7202	1	3878	0	2025	0	1
RVBD0136:cyp138	12	NonEssential	9	1472	-4.9911	0.535383	1472	0	3813	0	1
RVBD0137c:msrA	8	NonEssential	3	2476	-4.9742	0.786491	2476	0	2765	0	1
RVBD0138:RVBD0138	8	NonEssential	5	1636	-5.7757	0.541884	1636	0	3705	0	1
RVBD0139:RVBD0139	8	NonEssential	3	2826	-4.6919	0.894744	2826	0	2027	0	1
RVBD0140:RVBD0140	6	NonEssential	3	2507	-5.6755	0.764636	2507	0	678	0	1
RVBD0141c:RVBD0141c	5	NonEssential	3	2464	-6.1124	0.748652	2464	0	2590	0	1
RVBD0142:RVBD0142	7	NonEssential	5	1139	-4.3805	0.409716	1139	0	3177	0	1
RVBD0143c:RVBD0143c	15	NonEssential	5	3488	-5.4725	1	3488	0	3438	0	1
RVBD0144:RVBD0144	6	NonEssential	6	543	-5.8198	0.191627	543	0	3848	0	1
RVBD0145:RVBD0145	7	NonEssential	5	1302	-6.1057	0.451539	1302	0	3665	0	1
RVBD0146:RVBD0146	7	NonEssential	4	2380	-5.3514	0.760247	2380	0	1261	0	1
RVBD0147:RVBD0147	7	NonEssential	3	3131	-5.3022	0.959101	3131	0	3163	0	1
RVBD0148:RVBD0148	7	NonEssential	7	210	-6.8831	0.050534	210	0	3970	0	1
RVBD0149:RVBD0149	8	NonEssential	6	1420	-5.934	0.474428	1420	0	2055	0	1
RVBD0150c:RVBD0150c	7	NonEssential	4	2835	-4.5924	0.87627	2835	0	1680	0	1
RVBD0151c:PE1	16	NonEssential	10	689	-4.8988	0.275841	689	0	3863	0	1
RVBD0152c:PE2	16	NonEssential	6	1683	-5.1942	0.618865	1683	0	1329	0	1
RVBD0153c:ptbB	5	NonEssential	1	2300	-5.4588	0.716117	2300	0	1076	0	1
RVBD0154c:fadE2	8	NonEssential	4	3039	-4.4705	0.939665	3039	0	3189	0	1
RVBD0155:pntAa	10	NonEssential	8	1220	-5.6242	0.454584	1220	0	3257	0	1
RVBD0156:pntAb	9	NonEssential	2	3269	-5.1823	0.999987	3269	0	1344	0	1
RVBD0157:pntB	15	NonEssential	9	375	-5.1874	0.150288	375	0	3492	0	1
RVBD0157A:RVBD0157A	6	NonEssential	0	4011	-3.0118	1	4011	0	522	0	1
RVBD0158:RVBD0158	5	NonEssential	4	1593	-5.6418	0.495543	1593	0	3573	0	1
RVBD0159c:PE3	12	NonEssential	7	2550	-5.7014	0.840656	2550	0	3654	0	1
RVBD0160c:PE4	18	NonEssential	8	1534	-5.3232	0.572951	1534	1	419	-1.7058	1
RVBD0161:RVBD0161	6	NonEssential	4	606	-5.3507	0.21574	606	0	3606	0	1
RVBD0162c:adhE1	7	NonEssential	4	1359	-4.0809	0.468866	1359	0	694	0	1
RVBD0163:RVBD0163	8	NonEssential	6	698	-5.1493	0.240271	698	0	3358	0	1
RVBD0164:TB18.5	63	Essential	46	63	-5.7043	7e-05	63	0	4008	0	1
RVBD0165c:mce1R	6	NonEssential	2	1991	-4.8571	0.641964	1991	0	1011	0	1
RVBD0166:fadD5	16	NonEssential	13	419	-5.7837	0.169332	419	0	3250	0	1
RVBD0167:yrbE1A	7	NonEssential	2	2642	-5.3022	0.830758	2642	2	46	2.7337	0.02159
RVBD0168:yrbE1B	8	NonEssential	0	4024	-2.8598	1	4024	5	24	2.1172	0.000198
RVBD0169:mce1A	13	NonEssential	1	3949	-3.569	1	3949	6	15	3.6132	0.000198
RVBD0170:mce1B	10	NonEssential	1	3947	-3.7913	1	3947	8	8	3.0497	0.000198
RVBD0171:mce1C	15	NonEssential	3	3910	-5.4092	1	3910	8	9	4.8281	0.000198
RVBD0172:mce1D	12	NonEssential	0	4046	-3.815	1	4046	5	18	4.0023	0.000198
RVBD0173:lprK	8	NonEssential	0	4017	-5.0576	1	4017	5	22	2.8589	0.000198
RVBD0174:mce1F	15	NonEssential	2	3508	-3.218	1	3508	4	31	4.9001	0.000952
RVBD0175:RVBD0175	6	NonEssential	3	2074	-5.708	0.663181	2074	0	990	0	1
RVBD0176:RVBD0176	9	NonEssential	5	1554	-5.4338	0.530998	1554	0	2469	0	1
RVBD0177:RVBD0177	7	NonEssential	6	609	-5.9466	0.2161	609	0	3539	0	1
RVBD0178:RVBD0178	5	NonEssential	4	2065	-5.7491	0.649973	2065	0	1049	0	1
RVBD0179c:lprO	14	NonEssential	9	1177	-5.0264	0.434497	1177	0	2210	0	1
RVBD0180c:RVBD0180c	15	NonEssential	8	3090	-5.1398	0.989048	3090	0	1929	0	1
RVBD0181c:RVBD0181c	8	NonEssential	5	1054	-5.2784	0.400661	1054	0	3553	0	1
RVBD0182c:sigG	5	NonEssential	2	2752	-4.6448	0.823785	2752	0	763	0	1
RVBD0183:RVBD0183	6	NonEssential	3	2987	-5.1359	0.913166	2987	0	2446	0	1
RVBD0184:RVBD0184	7	NonEssential	4	2132	-4.9875	0.69149	2132	0	2158	0	1
RVBD0185:RVBD0185	6	NonEssential	2	3602	-5.2574	1	3602	0	1143	0	1
RVBD0186:bglS	12	NonEssential	8	1014	-5.811	0.374249	1014	0	3276	0	1
RVBD0186Ac:RVBD0186Ac	4	NonEssential	3	348	-5.5897	0.092875	348	0	802	0	1
RVBD0187:RVBD0187	5	NonEssential	2	3365	-4.9977	0.986972	3365	0	703	0	1
RVBD0188:RVBD0188	7	NonEssential	5	2381	-5.1874	0.760247	2381	0	1968	0	1
RVBD0189c:ilvD	183	Essential	47	3681	-4.6936	1	3681	2	2229	-1.9383	1
RVBD0190:RVBD0190	5	NonEssential	1	1072	-3.7712	0.366033	1072	0	480	0	1
RVBD0191:RVBD0191	5	NonEssential	4	1682	-5.3107	0.526777	1682	0	3101	0	1
RVBD0192:RVBD0192	12	NonEssential	6	1547	-5.246	0.561377	1547	0	3649	0	1
RVBD0193c:RVBD0193c	27	NonEssential	12	2879	-5.2813	0.956292	2879	0	2414	0	1
RVBD0194:RVBD0194	17	NonEssential	6	3164	-5.1349	1	3164	0	3012	0	1
RVBD0195:RVBD0195	8	NonEssential	3	3669	-4.819	1	3669	0	2788	0	1
RVBD0196:RVBD0196	5	NonEssential	3	2568	-5.3224	0.771289	2568	0	1117	0	1
RVBD0197:RVBD0197	30	NonEssential	18	1840	-5.2408	0.672504	1840	0	3450	0	1
RVBD0198c:zmp1	12	NonEssential	6	2312	-5.5079	0.771289	2312	0	2365	0	1
RVBD0199:RVBD0199	5	NonEssential	4	865	-6.8345	0.312716	865	0	1906	0	1
RVBD0200:RVBD0200	9	NonEssential	4	2804	-4.6378	0.89203	2804	0	2542	0	1
RVBD0201c:RVBD0201c	6	NonEssential	3	2855	-5.504	0.882698	2855	0	1857	0	1
RVBD0202c:mmpL11	14	NonEssential	10	1582	-5.6456	0.57336	1582	0	2293	0	1
RVBD0203:RVBD0203	5	NonEssential	2	1739	-5.4084	0.541884	1739	0	2634	0	1
RVBD0204c:RVBD0204c	13	NonEssential	11	135	-6.4032	0.020545	135	0	3925	0	1
RVBD0205:RVBD0205	18	NonEssential	11	1677	-5.9866	0.622591	1677	0	1594	0	1
RVBD0206c:mmpL3	293	Essential	136	343	-5.2595	0.132816	343	10	375	-1.8432	1
RVBD0207c:RVBD0207c	6	Essential	4	2139	-5.2904	0.680311	2139	0	2222	0	1
RVBD0208c:RVBD0208c	8	NonEssential	6	979	-4.8194	0.358726	979	0	2787	0	1
RVBD0209:RVBD0209	9	NonEssential	8	335	-6.3114	0.124822	335	0	3809	0	1
RVBD0210:RVBD0210	6	NonEssential	3	3003	-5.4628	0.913166	3003	0	2730	0	1
RVBD0211:pckA	23	NonEssential	9	3505	-4.8957	1	3505	1	59	11.132	0.314734
RVBD0212c:nadR	5	NonEssential	1	3215	-4.8298	0.956292	3215	0	755	0	1
RVBD0213c:RVBD0213c	16	NonEssential	10	1912	-5.429	0.672504	1912	0	3042	0	1
RVBD0214:fadD4	10	NonEssential	9	131	-6.4825	0.015542	131	0	2385	0	1
RVBD0215c:fadE3	7	NonEssential	6	1040	-5.1118	0.366033	1040	0	3290	0	1
RVBD0216:RVBD0216	11	NonEssential	10	378	-5.8349	0.148552	378	0	2868	0	1
RVBD0217c:lipW	7	NonEssential	4	2244	-5.7526	0.728461	2244	0	2028	0	1
RVBD0218:RVBD0218	15	NonEssential	10	1215	-6.0461	0.448557	1215	0	1750	0	1
RVBD0219:RVBD0219	6	NonEssential	5	1487	-5.6605	0.474933	1487	0	3645	0	1
RVBD0220:lipC	9	NonEssential	7	618	-5.2761	0.227109	618	0	3252	0	1
RVBD0221:RVBD0221	8	NonEssential	6	1263	-5.9384	0.44825	1263	1	472	-2.2931	1
RVBD0222:echA1	9	NonEssential	7	324	-4.7981	0.119925	324	0	3198	0	1
RVBD0223c:RVBD0223c	13	NonEssential	5	3668	-5.3129	1	3668	0	1783	0	1
RVBD0224c:RVBD0224c	101	Essential	57	479	-5.594	0.187352	479	1	3022	-2.3597	1
RVBD0225:RVBD0225	97	Essential	59	176	-5.8917	0.042481	176	2	655	-1.5541	1
RVBD0226c:RVBD0226c	176	Essential	116	28	-5.924	7e-05	28	1	2066	-1.6165	1
RVBD0227c:RVBD0227c	100	Essential	53	560	-5.3911	0.223642	560	1	2829	-2.3504	1
RVBD0228:RVBD0228	155	Essential	102	87	-5.8617	0.001947	87	1	907	-1.3266	1
RVBD0229Ac:RVBD0229Ac	2	NonEssential	0	3601	-5.487	0.989048	3601	0	1812	0	1
RVBD0229c:RVBD0229c	7	NonEssential	5	888	-4.5686	0.320015	888	0	2455	0	1
RVBD0230c:php	9	NonEssential	4	3113	-5.6253	0.971558	3113	0	1656	0	1
RVBD0231:fadE4	21	NonEssential	13	463	-5.8574	0.194875	463	0	2098	0	1
RVBD0232:RVBD0232	12	NonEssential	6	3071	-5.1113	0.973244	3071	0	2221	0	1
RVBD0233:nrdB	11	NonEssential	7	2413	-5.4554	0.793566	2413	0	2942	0	1
RVBD0234c:gabD1	15	NonEssential	9	2478	-5.6418	0.83002	2478	0	3581	0	1
RVBD0235c:RVBD0235c	23	NonEssential	12	2680	-5.5959	0.897157	2680	0	3403	0	1
RVBD0236A:RVBD0236A	4	Essential	1	3683	-4.3893	1	3683	0	861	0	1
RVBD0236c:aftD	492	Essential	352	4	-5.9948	7e-05	4	4	3264	-1.8432	1
RVBD0237:lpqI	7	NonEssential	5	1005	-5.6418	0.358726	1005	0	3355	0	1
RVBD0238:RVBD0238	8	NonEssential	6	933	-3.8051	0.338072	933	0	3785	0	1
RVBD0240:vapC24	9	NonEssential	7	1056	-6.0625	0.382599	1056	0	1802	0	1
RVBD0241c:htdX	6	NonEssential	5	1001	-6.1371	0.347858	1001	0	3440	0	1
RVBD0242c:fabG4	9	NonEssential	3	3252	-5.1349	0.997472	3252	0	1605	0	1
RVBD0243:fadA2	7	NonEssential	3	2606	-5.0465	0.823537	2606	0	1730	0	1
RVBD0244c:fadE5	16	NonEssential	9	1706	-5.5016	0.623739	1706	0	2581	0	1
RVBD0245:RVBD0245	6	NonEssential	4	806	-6.6296	0.282675	806	0	757	0	1
RVBD0246:RVBD0246	11	NonEssential	9	444	-6.1837	0.17592	444	0	1894	0	1
RVBD0247c:RVBD0247c	8	NonEssential	8	198	-5.511	0.044681	198	0	4010	0	1
RVBD0248c:RVBD0248c	6	NonEssential	4	1107	-5.8437	0.382599	1107	0	1473	0	1
RVBD0249c:RVBD0249c	16	NonEssential	12	218	-6.3952	0.07335	218	0	1347	0	1
RVBD0250c:RVBD0250c	4	NonEssential	2	2214	-4.198	0.660022	2214	0	819	0	1
RVBD0251c:hsp	8	NonEssential	3	3604	-5.5545	1	3604	0	843	0	1
RVBD0252:nirB	10	NonEssential	6	2434	-5.1837	0.788774	2434	0	2280	0	1
RVBD0253:nirD	6	NonEssential	5	1316	-5.4476	0.434497	1316	0	1890	0	1
RVBD0254c:cobU	6	NonEssential	3	1415	-5.5332	0.461723	1415	0	1593	0	1
RVBD0255c:cobQ1	12	NonEssential	9	1333	-5.1262	0.483327	1333	0	3513	0	1
RVBD0256c:PPE2	11	NonEssential	9	685	-6.104	0.256038	685	0	2149	0	1
RVBD0257:RVBD0257	8	NonEssential	7	836	-5.8648	0.307926	836	0	3053	0	1
RVBD0258c:RVBD0258c	9	NonEssential	6	1809	-6.2362	0.601489	1809	0	2274	0	1
RVBD0259c:RVBD0259c	11	NonEssential	6	2303	-5.5672	0.755996	2303	1	580	-2.254	1
RVBD0260c:RVBD0260c	7	NonEssential	5	1626	-4.7458	0.531595	1626	0	2544	0	1
RVBD0261c:narK3	20	NonEssential	11	2869	-5.2578	0.949146	2869	0	3128	0	1
RVBD0262c:aac	4	NonEssential	2	3444	-4.0963	0.990877	3444	0	896	0	1
RVBD0263c:RVBD0263c	7	NonEssential	3	3095	-5.6253	0.952911	3095	0	1233	0	1
RVBD0264c:RVBD0264c	5	NonEssential	3	3194	-5.7489	0.952911	3194	1	263	-1.973	1
RVBD0265c:RVBD0265c	10	NonEssential	8	882	-6.1138	0.329244	882	0	2477	0	1
RVBD0266c:oplA	24	NonEssential	11	2528	-5.5545	0.86066	2528	0	2194	0	1
RVBD0267:narU	28	NonEssential	16	2428	-5.7444	0.835702	2428	1	1022	-2.142	1
RVBD0268c:RVBD0268c	2	NonEssential	2	2246	-6.3219	0.614161	2246	0	2533	0	1
RVBD0269c:RVBD0269c	7	NonEssential	3	3259	-5.3022	0.989048	3259	0	1248	0	1
RVBD0270:fadD2	14	NonEssential	9	771	-5.8153	0.305477	771	0	2669	0	1
RVBD0271c:fadE6	16	NonEssential	7	3579	-4.9962	1	3579	3	99	-2.254	0.666517
RVBD0272c:RVBD0272c	8	NonEssential	6	1116	-4.9246	0.418255	1116	0	2885	0	1
RVBD0273c:RVBD0273c	7	NonEssential	4	1931	-5.3514	0.623237	1931	0	2251	0	1
RVBD0274:RVBD0274	12	NonEssential	12	143	-5.8654	0.023775	143	0	4031	0	1
RVBD0275c:RVBD0275c	6	NonEssential	4	712	-4.7866	0.251706	712	0	2205	0	1
RVBD0276:RVBD0276	5	NonEssential	3	2311	-4.9424	0.716781	2311	0	1488	0	1
RVBD0277Ac:RVBD0277Ac	2	NonEssential	2	2522	-5.6926	0.694698	2522	0	2265	0	1
RVBD0277c:vapC25	6	NonEssential	4	2757	-4.9012	0.854178	2757	0	1899	0	1
RVBD0278c:PE-PGRS3	10	NonEssential	5	3175	-5.4979	0.985966	3175	0	3800	0	1
RVBD0279c:PE-PGRS4	7	NonEssential	6	1127	-5.9205	0.405787	1127	0	3315	0	1
RVBD0280:PPE3	5	NonEssential	3	1862	-5.5335	0.579727	1862	0	3000	0	1
RVBD0281:RVBD0281	6	NonEssential	4	1780	-5.8605	0.583437	1780	0	3447	0	1
RVBD0282:eccA3	163	Essential	83	2505	-5.4883	0.858636	2505	2	2614	-2.0985	1
RVBD0283:eccB3	156	Essential	70	2581	-5.3908	0.882128	2581	1	2816	-1.973	1
RVBD0284:eccC3	390	Essential	162	3933	-5.2795	1	3933	4	1500	-2.0739	1
RVBD0285:PE5	9	NonEssential	5	2841	-5.275	0.895926	2841	0	855	0	1
RVBD0286:PPE4	144	Essential	64	3456	-5.3087	1	3456	1	3366	-2.2931	1
RVBD0287:esxG	26	Essential	14	2062	-5.6955	0.737626	2062	0	3193	0	1
RVBD0288:esxH	10	NonEssential	7	623	-5.886	0.233939	623	0	1317	0	1
RVBD0289:espG3	85	Essential	47	1258	-5.3992	0.47204	1258	2	767	-1.6826	1
RVBD0290:eccD3	194	Essential	117	251	-5.6013	0.088761	251	3	501	-2.1419	1
RVBD0291:mycP3	97	Essential	53	2223	-5.3022	0.768325	2223	0	4016	0	1
RVBD0292:eccE3	137	Essential	56	2600	-5.4446	0.886558	2600	1	3336	-2.297	1
RVBD0293c:RVBD0293c	10	NonEssential	8	859	-6.0306	0.322699	859	0	1511	0	1
RVBD0294:tam	6	NonEssential	3	3094	-5.285	0.93484	3094	0	1685	0	1
RVBD0295c:RVBD0295c	8	NonEssential	5	478	-4.7128	0.167	478	1	68	9.2887	0.287897
RVBD0296c:RVBD0296c	10	NonEssential	6	2229	-5.8656	0.742955	2229	1	56	10.224	0.161089
RVBD0297:PE-PGRS5	11	NonEssential	5	3077	-5.5604	0.971106	3077	0	3630	0	1
RVBD0298:RVBD0298	1	NonEssential	0	3811	0	1	3811	0	291	0	1
RVBD0299:RVBD0299	5	NonEssential	2	3451	-5.647	0.997472	3451	0	828	0	1
RVBD0300:RVBD0300	4	NonEssential	3	1631	-5.703	0.504719	1631	0	3106	0	1
RVBD0301:vapC2	6	NonEssential	2	3300	-4.9962	0.984343	3300	0	486	0	1
RVBD0302:RVBD0302	8	NonEssential	8	129	-7.1523	0.014093	129	0	4037	0	1
RVBD0303:RVBD0303	10	NonEssential	6	941	-5.4167	0.341505	941	0	3468	0	1
RVBD0304c:PPE5	45	NonEssential	24	573	-5.3798	0.23825	573	1	442	-1.8902	1
RVBD0305c:PPE6	13	NonEssential	9	1531	-5.7218	0.546109	1531	0	3681	0	1
RVBD0306:RVBD0306	5	NonEssential	4	913	-4.8281	0.324448	913	0	2327	0	1
RVBD0307c:RVBD0307c	5	NonEssential	3	3054	-5.3295	0.913166	3054	0	1935	0	1
RVBD0308:RVBD0308	8	NonEssential	4	1478	-4.9297	0.492661	1478	0	1606	0	1
RVBD0309:RVBD0309	7	NonEssential	6	1307	-5.6871	0.454593	1307	0	2234	0	1
RVBD0310c:RVBD0310c	6	NonEssential	5	1699	-6.1196	0.555289	1699	0	2577	0	1
RVBD0311:RVBD0311	8	NonEssential	5	997	-5.3389	0.361564	997	0	1089	0	1
RVBD0312:RVBD0312	16	NonEssential	9	2695	-5.3398	0.895926	2695	0	1145	0	1
RVBD0313:RVBD0313	6	NonEssential	5	1245	-6.0726	0.423095	1245	0	1822	0	1
RVBD0314c:RVBD0314c	7	NonEssential	3	406	-5.7756	0.144512	406	1	438	-2.297	1
RVBD0315:RVBD0315	13	NonEssential	8	665	-4.7756	0.2587	665	0	2508	0	1
RVBD0316:RVBD0316	7	NonEssential	4	3048	-5.746	0.93484	3048	0	2992	0	1
RVBD0317c:glpQ2	8	NonEssential	3	1255	-4.8561	0.446651	1255	0	842	0	1
RVBD0318c:RVBD0318c	11	NonEssential	7	2390	-4.9819	0.787079	2390	1	579	-2.254	1
RVBD0319:pcp	5	NonEssential	4	989	-6.1723	0.346342	989	0	2270	0	1
RVBD0320:RVBD0320	8	NonEssential	7	424	-4.5739	0.155595	424	0	3640	0	1
RVBD0321:dcd	7	NonEssential	3	3177	-4.1971	0.973615	3177	0	1572	0	1
RVBD0322:udgA	7	NonEssential	6	302	-6.708	0.097805	302	0	823	0	1
RVBD0323c:RVBD0323c	7	NonEssential	6	791	-5.938	0.281236	791	0	3341	0	1
RVBD0324:RVBD0324	7	NonEssential	5	1235	-5.1459	0.434497	1235	0	2421	0	1
RVBD0325:RVBD0325	5	NonEssential	0	3986	-4.8671	1	3986	0	2122	0	1
RVBD0326:RVBD0326	6	NonEssential	3	3144	-5.7594	0.943268	3144	0	1431	0	1
RVBD0327c:cyp135A1	25	NonEssential	13	2802	-4.7177	0.934692	2802	0	3852	0	1
RVBD0328:RVBD0328	6	NonEssential	3	3067	-5.4883	0.92878	3067	0	1028	0	1
RVBD0329c:RVBD0329c	6	NonEssential	1	3156	-5.4471	0.944468	3156	0	889	0	1
RVBD0330c:RVBD0330c	7	NonEssential	6	1243	-5.8123	0.434752	1243	0	2170	0	1
RVBD0331:RVBD0331	11	NonEssential	5	2636	-5.5696	0.866544	2636	0	3574	0	1
RVBD0332:RVBD0332	8	NonEssential	5	2026	-5.5095	0.672504	2026	0	3039	0	1
RVBD0333:RVBD0333	5	NonEssential	2	2799	-4.4896	0.839024	2799	0	1757	0	1
RVBD0334:rmlA	45	Essential	28	205	-5.4566	0.063032	205	2	211	-1.4834	1
RVBD0335c:PE6	8	NonEssential	6	1436	-5.3493	0.476037	1436	0	3443	0	1
RVBD0336:RVBD0336	6	NonEssential	2	2694	-5.2167	0.834126	2694	0	2938	0	1
RVBD0337c:aspC	148	Essential	38	2831	-4.9424	0.970368	2831	13	43	-1.9429	0.150887
RVBD0338c:RVBD0338c	349	Essential	169	3461	-5.4799	1	3461	8	184	-1.8792	1
RVBD0339c:RVBD0339c	17	NonEssential	10	1914	-5.9597	0.673994	1914	0	1551	0	1
RVBD0340:RVBD0340	6	NonEssential	3	3332	-3.763	0.989048	3332	0	1793	0	1
RVBD0341:iniB	8	NonEssential	8	164	-6.8615	0.028811	164	0	4002	0	1
RVBD0342:iniA	13	NonEssential	9	883	-5.9166	0.334242	883	0	3472	0	1
RVBD0343:iniC	14	NonEssential	10	978	-6.0574	0.369572	978	0	2858	0	1
RVBD0344c:lpqJ	8	NonEssential	3	3021	-4.7732	0.936987	3021	0	1283	0	1
RVBD0345:RVBD0345	5	NonEssential	2	3343	-5.2898	0.983067	3343	0	1961	0	1
RVBD0346c:ansP2	21	NonEssential	7	3826	-5.2128	1	3826	1	701	-2.0058	1
RVBD0347:RVBD0347	72	Essential	18	3942	-4.6355	1	3942	3	602	-2.2067	1
RVBD0348:RVBD0348	8	NonEssential	5	1675	-5.6849	0.555771	1675	0	1397	0	1
RVBD0349:RVBD0349	10	NonEssential	6	2474	-5.2734	0.802607	2474	0	2978	0	1
RVBD0350:dnaK	125	Essential	50	3749	-5.1937	1	3749	3	484	-1.561	1
RVBD0351:grpE	30	Essential	22	330	-5.8692	0.136125	330	0	3227	0	1
RVBD0352:dnaJ1	7	Essential	6	581	-6.9976	0.212036	581	0	3500	0	1
RVBD0353:hspR	5	NonEssential	1	3138	-5.1874	0.936987	3138	0	1436	0	1
RVBD0354c:PPE7	12	NonEssential	9	448	-6.3195	0.175009	448	0	3845	0	1
RVBD0355c:PPE8	56	NonEssential	40	172	-5.6002	0.042478	172	0	4034	0	1
RVBD0356c:RVBD0356c	5	NonEssential	2	2376	-4.1366	0.727385	2376	0	1447	0	1
RVBD0357c:purA	157	Essential	38	4005	-4.6378	1	4005	1	2701	-1.9429	1
RVBD0358:RVBD0358	53	NonEssential	23	3658	-5.1246	1	3658	0	2722	0	1
RVBD0359:RVBD0359	9	NonEssential	5	1020	-5.1118	0.369572	1020	0	2377	0	1
RVBD0360c:RVBD0360c	6	NonEssential	2	3263	-3.2377	0.973615	3263	1	214	-1.6165	1
RVBD0361:RVBD0361	6	NonEssential	4	1044	-6.5444	0.361944	1044	0	3700	0	1
RVBD0362:mgtE	11	NonEssential	6	2114	-4.6823	0.69629	2114	0	2697	0	1
RVBD0363c:fba	86	NonEssential	42	3066	-5.4566	1	3066	0	3372	0	1
RVBD0364:RVBD0364	108	Essential	52	2400	-5.3163	0.8234	2400	3	565	-1.9429	1
RVBD0365c:RVBD0365c	7	NonEssential	3	1971	-5.5484	0.638578	1971	0	1597	0	1
RVBD0366c:RVBD0366c	7	NonEssential	5	1609	-4.1744	0.52838	1609	0	1816	0	1
RVBD0367c:RVBD0367c	5	NonEssential	2	3656	-4.9648	1	3656	1	327	-2.2067	1
RVBD0368c:RVBD0368c	5	NonEssential	2	3576	-3.406	1	3576	0	774	0	1
RVBD0369c:RVBD0369c	5	NonEssential	2	2472	-4.0266	0.748652	2472	0	773	0	1
RVBD0370c:RVBD0370c	6	NonEssential	3	2613	-3.8473	0.801786	2613	0	1052	0	1
RVBD0371c:RVBD0371c	7	NonEssential	4	2973	-5.7848	0.913166	2973	0	2296	0	1
RVBD0372c:RVBD0372c	5	NonEssential	4	647	-6.5035	0.214039	647	0	1066	0	1
RVBD0373c:RVBD0373c	13	NonEssential	6	3163	-4.8478	0.991529	3163	0	2493	0	1
RVBD0374c:RVBD0374c	10	NonEssential	6	2875	-5.6484	0.918177	2875	0	2134	0	1
RVBD0375c:RVBD0375c	7	NonEssential	3	3073	-4.8666	0.941818	3073	0	909	0	1
RVBD0376c:RVBD0376c	6	NonEssential	4	2555	-6.1378	0.783429	2555	1	81	7.4222	0.506733
RVBD0377:RVBD0377	13	NonEssential	7	1926	-5.2459	0.660942	1926	1	668	-2.2931	1
RVBD0378:RVBD0378	2	NonEssential	2	1629	-6.5048	0.437743	1629	0	3094	0	1
RVBD0379:secE2	2	NonEssential	2	1330	-5.3071	0.352724	1330	0	3321	0	1
RVBD0380c:RVBD0380c	5	NonEssential	4	2131	-5.852	0.673994	2131	0	3065	0	1
RVBD0381c:RVBD0381c	11	NonEssential	6	2728	-5.6501	0.889359	2728	0	1423	0	1
RVBD0382c:pyrE	22	Essential	14	1871	-5.7344	0.674564	1871	1	247	-1.3266	1
RVBD0383c:RVBD0383c	70	Essential	35	2147	-5.5899	0.749986	2147	3	209	-1.6165	1
RVBD0384c:clpB	169	Essential	118	39	-5.8695	7e-05	39	0	3791	0	1
RVBD0385:RVBD0385	7	NonEssential	7	438	-6.273	0.158741	438	0	3890	0	1
RVBD0386:RVBD0386	10	NonEssential	8	1253	-6.023	0.464491	1253	0	3526	0	1
RVBD0387c:RVBD0387c	16	NonEssential	6	2296	-5.0315	0.770411	2296	0	1515	0	1
RVBD0389:purT	12	NonEssential	5	2832	-5.3022	0.918177	2832	1	535	-2.1419	1
RVBD0390:RVBD0390	8	NonEssential	6	1900	-5.7061	0.626464	1900	0	1237	0	1
RVBD0391:metZ	6	NonEssential	4	866	-5.8219	0.317293	866	0	3318	0	1
RVBD0392c:ndhA	5	NonEssential	3	2567	-5.881	0.771289	2567	0	3111	0	1
RVBD0393:RVBD0393	6	NonEssential	3	2541	-5.5085	0.779571	2541	0	1809	0	1
RVBD0394c:RVBD0394c	7	NonEssential	6	196	-6.5593	0.042481	196	0	3830	0	1
RVBD0395:RVBD0395	7	NonEssential	2	2176	-4.1351	0.700925	2176	0	929	0	1
RVBD0396:RVBD0396	6	NonEssential	5	1193	-5.9473	0.408068	1193	0	2831	0	1
RVBD0397:RVBD0397	6	NonEssential	2	2054	-5.3047	0.660022	2054	0	621	0	1
RVBD0397A:RVBD0397A	6	NonEssential	1	3858	-4.8101	1	3858	0	1216	0	1
RVBD0398c:RVBD0398c	8	NonEssential	4	2536	-5.977	0.804707	2536	0	549	0	1
RVBD0399c:lpqK	8	NonEssential	4	1142	-4.4249	0.423985	1142	0	570	0	1
RVBD0400c:fadE7	8	NonEssential	3	3009	-5.06	0.93624	3009	0	1988	0	1
RVBD0401:RVBD0401	6	NonEssential	3	3247	-5.4982	0.96908	3247	0	2261	0	1
RVBD0402c:mmpL1	32	NonEssential	15	3246	-5.2208	1	3246	0	3532	0	1
RVBD0403c:mmpS1	8	NonEssential	4	2493	-5.3858	0.79031	2493	0	989	0	1
RVBD0404:fadD30	16	NonEssential	11	409	-5.8718	0.166275	409	0	2814	0	1
RVBD0405:pks6	373	Essential	200	1604	-5.5217	0.581791	1604	6	2184	-2.0915	1
RVBD0406c:RVBD0406c	7	NonEssential	6	1336	-6.2218	0.462577	1336	0	3609	0	1
RVBD0407:fgd1	8	NonEssential	6	784	-6.3126	0.28411	784	0	3416	0	1
RVBD0408:pta	19	NonEssential	11	1160	-5.5717	0.440344	1160	0	1754	0	1
RVBD0409:ackA	5	NonEssential	4	1944	-5.8085	0.606808	1944	0	3474	0	1
RVBD0410c:pknG	19	NonEssential	13	1491	-5.5794	0.540676	1491	0	3033	0	1
RVBD0411c:glnH	9	NonEssential	9	163	-6.1243	0.031393	163	0	4022	0	1
RVBD0412c:RVBD0412c	9	NonEssential	5	1058	-5.344	0.392199	1058	0	790	0	1
RVBD0413:mutT3	5	NonEssential	4	286	-4.9892	0.074709	286	0	2594	0	1
RVBD0414c:thiE	48	NonEssential	29	1516	-5.5634	0.565084	1516	0	3692	0	1
RVBD0415:thiO	96	Essential	47	2196	-5.3126	0.760247	2196	0	3907	0	1
RVBD0416:thiS	8	NonEssential	4	2361	-5.265	0.756293	2361	0	2805	0	1
RVBD0417:thiG	77	Essential	41	980	-5.4035	0.382599	980	1	2612	-2.3597	1
RVBD0418:lpqL	6	NonEssential	4	952	-5.8422	0.334242	952	0	2672	0	1
RVBD0419:lpqM	11	NonEssential	8	513	-5.2553	0.197076	513	0	1784	0	1
RVBD0420c:RVBD0420c	5	NonEssential	1	3741	-3.8733	1	3741	0	1172	0	1
RVBD0421c:RVBD0421c	6	NonEssential	3	2283	-5.2459	0.716117	2283	1	282	-1.9429	1
RVBD0422c:thiD	72	NonEssential	39	2076	-5.5545	0.735712	2076	2	254	1.2134	1
RVBD0423c:thiC	143	Essential	72	2916	-5.3994	0.987076	2916	1	1018	-1.3503	1
RVBD0424c:RVBD0424c	3	NonEssential	2	3169	-5.6789	0.900044	3169	0	2510	0	1
RVBD0425c:ctpH	24	NonEssential	13	2608	-5.6264	0.883348	2608	1	525	-1.7058	1
RVBD0426c:RVBD0426c	5	NonEssential	2	3329	-5.49	0.97987	3329	1	289	-2.0467	1
RVBD0427c:xthA	8	NonEssential	4	3097	-5.4673	0.955709	3097	0	594	0	1
RVBD0428c:RVBD0428c	6	NonEssential	4	2191	-3.4537	0.6927	2191	0	2077	0	1
RVBD0429c:def	68	Essential	25	2721	-5.1791	0.936987	2721	2	1152	-2.3169	1
RVBD0430:RVBD0430	22	Essential	11	3032	-5.1346	0.990877	3032	0	1318	0	1
RVBD0431:RVBD0431	8	Essential	5	2231	-5.5573	0.727385	2231	0	3675	0	1
RVBD0432:sodC	6	NonEssential	5	1357	-5.8721	0.443836	1357	0	2830	0	1
RVBD0433:RVBD0433	5	NonEssential	4	724	-5.8835	0.227281	724	0	1161	0	1
RVBD0434:RVBD0434	6	NonEssential	3	2056	-4.3785	0.660131	2056	0	435	0	1
RVBD0435c:RVBD0435c	10	NonEssential	6	2657	-5.4034	0.860836	2657	0	2925	0	1
RVBD0436c:pssA	5	NonEssential	4	936	-6.417	0.332633	936	0	1622	0	1
RVBD0437c:psd	6	NonEssential	4	2671	-5.8639	0.8234	2671	0	3249	0	1
RVBD0438c:moeA2	8	NonEssential	6	1988	-5.7179	0.665913	1988	0	3084	0	1
RVBD0439c:RVBD0439c	5	NonEssential	1	3625	-4.8002	1	3625	0	1427	0	1
RVBD0440:groEL2	106	Essential	13	4021	-4.4628	1	4021	16	23	-2.0206	0.000198
RVBD0441c:RVBD0441c	7	NonEssential	2	2331	-4.1877	0.748652	2331	1	369	-2.1419	1
RVBD0442c:PPE10	8	NonEssential	6	1266	-4.8668	0.448557	1266	0	3088	0	1
RVBD0443:RVBD0443	5	NonEssential	1	3823	-3.6716	1	3823	0	1009	0	1
RVBD0444c:rskA	5	NonEssential	3	3092	-5.7287	0.923731	3092	0	2696	0	1
RVBD0445c:sigK	5	NonEssential	3	2470	-4.7991	0.748652	2470	0	826	0	1
RVBD0446c:RVBD0446c	5	NonEssential	1	2232	-5.1879	0.695606	2232	0	815	0	1
RVBD0447c:ufaA1	6	NonEssential	6	243	-6.1382	0.063032	243	0	3984	0	1
RVBD0448c:RVBD0448c	7	NonEssential	4	2359	-3.798	0.751779	2359	0	1985	0	1
RVBD0449c:RVBD0449c	15	NonEssential	5	3214	-4.7698	1	3214	1	624	-2.1419	1
RVBD0450c:mmpL4	38	NonEssential	18	3420	-5.3413	1	3420	0	2771	0	1
RVBD0451c:mmpS4	6	NonEssential	6	258	-6.2614	0.070724	258	0	3979	0	1
RVBD0452:RVBD0452	9	NonEssential	6	415	-5.3295	0.153851	415	0	1772	0	1
RVBD0453:PPE11	13	NonEssential	10	951	-6.1859	0.355285	951	0	3641	0	1
RVBD0454:RVBD0454	5	NonEssential	3	1227	-5.5959	0.402779	1227	0	1140	0	1
RVBD0455c:RVBD0455c	10	Essential	1	3987	-1.9113	1	3987	3	61	0.69124	0.254862
RVBD0456A:mazF1	3	NonEssential	2	2547	-6.1675	0.717753	2547	0	2148	0	1
RVBD0456B:RVBD0456B	1	NonEssential	1	2701	-6.2713	0.633051	2701	0	2032	0	1
RVBD0456c:echA2	8	NonEssential	5	1860	-5.2801	0.607244	1860	0	3494	0	1
RVBD0457c:RVBD0457c	14	NonEssential	4	3487	-5.1753	1	3487	0	3425	0	1
RVBD0458:RVBD0458	20	NonEssential	12	930	-5.3742	0.361944	930	0	1492	0	1
RVBD0459:RVBD0459	6	NonEssential	2	3262	-5.6198	0.973615	3262	0	2070	0	1
RVBD0460:RVBD0460	7	NonEssential	6	947	-6.0898	0.337931	947	0	2143	0	1
RVBD0461:RVBD0461	7	NonEssential	6	363	-5.2938	0.12345	363	0	3547	0	1
RVBD0462:lpdC	116	Essential	66	1062	-5.5538	0.408068	1062	5	251	-1.9429	1
RVBD0463:RVBD0463	7	NonEssential	4	3049	-5.7493	0.93484	3049	1	162	-1.3266	1
RVBD0464c:RVBD0464c	8	NonEssential	2	3685	-4.8351	1	3685	0	1749	0	1
RVBD0465c:RVBD0465c	12	NonEssential	9	975	-5.8556	0.361944	975	0	2566	0	1
RVBD0466:RVBD0466	6	NonEssential	4	2187	-6.0274	0.6927	2187	0	1277	0	1
RVBD0467:icl1	82	NonEssential	47	1642	-5.487	0.607244	1642	0	3824	0	1
RVBD0468:fadB2	6	NonEssential	3	2748	-3.85	0.850214	2748	0	1442	0	1
RVBD0469:umaA	15	NonEssential	9	1972	-5.6565	0.68443	1972	1	647	-2.142	1
RVBD0470A:RVBD0470A	7	NonEssential	5	1541	-6.3339	0.511148	1541	0	731	0	1
RVBD0470c:pcaA	9	NonEssential	3	3390	-5.4363	1	3390	1	391	-2.0058	1
RVBD0471c:RVBD0471c	5	NonEssential	2	3415	-5.4021	0.99091	3415	0	885	0	1
RVBD0472c:RVBD0472c	9	NonEssential	8	457	-6.1494	0.163421	457	0	3834	0	1
RVBD0473:RVBD0473	8	NonEssential	5	773	-6.1326	0.281236	773	0	1904	0	1
RVBD0474:RVBD0474	6	NonEssential	6	301	-6.3556	0.088761	301	0	3965	0	1
RVBD0475:hbhA	5	NonEssential	1	3498	-3.6759	1	3498	1	353	-2.297	1
RVBD0476:RVBD0476	8	NonEssential	5	2615	-4.5208	0.83002	2615	0	2465	0	1
RVBD0477:RVBD0477	6	NonEssential	3	2435	-4.6852	0.752213	2435	0	2989	0	1
RVBD0478:deoC	5	NonEssential	4	1011	-6.2556	0.358834	1011	0	3517	0	1
RVBD0479c:RVBD0479c	102	Essential	58	1067	-5.6305	0.412049	1067	0	3702	0	1
RVBD0480c:RVBD0480c	7	NonEssential	4	908	-4.6513	0.325468	908	0	2599	0	1
RVBD0481c:RVBD0481c	6	NonEssential	3	824	-5.3126	0.298925	824	1	139	-1.3004	0.903167
RVBD0482:murB	77	Essential	38	2724	-5.064	0.936987	2724	4	287	-2.2067	1
RVBD0483:lprQ	13	NonEssential	8	1658	-5.6693	0.594035	1658	1	217	-1.3503	1
RVBD0484c:RVBD0484c	5	NonEssential	2	3160	-4.7027	0.939665	3160	1	73	8.2233	0.424407
RVBD0485:RVBD0485	8	NonEssential	5	2486	-5.8225	0.786594	2486	0	1184	0	1
RVBD0486:mshA	7	NonEssential	5	2070	-4.6464	0.670481	2070	0	838	0	1
RVBD0487:RVBD0487	8	NonEssential	6	308	-6.5984	0.108652	308	0	3711	0	1
RVBD0488:RVBD0488	7	NonEssential	6	798	-6.3539	0.28453	798	0	3762	0	1
RVBD0489:gpm1	5	Essential	1	3506	-5.4572	1	3506	1	194	-1.6165	1
RVBD0490:senX3	8	NonEssential	5	1637	-5.5697	0.541884	1637	0	3794	0	1
RVBD0491:regX3	5	NonEssential	4	808	-5.6253	0.282675	808	0	3555	0	1
RVBD0492A:RVBD0492A	8	NonEssential	4	2441	-5.815	0.772841	2441	0	1735	0	1
RVBD0492c:RVBD0492c	8	NonEssential	6	1730	-6.179	0.566688	1730	0	3339	0	1
RVBD0493c:RVBD0493c	8	NonEssential	6	328	-4.5092	0.119925	328	0	1509	0	1
RVBD0494:RVBD0494	9	NonEssential	1	3865	-4.8801	1	3865	0	2623	0	1
RVBD0495c:RVBD0495c	7	NonEssential	6	735	-6.0778	0.256038	735	0	1547	0	1
RVBD0496:RVBD0496	8	NonEssential	6	1897	-5.6789	0.622591	1897	1	431	-2.1773	1
RVBD0497:RVBD0497	6	NonEssential	6	160	-6.0866	0.023366	160	0	3999	0	1
RVBD0498:RVBD0498	10	NonEssential	3	3581	-5.2951	1	3581	0	1982	0	1
RVBD0499:RVBD0499	6	NonEssential	3	2609	-5.3446	0.801786	2609	0	1432	0	1
RVBD0500:proC	52	Essential	26	2319	-5.4991	0.823537	2319	0	2543	0	1
RVBD0500A:RVBD0500A	4	NonEssential	3	502	-5.6094	0.149149	502	0	1181	0	1
RVBD0500B:RVBD0500B	1	NonEssential	0	3753	-3.9812	1	3753	0	404	0	1
RVBD0501:galE2	12	NonEssential	3	3770	-4.9823	1	3770	0	3245	0	1
RVBD0502:RVBD0502	9	NonEssential	5	563	-5.1024	0.211668	563	0	2619	0	1
RVBD0503c:cmaA2	10	NonEssential	3	3116	-3.9004	0.973615	3116	0	1849	0	1
RVBD0504c:RVBD0504c	5	NonEssential	4	998	-5.7263	0.352238	998	0	1495	0	1
RVBD0505c:serB1	8	Essential	7	102	-6.533	0.00355	102	0	3006	0	1
RVBD0506:mmpS2	6	NonEssential	4	1188	-5.2345	0.408068	1188	0	2380	0	1
RVBD0507:mmpL2	44	NonEssential	23	2316	-5.5467	0.818508	2316	2	674	-2.2951	1
RVBD0508:RVBD0508	4	NonEssential	3	687	-4.7369	0.20772	687	0	1550	0	1
RVBD0509:hemA	126	Essential	51	3448	-5.2743	1	3448	7	157	-2.2067	1
RVBD0510:hemC	51	Essential	20	3309	-5.0299	1	3309	1	1780	-2.254	1
RVBD0511:hemD	154	Essential	44	3937	-4.764	1	3937	3	1304	-2.142	1
RVBD0512:hemB	76	Essential	55	108	-5.8625	0.009507	108	0	4052	0	1
RVBD0513:RVBD0513	7	NonEssential	5	670	-6.4388	0.234881	670	0	3356	0	1
RVBD0514:RVBD0514	4	NonEssential	0	3938	-4.1754	1	3938	0	371	0	1
RVBD0515:RVBD0515	3	NonEssential	1	3664	-5.3107	1	3664	0	1211	0	1
RVBD0516c:RVBD0516c	5	NonEssential	3	1536	-5.5397	0.47204	1536	0	2407	0	1
RVBD0517:RVBD0517	16	NonEssential	11	1082	-5.6127	0.416726	1082	0	2922	0	1
RVBD0518:RVBD0518	12	NonEssential	9	1269	-5.7719	0.468866	1269	0	840	0	1
RVBD0519c:RVBD0519c	11	NonEssential	7	691	-5.4566	0.256038	691	0	1401	0	1
RVBD0520:RVBD0520	6	NonEssential	4	1168	-5.7791	0.402779	1168	0	3435	0	1
RVBD0521:RVBD0521	6	NonEssential	5	1468	-5.7827	0.47204	1468	0	829	0	1
RVBD0522:gabP	28	NonEssential	19	412	-5.8664	0.173155	412	1	325	-1.3503	1
RVBD0523c:RVBD0523c	5	NonEssential	3	2745	-5.6305	0.823785	2745	0	3119	0	1
RVBD0524:hemL	138	Essential	34	2927	-4.8232	0.988773	2927	5	542	-2.0058	1
RVBD0525:RVBD0525	36	Essential	10	3491	-4.5704	1	3491	2	547	-0.81067	1
RVBD0526:RVBD0526	58	Essential	13	3374	-4.8089	1	3374	1	1349	-1.9429	1
RVBD0527:ccdA	114	Essential	32	3516	-5.1937	1	3516	6	167	-1.8774	1
RVBD0528:RVBD0528	161	Essential	51	3812	-5.0811	1	3812	2	1379	-1.7027	1
RVBD0529:ccsA	150	Essential	42	3890	-4.9292	1	3890	2	1701	-2.0467	1
RVBD0530:RVBD0530	11	NonEssential	6	2112	-5.3295	0.695748	2112	0	3123	0	1
RVBD0530Ac:RVBD0530Ac	5	NonEssential	3	1393	-5.7633	0.440344	1393	0	1326	0	1
RVBD0531:RVBD0531	5	NonEssential	1	3766	-5.4297	1	3766	0	1239	0	1
RVBD0532:PE-PGRS6	9	NonEssential	4	2653	-4.7023	0.85474	2653	0	2662	0	1
RVBD0533c:fabH	7	NonEssential	6	919	-5.7677	0.328716	919	0	3814	0	1
RVBD0534c:menA	75	Essential	47	370	-5.8472	0.149149	370	0	3239	0	1
RVBD0535:pnp	12	NonEssential	9	570	-6.0243	0.219862	570	0	3815	0	1
RVBD0536:galE3	5	NonEssential	2	2008	-4.8098	0.633291	2008	0	569	0	1
RVBD0537c:RVBD0537c	9	NonEssential	6	786	-5.3571	0.301168	786	0	2146	0	1
RVBD0538:RVBD0538	11	NonEssential	5	3411	-5.6372	1	3411	0	1704	0	1
RVBD0539:RVBD0539	7	NonEssential	4	567	-4.5704	0.210766	567	0	2467	0	1
RVBD0540:RVBD0540	5	NonEssential	2	3497	-5.1316	1	3497	0	1025	0	1
RVBD0541c:RVBD0541c	13	NonEssential	12	57	-7.9613	7e-05	57	0	2791	0	1
RVBD0542c:menE	85	Essential	41	3078	-5.3268	1	3078	0	3165	0	1
RVBD0543c:RVBD0543c	36	Essential	31	61	-6.2727	7e-05	61	0	4053	0	1
RVBD0544c:RVBD0544c	6	NonEssential	5	1430	-6.0353	0.466057	1430	0	2152	0	1
RVBD0545c:pitA	6	NonEssential	2	3391	-5.2503	1	3391	0	919	0	1
RVBD0546c:RVBD0546c	8	NonEssential	3	3267	-5.3858	0.990922	3267	0	735	0	1
RVBD0547c:RVBD0547c	6	NonEssential	3	954	-4.284	0.334242	954	0	2734	0	1
RVBD0548c:menB	98	Essential	58	932	-5.556	0.363308	932	1	2611	-2.1773	1
RVBD0549c:RVBD0549c	5	NonEssential	0	3928	-4.5997	1	3928	0	1534	0	1
RVBD0550c:RVBD0550c	2	NonEssential	0	3752	-5.097	1	3752	0	1388	0	1
RVBD0551c:fadD8	9	NonEssential	6	1707	-5.8349	0.585039	1707	0	2677	0	1
RVBD0552:RVBD0552	17	Essential	9	2332	-5.4486	0.780149	2332	0	1604	0	1
RVBD0553:menC	98	Essential	50	2447	-5.2762	0.839895	2447	3	1031	-2.254	1
RVBD0554:bpoC	11	NonEssential	10	383	-5.4673	0.148673	383	0	3980	0	1
RVBD0555:menD	117	Essential	62	2575	-5.4077	0.879939	2575	1	1530	-1.6165	1
RVBD0556:RVBD0556	56	NonEssential	35	142	-5.8576	0.025572	142	1	645	-1.4366	1
RVBD0557:mgtA	8	NonEssential	7	723	-5.2825	0.251075	723	0	2739	0	1
RVBD0558:menH	58	Essential	29	2977	-5.357	0.991167	2977	1	2176	-2.3597	1
RVBD0559c:RVBD0559c	5	NonEssential	3	1488	-5.6925	0.468249	1488	0	1290	0	1
RVBD0560c:RVBD0560c	5	NonEssential	1	3170	-5.0525	0.941404	3170	0	646	0	1
RVBD0561c:RVBD0561c	13	NonEssential	8	1585	-4.974	0.565084	1585	0	832	0	1
RVBD0562:grcC1	75	Essential	31	3284	-5.1686	1	3284	0	2616	-2.4076	1
RVBD0563:htpX	10	NonEssential	6	2607	-5.0069	0.846915	2607	0	2986	0	1
RVBD0564c:gpdA1	8	NonEssential	3	3285	-6.1717	0.993824	3285	1	458	-2.3308	1
RVBD0565c:RVBD0565c	13	NonEssential	10	1059	-5.5917	0.400616	1059	0	3783	0	1
RVBD0566c:RVBD0566c	4	NonEssential	3	1645	-4.155	0.507339	1645	0	916	0	1
RVBD0567:RVBD0567	15	NonEssential	9	2573	-5.5074	0.860781	2573	0	2870	0	1
RVBD0568:cyp135B1	6	NonEssential	5	441	-5.3863	0.149149	441	0	2052	0	1
RVBD0569:RVBD0569	4	NonEssential	4	635	-5.5626	0.187352	635	0	3802	0	1
RVBD0570:nrdZ	12	NonEssential	5	3195	-5.4281	0.995604	3195	0	2826	0	1
RVBD0571c:RVBD0571c	6	NonEssential	5	1484	-5.612	0.474428	1484	0	2997	0	1
RVBD0572c:RVBD0572c	6	NonEssential	3	2702	-5.6223	0.839024	2702	0	715	0	1
RVBD0573c:pncB2	13	NonEssential	7	3122	-5.5917	0.988393	3122	0	2367	0	1
RVBD0574c:RVBD0574c	15	NonEssential	10	1946	-5.789	0.673703	1946	0	994	0	1
RVBD0575c:RVBD0575c	8	NonEssential	5	1678	-4.9837	0.555771	1678	0	2671	0	1
RVBD0576:RVBD0576	13	NonEssential	9	1494	-5.8267	0.538908	1494	0	3166	0	1
RVBD0577:TB27.3	7	NonEssential	2	2685	-4.8478	0.841215	2685	0	541	0	1
RVBD0578c:PE-PGRS7	6	NonEssential	3	2907	-3.8733	0.895926	2907	0	1047	0	1
RVBD0579:RVBD0579	8	NonEssential	5	1836	-6.2335	0.604142	1836	0	1903	0	1
RVBD0580c:RVBD0580c	16	NonEssential	7	1766	-4.7939	0.641301	1766	2	90	-1.4307	0.658525
RVBD0581:RVBD0581	2	NonEssential	2	654	-6.3912	0.154304	654	0	3525	0	1
RVBD0582:vapC26	7	NonEssential	5	1661	-6.0244	0.542511	1661	0	489	0	1
RVBD0583c:lpqN	5	NonEssential	5	309	-4.7226	0.079974	309	0	3961	0	1
RVBD0584:RVBD0584	19	NonEssential	14	787	-5.8101	0.319264	787	0	3716	0	1
RVBD0585c:RVBD0585c	20	NonEssential	15	508	-5.4437	0.210766	508	0	2963	0	1
RVBD0586:mce2R	6	NonEssential	6	720	-5.968	0.252603	720	0	3756	0	1
RVBD0587:yrbE2A	6	NonEssential	3	3293	-5.6568	0.982316	3293	0	1686	0	1
RVBD0588:yrbE2B	12	NonEssential	10	743	-5.8767	0.282675	743	0	3050	0	1
RVBD0589:mce2A	15	NonEssential	11	886	-5.9906	0.340805	886	0	3261	0	1
RVBD0590:mce2B	6	NonEssential	3	3384	-5.137	1	3384	0	2320	0	1
RVBD0590A:RVBD0590A	5	NonEssential	4	1047	-6.2061	0.363392	1047	0	3536	0	1
RVBD0591:mce2C	18	NonEssential	11	260	-4.9419	0.09435	260	0	1742	0	1
RVBD0592:mce2D	15	NonEssential	6	3624	-5.1093	1	3624	0	1848	0	1
RVBD0593:lprL	12	NonEssential	7	834	-5.2579	0.322709	834	0	3686	0	1
RVBD0594:mce2F	19	NonEssential	8	3134	-5.1634	1	3134	0	3188	0	1
RVBD0595c:vapC4	2	NonEssential	1	3440	-4.1009	0.918177	3440	0	1766	0	1
RVBD0596c:RVBD0596c	5	NonEssential	1	3631	-4.7202	1	3631	0	1363	0	1
RVBD0597c:RVBD0597c	7	NonEssential	2	2952	-4.6319	0.907355	2952	0	2131	0	1
RVBD0598c:vapC27	6	NonEssential	3	2249	-4.7448	0.71303	2249	0	1957	0	1
RVBD0599c:RVBD0599c	5	NonEssential	3	1079	-5.3571	0.366129	1079	0	2064	0	1
RVBD0600c:RVBD0600c	7	NonEssential	5	2143	-5.2868	0.695648	2143	0	3104	0	1
RVBD0601c:RVBD0601c	5	NonEssential	3	2614	-6.0288	0.787979	2614	0	2351	0	1
RVBD0602c:tcrA	5	NonEssential	3	2099	-5.5572	0.671695	2099	0	2277	0	1
RVBD0603:RVBD0603	6	NonEssential	3	3454	-3.3137	1	3454	0	1430	0	1
RVBD0604:lpqO	12	NonEssential	7	1592	-4.3256	0.57336	1592	0	1405	0	1
RVBD0605:RVBD0605	7	NonEssential	5	1211	-6.5851	0.432147	1211	0	3485	0	1
RVBD0606:RVBD0606	7	NonEssential	4	2292	-5.217	0.739352	2292	0	2394	0	1
RVBD0607:RVBD0607	8	NonEssential	6	550	-6.3335	0.197993	550	0	1891	0	1
RVBD0608:vapB28	5	NonEssential	2	2818	-4.5704	0.841728	2818	0	1976	0	1
RVBD0609:vapC28	5	NonEssential	4	2185	-6.0687	0.685426	2185	0	3213	0	1
RVBD0609A:RVBD0609A	4	NonEssential	0	3961	-4.1909	1	3961	0	1122	0	1
RVBD0610c:RVBD0610c	7	NonEssential	5	545	-5.7692	0.198029	545	0	2085	0	1
RVBD0611c:RVBD0611c	5	NonEssential	2	3426	-5.217	0.99196	3426	0	1815	0	1
RVBD0612:RVBD0612	7	NonEssential	4	2281	-4.5784	0.737409	2281	1	250	-1.7119	1
RVBD0613c:RVBD0613c	17	NonEssential	10	2014	-5.6371	0.696613	2014	0	2494	0	1
RVBD0614:RVBD0614	9	NonEssential	6	526	-5.4673	0.193097	526	0	3112	0	1
RVBD0615:RVBD0615	5	NonEssential	5	813	-6.0937	0.284043	813	0	3689	0	1
RVBD0616A:RVBD0616A	2	NonEssential	1	2971	-6.0837	0.774576	2971	0	2154	0	1
RVBD0616c:RVBD0616c	7	NonEssential	6	1349	-5.5193	0.468249	1349	0	3779	0	1
RVBD0617:vapC29	6	NonEssential	3	2931	-6.0599	0.90061	2931	1	376	-2.254	1
RVBD0618:galTa	5	NonEssential	4	1978	-5.2898	0.622591	1978	0	3075	0	1
RVBD0619:galTb	6	NonEssential	4	2178	-5.7671	0.689011	2178	0	3286	0	1
RVBD0620:galK	5	NonEssential	2	3660	-4.2135	1	3660	0	827	0	1
RVBD0621:RVBD0621	11	NonEssential	8	600	-5.8683	0.223642	600	0	969	0	1
RVBD0622:RVBD0622	14	NonEssential	8	1133	-5.7504	0.423985	1133	0	2561	0	1
RVBD0623:vapB30	2	NonEssential	1	2141	-7.5266	0.585039	2141	1	106	1.4751	0.472528
RVBD0624:vapC30	9	NonEssential	7	1038	-5.8835	0.378281	1038	0	2644	0	1
RVBD0625c:RVBD0625c	8	NonEssential	7	993	-5.7373	0.361554	993	0	697	0	1
RVBD0626:RVBD0626	5	NonEssential	2	3310	-4.4574	0.976884	3310	0	1240	0	1
RVBD0627:RVBD0627	5	NonEssential	1	3375	-5.2936	0.987335	3375	0	937	0	1
RVBD0628c:RVBD0628c	10	NonEssential	3	3792	-5.1458	1	3792	0	1813	0	1
RVBD0629c:recD	6	NonEssential	5	1746	-5.7539	0.57336	1746	0	3293	0	1
RVBD0630c:recB	11	NonEssential	6	2659	-5.1762	0.870102	2659	0	1519	0	1
RVBD0631c:recC	16	NonEssential	10	418	-5.1548	0.169332	418	0	1826	0	1
RVBD0632c:echA3	9	NonEssential	6	990	-5.6743	0.358399	990	0	2114	0	1
RVBD0633c:RVBD0633c	7	NonEssential	2	3446	-5.2255	1	3446	0	1464	0	1
RVBD0634A:RVBD0634A	5	NonEssential	4	1259	-4.543	0.410345	1259	0	1934	0	1
RVBD0634B:rpmG2	11	Essential	4	3706	-4.9998	1	3706	0	2336	0	1
RVBD0634c:RVBD0634c	11	NonEssential	6	2365	-5.2753	0.777587	2365	0	751	0	1
RVBD0635:hadA	30	Essential	11	3273	-4.7468	1	3273	2	299	-1.9142	1
RVBD0636:hadB	23	Essential	11	1096	-5.3528	0.423985	1096	1	256	-1.3266	1
RVBD0637:hadC	7	Essential	5	168	-5.6414	0.028811	168	0	2996	0	1
RVBD0638:secE1	34	Essential	5	3791	-4.3301	1	3791	3	216	-2.3169	1
RVBD0639:nusG	50	Essential	7	3940	-4.3919	1	3940	8	38	-1.6612	0.048515
RVBD0640:rplK	6	Essential	1	3864	-4.4251	1	3864	0	640	0	1
RVBD0641:rplA	57	Essential	13	3765	-4.6662	1	3765	1	956	-1.7058	1
RVBD0642c:mmaA4	8	NonEssential	2	1777	-4.1244	0.581791	1777	0	1002	0	1
RVBD0643c:mmaA3	8	NonEssential	5	1996	-5.6915	0.667829	1996	0	3005	0	1
RVBD0644c:mmaA2	10	NonEssential	2	3733	-5.0569	1	3733	0	3415	0	1
RVBD0645c:mmaA1	12	NonEssential	6	1990	-5.5193	0.668083	1990	0	966	0	1
RVBD0646c:lipG	9	NonEssential	6	2432	-5.4242	0.789176	2432	0	3322	0	1
RVBD0647c:RVBD0647c	108	Essential	52	1392	-5.455	0.51035	1392	1	1676	-1.7119	1
RVBD0648:RVBD0648	13	NonEssential	7	2589	-5.2157	0.858114	2589	0	2871	0	1
RVBD0649:fabD2	8	NonEssential	3	3196	-5.3232	0.978748	3196	0	1700	0	1
RVBD0650:RVBD0650	8	NonEssential	4	3272	-5.3683	0.991167	3272	0	1608	0	1
RVBD0651:rplJ	7	Essential	1	3723	-4.1727	1	3723	0	853	0	1
RVBD0652:rplL	25	Essential	5	3920	-4.7466	1	3920	1	577	-1.7119	1
RVBD0653c:RVBD0653c	7	NonEssential	1	1713	-4.6051	0.563005	1713	0	658	0	1
RVBD0654:RVBD0654	9	NonEssential	4	3047	-5.0735	0.954223	3047	1	83	8.1284	0.616948
RVBD0655:mkl	10	NonEssential	0	4018	-5.313	1	4018	7	7	4.1437	0.000198
RVBD0656c:vapC6	7	NonEssential	4	2164	-5.2686	0.698321	2164	0	3105	0	1
RVBD0658c:RVBD0658c	11	NonEssential	4	3637	-5.5643	1	3637	0	1182	0	1
RVBD0659c:RVBD0659c	5	NonEssential	1	3750	-5.1926	1	3750	0	825	0	1
RVBD0660c:mazE2	5	NonEssential	2	2906	-4.9077	0.867468	2906	0	1292	0	1
RVBD0661c:RVBD0661c	5	NonEssential	2	2989	-5.5094	0.895926	2989	1	253	-1.9429	1
RVBD0662c:vapB7	8	NonEssential	6	1848	-5.7886	0.606808	1848	0	2318	0	1
RVBD0663:atsD	16	NonEssential	8	1899	-5.3158	0.672504	1899	0	2470	0	1
RVBD0665:vapC8	5	NonEssential	1	3836	-5.3497	1	3836	0	3132	0	1
RVBD0667:rpoB	309	Essential	80	3014	-4.923	1	3014	31	19	-2.0058	0.000198
RVBD0668:rpoC	276	Essential	70	3207	-5.0628	1	3207	22	26	-1.9744	0.00495
RVBD0669c:RVBD0669c	20	NonEssential	9	2938	-5.1008	0.96908	2938	0	3768	0	1
RVBD0670:end	7	NonEssential	5	1299	-5.1874	0.451539	1299	0	2468	0	1
RVBD0671:lpqP	6	NonEssential	4	2399	-5.2429	0.743104	2399	0	3244	0	1
RVBD0672:fadE8	14	NonEssential	6	3314	-5.2924	1	3314	0	2471	0	1
RVBD0673:echA4	8	NonEssential	4	2689	-5.4329	0.853453	2689	0	3187	0	1
RVBD0674:RVBD0674	7	NonEssential	4	612	-4.9614	0.217386	612	0	3077	0	1
RVBD0675:echA5	5	NonEssential	3	2073	-4.9555	0.653433	2073	0	652	0	1
RVBD0676c:mmpL5	33	NonEssential	11	3046	-4.7466	0.997472	3046	0	2104	0	1
RVBD0677c:mmpS5	7	NonEssential	4	2656	-5.0525	0.833773	2656	0	3092	0	1
RVBD0678:RVBD0678	6	NonEssential	3	3283	-5.5973	0.979552	3283	0	1776	0	1
RVBD0679c:RVBD0679c	5	NonEssential	2	2800	-5.1316	0.839024	2800	0	1850	0	1
RVBD0680c:RVBD0680c	5	NonEssential	3	676	-4.839	0.219092	676	0	491	0	1
RVBD0681:RVBD0681	5	NonEssential	1	3527	-4.1366	1	3527	0	1448	0	1
RVBD0682:rpsL	24	Essential	3	3908	-3.455	1	3908	4	70	-1.8432	0.506733
RVBD0683:rpsG	24	Essential	2	3970	-4.3402	1	3970	1	804	-2.0354	1
RVBD0684:fusA1	164	Essential	18	4002	-4.4995	1	4002	11	60	-1.9429	0.664999
RVBD0685:tuf	109	Essential	18	4036	-4.4601	1	4036	4	411	-1.8838	1
RVBD0686:RVBD0686	6	NonEssential	3	2348	-5.4717	0.732641	2348	0	1964	0	1
RVBD0687:RVBD0687	6	NonEssential	3	2884	-4.3732	0.893383	2884	0	3223	0	1
RVBD0688:RVBD0688	8	NonEssential	7	1028	-5.3958	0.377816	1028	0	3496	0	1
RVBD0689c:RVBD0689c	3	NonEssential	0	3775	-4.764	1	3775	0	1362	0	1
RVBD0690c:RVBD0690c	6	NonEssential	4	1233	-5.8446	0.421456	1233	0	2888	0	1
RVBD0691A:RVBD0691A	4	NonEssential	4	710	-4.1399	0.212718	710	0	3758	0	1
RVBD0691c:RVBD0691c	6	NonEssential	5	863	-6.3131	0.307873	863	0	448	0	1
RVBD0692:RVBD0692	6	NonEssential	5	1628	-6.3067	0.527819	1628	0	2188	0	1
RVBD0693:pqqE	10	NonEssential	5	2094	-5.2426	0.6948	2094	0	3038	0	1
RVBD0694:lldD1	11	NonEssential	7	1153	-4.3729	0.42665	1153	0	3730	0	1
RVBD0695:RVBD0695	5	NonEssential	3	1052	-6.4103	0.363655	1052	0	526	0	1
RVBD0696:RVBD0696	12	NonEssential	8	587	-5.8101	0.223642	587	0	886	0	1
RVBD0697:RVBD0697	152	NonEssential	80	2243	-5.4673	0.779571	2243	0	3932	0	1
RVBD0698:RVBD0698	6	NonEssential	4	1401	-5.3988	0.451627	1401	0	3329	0	1
RVBD0699:RVBD0699	4	NonEssential	0	3841	-5.5346	1	3841	0	726	0	1
RVBD0700:rpsJ	20	Essential	2	3764	-4.2877	1	3764	0	1386	0	1
RVBD0701:rplC	48	Essential	2	3966	-4.0323	1	3966	5	92	-1.973	0.938056
RVBD0702:rplD	48	Essential	3	3956	-4.3817	1	3956	2	729	-2.12	1
RVBD0703:rplW	20	Essential	2	3912	-4.6378	1	3912	1	847	-2.2067	1
RVBD0704:rplB	26	Essential	2	3999	-4.3435	1	3999	3	141	-2.142	1
RVBD0705:rpsS	16	Essential	4	3779	-4.6378	1	3779	1	606	-2.0354	1
RVBD0706:rplV	24	Essential	0	4051	-4.1123	1	4051	2	342	-2.305	1
RVBD0707:rpsC	52	Essential	2	4031	-4.513	1	4031	6	55	-1.8274	0.455291
RVBD0708:rplP	23	Essential	4	3854	-5.0229	1	3854	2	269	-0.66361	1
RVBD0709:rpmC	14	Essential	1	3968	-3.6943	1	3968	0	921	0	1
RVBD0710:rpsQ	10	Essential	0	3997	-4.0231	1	3997	0	1120	0	1
RVBD0711:atsA	21	NonEssential	14	752	-5.8988	0.307873	752	0	2418	0	1
RVBD0712:RVBD0712	6	NonEssential	6	376	-5.9901	0.119925	376	0	3927	0	1
RVBD0713:RVBD0713	7	NonEssential	5	2268	-5.4415	0.736832	2268	0	745	0	1
RVBD0714:rplN	11	Essential	4	3457	-4.4891	1	3457	0	1207	0	1
RVBD0715:rplX	2	NonEssential	1	3518	-4.9437	0.945527	3518	0	702	0	1
RVBD0716:rplE	39	Essential	3	4014	-3.8595	1	4014	4	122	-1.8054	1
RVBD0717:rpsN1	12	Essential	3	3834	-4.7375	1	3834	0	2530	0	1
RVBD0718:rpsH	29	Essential	1	4048	-4.3301	1	4048	2	212	-1.3004	1
RVBD0719:rplF	35	Essential	1	4012	-4.362	1	4012	3	227	0.5015	1
RVBD0720:rplR	14	Essential	0	4032	-4.0105	1	4032	3	77	-2.1419	0.471405
RVBD0721:rpsE	33	Essential	1	4042	-3.9737	1	4042	5	57	-1.9429	0.389572
RVBD0723:rplO	25	Essential	3	3995	-4.3564	1	3995	0	2679	0	1
RVBD0724:sppA	14	NonEssential	3	3644	-4.7023	1	3644	2	172	-1.9428	1
RVBD0725c:RVBD0725c	6	NonEssential	2	973	-5.4993	0.338072	973	0	2260	0	1
RVBD0726c:RVBD0726c	13	NonEssential	7	2866	-5.2125	0.93402	2866	0	1250	0	1
RVBD0727c:fucA	5	NonEssential	3	2837	-5.8714	0.849471	2837	0	2371	0	1
RVBD0728c:serA2	6	NonEssential	3	1105	-5.6651	0.382599	1105	0	687	0	1
RVBD0729:xylB	8	NonEssential	4	2846	-4.9316	0.897157	2846	0	605	0	1
RVBD0730:RVBD0730	7	NonEssential	3	2872	-4.8205	0.888682	2872	0	809	0	1
RVBD0731c:RVBD0731c	6	NonEssential	4	2712	-4.8089	0.839024	2712	0	2492	0	1
RVBD0732:secY	166	Essential	25	3900	-4.3349	1	3900	17	27	-1.9429	0.005127
RVBD0733:adk	6	Essential	3	2321	-5.3778	0.726806	2321	0	1824	0	1
RVBD0734:mapA	7	NonEssential	4	1864	-6.2944	0.603737	1864	0	3662	0	1
RVBD0735:sigL	5	NonEssential	1	1407	-4.9874	0.443836	1407	0	2004	0	1
RVBD0736:rslA	8	NonEssential	5	1398	-4.872	0.47128	1398	0	1197	0	1
RVBD0737:RVBD0737	5	NonEssential	3	2944	-5.8276	0.879939	2944	0	2031	0	1
RVBD0738:RVBD0738	6	NonEssential	3	2812	-5.8225	0.869508	2812	0	704	0	1
RVBD0739:RVBD0739	6	NonEssential	6	241	-6.7448	0.063032	241	0	3792	0	1
RVBD0740:RVBD0740	6	NonEssential	5	1461	-5.4355	0.47128	1461	0	3020	0	1
RVBD0741:RVBD0741	7	NonEssential	3	2129	-5.1325	0.688893	2129	0	1302	0	1
RVBD0742:PE-PGRS8	5	NonEssential	3	1641	-5.6073	0.522886	1641	1	354	-2.297	1
RVBD0743c:RVBD0743c	10	NonEssential	6	2322	-5.8971	0.762082	2322	0	2369	0	1
RVBD0744c:RVBD0744c	5	NonEssential	4	1497	-5.1542	0.468866	1497	0	2853	0	1
RVBD0745:RVBD0745	5	NonEssential	3	2664	-5.1996	0.801059	2664	0	892	0	1
RVBD0746:PE-PGRS9	8	NonEssential	5	1721	-6.1856	0.565084	1721	0	2009	0	1
RVBD0747:PE-PGRS10	8	NonEssential	6	1976	-5.6743	0.660022	1976	0	965	0	1
RVBD0748:vapB31	3	NonEssential	1	3529	-5.6007	0.981785	3529	0	1406	0	1
RVBD0749:vapC31	7	NonEssential	4	969	-6.1135	0.346007	969	0	1159	0	1
RVBD0749A:RVBD0749A	3	NonEssential	1	3519	-4.6599	0.979552	3519	0	1230	0	1
RVBD0750:RVBD0750	3	NonEssential	0	3828	-4.7354	1	3828	0	720	0	1
RVBD0751c:mmsB	6	NonEssential	4	1951	-5.8423	0.633051	1951	0	3144	0	1
RVBD0752c:fadE9	8	NonEssential	6	596	-6.4682	0.21574	596	0	3894	0	1
RVBD0753c:mmsA	9	NonEssential	6	637	-6.4155	0.234881	637	0	1174	0	1
RVBD0754:PE-PGRS11	6	NonEssential	4	1788	-5.8171	0.588296	1788	0	1900	0	1
RVBD0755A:RVBD0755A	4	NonEssential	2	2206	-6.0697	0.659338	2206	0	2857	0	1
RVBD0755c:PPE12	18	NonEssential	10	2406	-5.2686	0.807145	2406	0	2101	0	1
RVBD0756c:RVBD0756c	7	NonEssential	3	3289	-5.3398	0.990877	3289	0	2444	0	1
RVBD0757:phoP	7	Essential	3	2774	-5.2503	0.858809	2774	0	2476	0	1
RVBD0758:phoR	10	NonEssential	10	73	-6.6061	0.000193	73	0	4048	0	1
RVBD0759c:RVBD0759c	5	NonEssential	2	3549	-5.4554	1	3549	0	1393	0	1
RVBD0760c:RVBD0760c	6	NonEssential	3	2177	-4.8733	0.68884	2177	0	1474	0	1
RVBD0761c:adhB	7	NonEssential	6	700	-5.7975	0.243716	700	0	3243	0	1
RVBD0762c:RVBD0762c	8	NonEssential	6	959	-5.3616	0.350177	959	0	3483	0	1
RVBD0763c:RVBD0763c	5	NonEssential	1	3771	-5.1569	1	3771	0	423	0	1
RVBD0764c:cyp51	21	NonEssential	11	2424	-5.2157	0.822201	2424	0	3741	0	1
RVBD0765c:RVBD0765c	7	NonEssential	6	1098	-3.6194	0.391745	1098	0	3678	0	1
RVBD0766c:cyp123	16	NonEssential	8	2626	-5.6138	0.870601	2626	0	3836	0	1
RVBD0767c:RVBD0767c	7	NonEssential	2	3654	-4.3864	1	3654	0	1830	0	1
RVBD0768:aldA	14	NonEssential	9	2053	-5.0874	0.69629	2053	1	555	-2.0354	1
RVBD0769:RVBD0769	6	NonEssential	4	1024	-4.1046	0.35871	1024	0	1844	0	1
RVBD0770:RVBD0770	5	NonEssential	1	3661	-5.1937	1	3661	0	2316	0	1
RVBD0771:RVBD0771	6	NonEssential	4	2194	-3.3157	0.693113	2194	0	2535	0	1
RVBD0772:purD	125	Essential	56	3146	-5.2687	1	3146	4	219	-1.5192	1
RVBD0773c:ggtA	16	NonEssential	9	1832	-5.1487	0.657677	1832	0	1872	0	1
RVBD0774c:RVBD0774c	8	NonEssential	7	369	-5.5584	0.137771	369	0	1915	0	1
RVBD0775:RVBD0775	6	NonEssential	6	426	-6.0624	0.142743	426	0	3904	0	1
RVBD0776c:RVBD0776c	7	NonEssential	5	2108	-5.7877	0.676655	2108	0	1665	0	1
RVBD0777:purB	92	Essential	16	3784	-4.3084	1	3784	5	175	-1.8411	1
RVBD0778:cyp126	8	NonEssential	5	2315	-5.9204	0.748652	2315	0	2398	0	1
RVBD0779c:RVBD0779c	8	NonEssential	5	2029	-6.1494	0.672504	2029	0	3024	0	1
RVBD0780:purC	103	Essential	58	1868	-5.4336	0.670481	1868	1	1256	-1.5642	1
RVBD0781:ptrBa	7	NonEssential	6	1298	-5.8835	0.451539	1298	0	1628	0	1
RVBD0782:ptrBb	14	NonEssential	9	1324	-4.9989	0.483242	1324	0	3847	0	1
RVBD0783c:emrB	22	NonEssential	11	2520	-4.9866	0.849471	2520	0	2962	0	1
RVBD0784:RVBD0784	8	NonEssential	5	1533	-5.8169	0.510184	1533	0	2903	0	1
RVBD0785:RVBD0785	19	NonEssential	10	411	-5.5531	0.172143	411	1	357	-1.561	1
RVBD0786c:RVBD0786c	7	NonEssential	4	2393	-5.4613	0.764574	2393	0	1609	0	1
RVBD0787:RVBD0787	8	NonEssential	5	667	-5.3394	0.234881	667	0	2994	0	1
RVBD0787A:RVBD0787A	14	Essential	6	3561	-5.2743	1	3561	1	459	-1.9031	1
RVBD0788:purQ	80	Essential	36	2708	-5.1581	0.934251	2708	0	3985	0	1
RVBD0789c:RVBD0789c	10	NonEssential	6	2580	-5.1581	0.841215	2580	0	3114	0	1
RVBD0790c:RVBD0790c	6	NonEssential	6	208	-6.9402	0.044041	208	0	3878	0	1
RVBD0791c:RVBD0791c	12	NonEssential	7	2166	-5.9658	0.724154	2166	0	2266	0	1
RVBD0792c:RVBD0792c	7	NonEssential	5	2179	-5.7195	0.701035	2179	0	3032	0	1
RVBD0793:RVBD0793	5	NonEssential	3	3145	-5.6871	0.938584	3145	0	1198	0	1
RVBD0794c:RVBD0794c	11	NonEssential	6	2106	-5.4105	0.6948	2106	0	2091	0	1
RVBD0795:RVBD0795	2	NonEssential	1	845	-4.896	0.19519	845	0	1354	0	1
RVBD0796:RVBD0796	5	Essential	3	697	-4.7737	0.223642	697	0	1168	0	1
RVBD0797:RVBD0797	5	NonEssential	3	1855	-4.2889	0.576261	1855	0	1189	0	1
RVBD0798c:cfp29	5	NonEssential	3	2142	-5.2251	0.676022	2142	0	421	0	1
RVBD0799c:RVBD0799c	17	NonEssential	8	3084	-5.0631	0.990922	3084	0	3648	0	1
RVBD0800:pepC	12	NonEssential	9	734	-6.2556	0.276763	734	0	1403	0	1
RVBD0801:RVBD0801	5	NonEssential	2	3496	-4.6599	1	3496	0	603	0	1
RVBD0802c:RVBD0802c	7	NonEssential	6	1073	-6.2707	0.378123	1073	1	228	-1.6165	1
RVBD0803:purL	221	Essential	88	3754	-4.9853	1	3754	3	302	-1.3004	1
RVBD0804:RVBD0804	6	NonEssential	4	519	-5.7692	0.177357	519	0	905	0	1
RVBD0805:RVBD0805	6	NonEssential	4	815	-5.7771	0.291749	815	0	2342	0	1
RVBD0806c:cpsY	29	NonEssential	13	2063	-5.4588	0.739548	2063	0	2057	0	1
RVBD0807:RVBD0807	8	NonEssential	3	1775	-5.2162	0.581791	1775	0	2916	0	1
RVBD0808:purF	131	Essential	30	2937	-4.9424	0.989048	2937	9	88	-2.1419	1
RVBD0809:purM	72	Essential	27	1797	-5.0735	0.656061	1797	0	3482	0	1
RVBD0810c:RVBD0810c	23	Essential	8	2735	-5.3737	0.915425	2735	1	467	-1.6165	1
RVBD0811c:RVBD0811c	99	Essential	53	2460	-5.454	0.843448	2460	1	2226	-2.0058	1
RVBD0812:RVBD0812	98	NonEssential	34	2674	-5.2472	0.913166	2674	3	156	-1.3004	1
RVBD0813c:RVBD0813c	9	NonEssential	7	162	-6.1034	0.029004	162	0	1351	0	1
RVBD0814c:sseC2	7	NonEssential	5	2284	-5.7186	0.737409	2284	0	3589	0	1
RVBD0815c:cysA2	10	NonEssential	7	1581	-5.5375	0.541884	1581	0	3828	0	1
RVBD0816c:thiX	6	NonEssential	3	2043	-5.3621	0.660022	2043	0	1715	0	1
RVBD0817c:RVBD0817c	75	NonEssential	55	56	-5.9514	7e-05	56	1	788	-1.4366	1
RVBD0818:RVBD0818	8	NonEssential	6	1643	-5.8176	0.541884	1643	0	1508	0	1
RVBD0819:mshD	7	NonEssential	5	662	-5.938	0.234881	662	0	1963	0	1
RVBD0820:phoT	7	NonEssential	6	772	-4.3649	0.275778	772	0	2169	0	1
RVBD0821c:phoY2	7	NonEssential	6	119	-6.5021	0.009326	119	0	3652	0	1
RVBD0822c:RVBD0822c	12	NonEssential	5	1687	-4.9651	0.594035	1687	1	187	-1.3266	1
RVBD0823c:RVBD0823c	6	NonEssential	4	2286	-5.7249	0.716781	2286	0	1944	0	1
RVBD0824c:desA1	58	Essential	11	2925	-4.6211	0.987076	2925	0	2783	0	1
RVBD0825c:RVBD0825c	6	NonEssential	3	3221	-5.4769	0.961492	3221	0	1387	0	1
RVBD0826:RVBD0826	12	NonEssential	7	914	-5.3312	0.347858	914	1	286	-1.5642	1
RVBD0827c:kmtR	7	NonEssential	0	3952	-4.6139	1	3952	0	2019	0	1
RVBD0828c:RVBD0828c	5	NonEssential	2	3476	-3.6298	1	3476	0	995	0	1
RVBD0829:RVBD0829	2	NonEssential	2	901	-6.4472	0.197076	901	0	3628	0	1
RVBD0830:RVBD0830	10	NonEssential	6	2374	-4.7734	0.770912	2374	0	1688	0	1
RVBD0831c:RVBD0831c	10	NonEssential	6	1115	-4.8886	0.423764	1115	0	2362	0	1
RVBD0832:PE-PGRS12	5	NonEssential	3	2513	-6.1581	0.754509	2513	0	666	0	1
RVBD0833:PE-PGRS13	5	NonEssential	2	939	-4.8476	0.334242	939	0	1838	0	1
RVBD0834c:PE-PGRS14	9	NonEssential	5	2481	-4.8599	0.80649	2481	0	1081	0	1
RVBD0835:lpqQ	5	NonEssential	4	1940	-3.6815	0.604771	1940	0	1667	0	1
RVBD0836c:RVBD0836c	10	NonEssential	8	574	-6.0951	0.223642	574	0	2160	0	1
RVBD0837c:RVBD0837c	8	NonEssential	6	651	-5.2912	0.233939	651	0	2966	0	1
RVBD0838:lpqR	8	NonEssential	4	3223	-5.3892	0.983251	3223	0	1905	0	1
RVBD0839:RVBD0839	10	NonEssential	6	1310	-5.3563	0.4769	1310	0	627	0	1
RVBD0840c:pip	7	NonEssential	5	1640	-5.5888	0.538656	1640	0	1193	0	1
RVBD0841:RVBD0841	5	NonEssential	4	1427	-6.1024	0.451596	1427	0	1827	0	1
RVBD0842:RVBD0842	9	NonEssential	6	1571	-5.4833	0.533602	1571	0	3798	0	1
RVBD0843:RVBD0843	10	NonEssential	8	737	-5.794	0.274779	737	0	2209	0	1
RVBD0844c:narL	7	NonEssential	3	3480	-5.5696	1	3480	0	1653	0	1
RVBD0845:RVBD0845	8	NonEssential	4	705	-5.4242	0.243716	705	0	1268	0	1
RVBD0846c:RVBD0846c	10	NonEssential	6	2323	-5.0987	0.762082	2323	0	1082	0	1
RVBD0847:lpqS	5	NonEssential	5	246	-5.1531	0.056708	246	0	3983	0	1
RVBD0848:cysK2	7	NonEssential	5	1698	-5.9418	0.560426	1698	0	2228	0	1
RVBD0849:RVBD0849	23	NonEssential	12	2733	-5.5137	0.915131	2733	1	747	-2.0058	1
RVBD0850:RVBD0850	6	NonEssential	3	1395	-5.3658	0.451539	1395	0	3259	0	1
RVBD0851c:RVBD0851c	7	NonEssential	6	1102	-6.0575	0.392199	1102	0	2951	0	1
RVBD0852:fadD16	11	NonEssential	7	1343	-6.2061	0.483242	1343	0	3456	0	1
RVBD0853c:pdc	16	NonEssential	12	551	-6.0896	0.222596	551	0	3933	0	1
RVBD0854:RVBD0854	4	NonEssential	4	758	-6.1655	0.243259	758	0	3726	0	1
RVBD0855:far	13	NonEssential	6	2953	-5.5311	0.951592	2953	0	3682	0	1
RVBD0856:RVBD0856	7	NonEssential	6	877	-6.0089	0.318863	877	0	3719	0	1
RVBD0857:RVBD0857	4	NonEssential	2	2461	-6.5384	0.723958	2461	0	441	0	1
RVBD0858c:dapC	11	NonEssential	8	988	-4.3554	0.363582	988	0	2253	0	1
RVBD0859:fadA	8	NonEssential	6	1404	-5.9065	0.47196	1404	0	1564	0	1
RVBD0860:fadB	24	NonEssential	17	515	-5.8122	0.2161	515	0	2620	0	1
RVBD0861c:ercc3	16	NonEssential	9	1283	-5.5054	0.468866	1283	0	1330	0	1
RVBD0862c:RVBD0862c	19	NonEssential	9	3124	-5.8278	0.999835	3124	0	1794	0	1
RVBD0863:RVBD0863	5	NonEssential	3	2955	-5.5497	0.883012	2955	0	2792	0	1
RVBD0864:moaC2	5	NonEssential	3	2360	-5.2812	0.724939	2360	0	689	0	1
RVBD0865:mog	6	NonEssential	2	3348	-4.562	0.990922	3348	1	332	-2.1419	1
RVBD0866:moaE2	6	NonEssential	4	1812	-4.9299	0.594035	1812	0	1759	0	1
RVBD0867c:rpfA	6	NonEssential	4	2795	-5.8659	0.860781	2795	0	2306	0	1
RVBD0868c:moaD2	5	NonEssential	4	214	-4.5284	0.038953	214	0	568	0	1
RVBD0869c:moaA2	6	NonEssential	4	2091	-4.2593	0.668466	2091	0	3076	0	1
RVBD0870c:RVBD0870c	6	NonEssential	4	1909	-4.7714	0.622591	1909	0	2202	0	1
RVBD0871:cspB	6	NonEssential	3	2592	-5.1713	0.794299	2592	0	2736	0	1
RVBD0872c:PE-PGRS15	6	NonEssential	5	319	-5.4698	0.094952	319	0	1831	0	1
RVBD0873:fadE10	13	NonEssential	11	297	-6.4388	0.11319	297	0	4005	0	1
RVBD0874c:RVBD0874c	6	NonEssential	3	1323	-5.8112	0.434562	1323	0	1562	0	1
RVBD0875c:RVBD0875c	5	NonEssential	2	3075	-5.7852	0.91625	3075	0	445	0	1
RVBD0876c:RVBD0876c	14	Essential	11	169	-6.2121	0.041426	169	0	3178	0	1
RVBD0877:RVBD0877	6	NonEssential	3	3188	-5.0513	0.956292	3188	0	1035	0	1
RVBD0878c:PPE13	16	NonEssential	12	876	-5.881	0.344091	876	1	487	-1.8411	1
RVBD0879c:RVBD0879c	5	Essential	5	329	-6.5035	0.090813	329	0	3953	0	1
RVBD0880:RVBD0880	7	NonEssential	7	315	-6.2063	0.102241	315	0	3956	0	1
RVBD0881:RVBD0881	8	NonEssential	7	449	-6.1973	0.163474	449	0	3380	0	1
RVBD0882:RVBD0882	5	NonEssential	4	611	-6.609	0.197076	611	1	241	-1.8411	1
RVBD0883c:RVBD0883c	66	Essential	32	3341	-5.4242	1	3341	0	3363	0	1
RVBD0884c:serC	85	Essential	9	3976	-4.5354	1	3976	5	124	-1.4366	1
RVBD0885:RVBD0885	14	NonEssential	11	938	-5.7793	0.361213	938	0	4006	0	1
RVBD0886:fprB	8	NonEssential	5	1722	-5.2367	0.565084	1722	0	1542	0	1
RVBD0887c:RVBD0887c	7	NonEssential	3	1130	-4.4475	0.407608	1130	0	1153	0	1
RVBD0888:RVBD0888	20	NonEssential	12	1380	-5.2268	0.501853	1380	0	3637	0	1
RVBD0889c:citA	10	NonEssential	9	285	-6.4966	0.102961	285	0	3877	0	1
RVBD0890c:RVBD0890c	22	NonEssential	11	3305	-5.6651	1	3305	0	1581	0	1
RVBD0891c:RVBD0891c	5	NonEssential	4	536	-4.0658	0.173155	536	0	2728	0	1
RVBD0892:RVBD0892	23	NonEssential	13	2584	-5.6643	0.870652	2584	1	316	-1.3594	1
RVBD0893c:RVBD0893c	8	NonEssential	5	2773	-5.6354	0.874038	2773	0	3291	0	1
RVBD0894:RVBD0894	17	NonEssential	9	2215	-5.4356	0.755996	2215	0	1697	0	1
RVBD0895:RVBD0895	9	NonEssential	4	2810	-4.9651	0.893054	2810	0	2496	0	1
RVBD0896:gltA2	151	Essential	96	144	-5.4355	0.025572	144	1	3241	-2.2924	1
RVBD0897c:RVBD0897c	15	NonEssential	9	2448	-5.1581	0.816187	2448	0	2538	0	1
RVBD0898c:RVBD0898c	4	NonEssential	1	3698	-5.3811	1	3698	0	1314	0	1
RVBD0899:ompA	12	NonEssential	6	3211	-4.7521	0.999334	3211	0	2127	0	1
RVBD0900:RVBD0900	5	NonEssential	3	1575	-4.6891	0.483327	1575	0	2015	0	1
RVBD0901:RVBD0901	5	NonEssential	1	3837	-5.4554	1	3837	0	1731	0	1
RVBD0902c:prrB	116	Essential	66	180	-5.7389	0.042481	180	1	970	-1.3594	1
RVBD0903c:prrA	71	Essential	53	41	-6.1961	7e-05	41	0	3429	0	1
RVBD0904c:accD3	11	NonEssential	8	999	-4.924	0.367709	999	0	3479	0	1
RVBD0905:echA6	9	NonEssential	8	283	-6.1443	0.102751	283	0	3717	0	1
RVBD0906:RVBD0906	8	NonEssential	2	1807	-5.2621	0.597655	1807	0	1531	0	1
RVBD0907:RVBD0907	6	NonEssential	3	3209	-5.5545	0.960458	3209	0	538	0	1
RVBD0908:ctpE	14	NonEssential	10	1156	-5.2843	0.428571	1156	0	1841	0	1
RVBD0909:RVBD0909	6	NonEssential	5	1369	-5.9255	0.444558	1369	0	2813	0	1
RVBD0910:RVBD0910	4	NonEssential	2	3298	-3.6117	0.941267	3298	0	585	0	1
RVBD0911:RVBD0911	9	NonEssential	8	470	-6.0162	0.166012	470	0	3695	0	1
RVBD0912:RVBD0912	7	NonEssential	4	2898	-5.7526	0.893706	2898	0	1866	0	1
RVBD0913c:RVBD0913c	22	NonEssential	13	1854	-5.4813	0.672504	1854	0	3718	0	1
RVBD0914c:RVBD0914c	6	NonEssential	4	2527	-5.7064	0.770912	2527	0	3707	0	1
RVBD0915c:PPE14	7	NonEssential	6	1319	-6.2061	0.458695	1319	0	3217	0	1
RVBD0916c:PE7	5	NonEssential	1	3821	-5.2034	1	3821	1	264	-1.973	1
RVBD0917:betP	30	NonEssential	14	3531	-5.1791	1	3531	0	3129	0	1
RVBD0918:RVBD0918	6	NonEssential	2	3680	-5.6735	1	3680	1	181	-1.4366	1
RVBD0919:RVBD0919	11	NonEssential	6	1916	-4.6473	0.650751	1916	0	2854	0	1
RVBD0920c:RVBD0920c	9	NonEssential	4	2228	-5.1694	0.735712	2228	0	2845	0	1
RVBD0921:RVBD0921	7	NonEssential	3	2003	-5.2637	0.645835	2003	0	2567	0	1
RVBD0922:RVBD0922	7	NonEssential	6	277	-5.7921	0.090813	277	0	3342	0	1
RVBD0923c:RVBD0923c	6	NonEssential	4	2780	-5.5094	0.858877	2780	0	2555	0	1
RVBD0924c:mntH	14	NonEssential	9	956	-6.0737	0.365065	956	0	1367	0	1
RVBD0925c:RVBD0925c	6	NonEssential	6	194	-6.3939	0.040842	194	0	4012	0	1
RVBD0926c:RVBD0926c	7	NonEssential	5	1510	-6.2801	0.504719	1510	0	609	0	1
RVBD0927c:RVBD0927c	8	NonEssential	6	605	-4.9043	0.21977	605	0	2670	0	1
RVBD0928:pstS3	9	NonEssential	6	2455	-3.0943	0.798289	2455	0	2315	0	1
RVBD0929:pstC2	10	NonEssential	5	2533	-4.3588	0.823785	2533	0	1626	0	1
RVBD0930:pstA1	6	NonEssential	4	2097	-5.7576	0.672504	2097	0	2286	0	1
RVBD0931c:pknD	8	NonEssential	6	1195	-5.5497	0.434497	1195	0	2689	0	1
RVBD0932c:pstS2	10	NonEssential	8	603	-6.201	0.227281	603	0	1652	0	1
RVBD0933:pstB	10	NonEssential	7	1410	-4.5915	0.501853	1410	0	2879	0	1
RVBD0934:pstS1	12	NonEssential	7	2430	-6.0898	0.802865	2430	0	1299	0	1
RVBD0935:pstC1	6	NonEssential	3	2503	-4.6073	0.764424	2503	0	462	0	1
RVBD0936:pstA2	10	NonEssential	5	3065	-5.3268	0.961122	3065	0	1287	0	1
RVBD0937c:mku	5	NonEssential	4	1693	-6.488	0.52838	1693	0	960	0	1
RVBD0938:ligD	16	NonEssential	8	1659	-5.3648	0.604153	1659	0	3295	0	1
RVBD0939:RVBD0939	14	NonEssential	8	2202	-5.4725	0.737626	2202	0	1610	0	1
RVBD0940c:RVBD0940c	9	NonEssential	4	2961	-5.1349	0.92878	2961	0	2300	0	1
RVBD0941c:RVBD0941c	8	NonEssential	4	1824	-6.4642	0.601489	1824	0	866	0	1
RVBD0942:RVBD0942	7	NonEssential	5	1736	-5.9374	0.565084	1736	0	3684	0	1
RVBD0943c:RVBD0943c	8	NonEssential	5	2226	-5.4001	0.724854	2226	0	2625	0	1
RVBD0944:RVBD0944	8	NonEssential	4	1867	-4.5146	0.60871	1867	1	517	-2.3597	1
RVBD0945:RVBD0945	6	NonEssential	4	2582	-4.5725	0.793566	2582	0	1761	0	1
RVBD0946c:pgi	152	NonEssential	68	3648	-5.3958	1	3648	4	396	-1.6002	1
RVBD0948c:RVBD0948c	29	Essential	9	3291	-4.994	1	3291	0	2586	0	1
RVBD0949:uvrD1	14	Essential	10	157	-5.6202	0.031284	157	0	2178	0	1
RVBD0950c:RVBD0950c	8	NonEssential	5	826	-6.3601	0.305649	826	0	2137	0	1
RVBD0951:sucC	103	Essential	52	2946	-5.2945	0.990877	2946	0	3988	0	1
RVBD0952:sucD	46	Essential	22	2803	-5.4673	0.952911	2803	1	1702	-2.2931	1
RVBD0953c:RVBD0953c	8	NonEssential	6	1350	-5.5085	0.468249	1350	0	3842	0	1
RVBD0954:RVBD0954	6	NonEssential	5	1718	-6.1907	0.563005	1718	0	1121	0	1
RVBD0955:RVBD0955	9	Essential	9	46	-7.543	7e-05	46	0	4047	0	1
RVBD0956:purN	72	Essential	15	2310	-4.872	0.801613	2310	1	1859	-2.0354	1
RVBD0957:purH	107	Essential	42	3368	-5.0943	1	3368	1	2798	-2.2067	1
RVBD0958:RVBD0958	6	NonEssential	2	2156	-5.2174	0.683683	2156	0	2979	0	1
RVBD0959:RVBD0959	14	NonEssential	7	3202	-5.2898	1	3202	0	939	0	1
RVBD0959A:vapB9	7	NonEssential	4	2821	-5.631	0.870652	2821	0	3072	0	1
RVBD0960:RVBD0960	2	NonEssential	1	3427	-4.1573	0.915918	3427	0	2037	0	1
RVBD0961:RVBD0961	8	NonEssential	3	1691	-4.5615	0.561377	1691	0	1836	0	1
RVBD0962c:lprP	6	NonEssential	4	1810	-4.8078	0.594035	1810	0	641	0	1
RVBD0963c:RVBD0963c	6	NonEssential	3	2116	-5.9883	0.673994	2116	0	1926	0	1
RVBD0964c:RVBD0964c	6	NonEssential	3	3165	-4.6092	0.946357	3165	0	539	0	1
RVBD0965c:RVBD0965c	6	NonEssential	5	972	-6.4123	0.336939	972	0	2901	0	1
RVBD0966c:RVBD0966c	8	NonEssential	6	2049	-5.6335	0.677558	2049	0	3520	0	1
RVBD0967:csoR	5	NonEssential	4	1697	-5.911	0.531595	1697	0	3337	0	1
RVBD0968:RVBD0968	5	NonEssential	2	3646	-5.4566	1	3646	0	3074	0	1
RVBD0969:ctpV	13	NonEssential	7	2385	-5.2401	0.786317	2385	0	1953	0	1
RVBD0970:RVBD0970	10	NonEssential	7	1137	-5.4542	0.436683	1137	0	2404	0	1
RVBD0971c:echA7	6	NonEssential	2	3692	-4.9377	1	3692	0	2045	0	1
RVBD0972c:fadE12	7	NonEssential	4	2211	-6.1443	0.71303	2211	0	2682	0	1
RVBD0973c:accA2	13	NonEssential	7	1925	-5.5311	0.660519	1925	0	3594	0	1
RVBD0974c:accD2	11	NonEssential	6	2579	-5.5572	0.851708	2579	0	2667	0	1
RVBD0975c:fadE13	7	NonEssential	4	2817	-5.0631	0.870652	2817	0	2840	0	1
RVBD0976c:RVBD0976c	15	NonEssential	7	2024	-5.0628	0.6948	2024	1	120	7.2934	0.954909
RVBD0977:PE-PGRS16	19	NonEssential	15	400	-5.7558	0.167	400	1	868	-2.2931	1
RVBD0979A:rpmF	17	NonEssential	7	3525	-4.9424	1	3525	0	2403	0	1
RVBD0979c:RVBD0979c	6	Essential	1	3815	-4.8801	1	3815	0	566	0	1
RVBD0980c:PE-PGRS18	5	NonEssential	5	431	-6.0834	0.137771	431	0	3896	0	1
RVBD0981:mprA	10	NonEssential	9	296	-5.9925	0.106229	296	0	3924	0	1
RVBD0982:mprB	141	Essential	87	313	-5.6511	0.116469	313	1	3147	-2.1773	1
RVBD0983:pepD	8	NonEssential	5	1499	-5.2268	0.500099	1499	0	2789	0	1
RVBD0984:moaB2	5	NonEssential	2	3570	-4.1628	1	3570	0	884	0	1
RVBD0985c:mscL	7	NonEssential	5	870	-5.2472	0.308571	870	0	3453	0	1
RVBD0986:RVBD0986	14	NonEssential	11	361	-5.2815	0.147046	361	0	3943	0	1
RVBD0987:RVBD0987	24	NonEssential	15	1396	-5.646	0.514206	1396	1	502	0.83937	1
RVBD0988:RVBD0988	13	NonEssential	10	174	-6.3213	0.040247	174	0	3546	0	1
RVBD0989c:grcC2	6	NonEssential	6	396	-5.1648	0.132031	396	0	3910	0	1
RVBD0990c:RVBD0990c	7	NonEssential	2	3206	-5.2193	0.981302	3206	0	695	0	1
RVBD0991c:RVBD0991c	9	NonEssential	7	615	-5.8349	0.225594	615	0	1885	0	1
RVBD0992c:RVBD0992c	6	NonEssential	1	3694	-4.9613	1	3694	0	1484	0	1
RVBD0993:galU	116	Essential	62	780	-5.2294	0.312934	780	1	2073	-1.8411	1
RVBD0994:moeA1	9	NonEssential	9	161	-6.3783	0.028811	161	0	4027	0	1
RVBD0995:rimJ	8	NonEssential	6	766	-5.4381	0.276994	766	0	3690	0	1
RVBD0996:RVBD0996	7	NonEssential	6	1019	-4.0446	0.361944	1019	0	3124	0	1
RVBD0997:RVBD0997	5	NonEssential	2	3149	-3.408	0.938584	3149	0	2353	0	1
RVBD0998:RVBD0998	9	NonEssential	7	1023	-3.9205	0.369572	1023	0	1909	0	1
RVBD0999:RVBD0999	8	NonEssential	6	434	-5.0921	0.158963	434	0	2297	0	1
RVBD1000c:RVBD1000c	5	NonEssential	3	3068	-5.7491	0.914212	3068	0	3064	0	1
RVBD1001:arcA	7	NonEssential	6	878	-6.619	0.318863	878	0	3376	0	1
RVBD1002c:RVBD1002c	192	NonEssential	123	103	-5.7539	0.005665	103	1	3221	-2.0058	1
RVBD1003:RVBD1003	6	Essential	2	3700	-5.5619	1	3700	2	98	-1.8515	0.583434
RVBD1004c:RVBD1004c	7	NonEssential	5	1145	-6.1723	0.418255	1145	0	3117	0	1
RVBD1005c:pabB	114	Essential	31	2515	-4.7332	0.860781	2515	5	208	-1.9429	1
RVBD1006:RVBD1006	16	NonEssential	14	65	-6.9697	7e-05	65	0	4000	0	1
RVBD1007c:metS	160	Essential	23	3888	-4.425	1	3888	9	117	-1.7119	1
RVBD1008:tatD	6	NonEssential	2	2401	-4.9424	0.743104	2401	0	496	0	1
RVBD1009:rpfB	6	NonEssential	4	360	-6.1942	0.11319	360	0	2806	0	1
RVBD1010:ksgA	9	NonEssential	2	3400	-4.6704	1	3400	0	789	0	1
RVBD1011:ispE	92	Essential	51	1827	-5.3592	0.661969	1827	0	2975	0	1
RVBD1012:RVBD1012	3	NonEssential	2	1178	-5.5074	0.344535	1178	0	2640	0	1
RVBD1013:pks16	20	NonEssential	18	101	-6.0466	0.004222	101	0	3976	0	1
RVBD1014c:pth	37	Essential	22	850	-5.8438	0.358726	850	0	2453	0	1
RVBD1015c:rplY	49	Essential	28	1447	-5.5039	0.541884	1447	0	2083	0	1
RVBD1016c:lpqT	13	NonEssential	8	2588	-5.4836	0.858114	2588	0	1361	0	1
RVBD1017c:prsA	101	Essential	47	2291	-5.4372	0.792787	2291	3	457	-1.9031	1
RVBD1018c:glmU	87	Essential	55	291	-5.7508	0.113402	291	1	2177	-2.0467	1
RVBD1019:RVBD1019	5	NonEssential	2	3180	-5.2251	0.945527	3180	0	1157	0	1
RVBD1020:mfd	23	NonEssential	15	1285	-5.6615	0.472755	1285	0	1733	0	1
RVBD1021:RVBD1021	6	NonEssential	6	317	-6.2583	0.094602	317	0	3861	0	1
RVBD1022:lpqU	7	NonEssential	6	1199	-5.8011	0.42665	1199	0	3583	0	1
RVBD1023:eno	84	Essential	22	2397	-4.5763	0.824912	2397	3	432	-1.7817	1
RVBD1024:RVBD1024	41	Essential	15	1884	-5.0428	0.671389	1884	3	239	-2.254	1
RVBD1025:RVBD1025	42	Essential	22	2922	-5.0299	0.980409	2922	0	3469	0	1
RVBD1026:RVBD1026	6	NonEssential	5	271	-5.5631	0.079974	271	0	3457	0	1
RVBD1027c:kdpE	9	NonEssential	7	325	-5.1809	0.119925	325	0	1974	0	1
RVBD1028A:kdpF	6	NonEssential	5	1475	-5.789	0.472914	1475	0	912	0	1
RVBD1028c:kdpD	16	NonEssential	14	267	-5.5499	0.100579	267	0	4026	0	1
RVBD1029:kdpA	25	NonEssential	13	1522	-5.4084	0.557687	1522	0	3515	0	1
RVBD1030:kdpB	11	NonEssential	7	703	-5.3514	0.262486	703	0	2683	0	1
RVBD1031:kdpC	6	NonEssential	3	2570	-5.5217	0.789483	2570	0	2775	0	1
RVBD1032c:trcS	6	NonEssential	5	837	-6.2787	0.301251	837	0	2965	0	1
RVBD1033c:trcR	14	NonEssential	12	284	-5.4131	0.106229	284	0	2376	0	1
RVBD1034c:RVBD1034c	5	NonEssential	2	1346	-5.5538	0.434497	1346	0	1755	0	1
RVBD1035c:RVBD1035c	5	NonEssential	4	1262	-6.1214	0.41119	1262	0	2953	0	1
RVBD1036c:RVBD1036c	6	NonEssential	4	1858	-6.193	0.607244	1858	0	1565	0	1
RVBD1037c:esxI	5	NonEssential	3	995	-5.8541	0.350177	995	0	805	0	1
RVBD1038c:esxJ	3	NonEssential	2	2863	-5.7373	0.801904	2863	0	1053	0	1
RVBD1039c:PPE15	6	NonEssential	4	738	-5.0343	0.25894	738	0	3452	0	1
RVBD1040c:PE8	6	NonEssential	5	462	-5.9688	0.155157	462	0	3663	0	1
RVBD1041c:RVBD1041c	9	NonEssential	8	644	-5.9734	0.23825	644	0	3585	0	1
RVBD1042c:RVBD1042c	4	NonEssential	3	2598	-5.8838	0.76961	2598	0	3202	0	1
RVBD1043c:RVBD1043c	13	NonEssential	7	2805	-5.6884	0.915918	2805	1	590	-2.142	1
RVBD1044:RVBD1044	38	NonEssential	17	3321	-5.5145	1	3321	1	1098	-2.0058	1
RVBD1045:RVBD1045	7	NonEssential	4	1471	-5.3398	0.492661	1471	0	3319	0	1
RVBD1046c:RVBD1046c	9	NonEssential	5	2514	-5.7498	0.818053	2514	0	1103	0	1
RVBD1047:RVBD1047	19	NonEssential	19	33	-4.1955	7e-05	33	0	4051	0	1
RVBD1048c:RVBD1048c	5	NonEssential	4	1709	-5.6925	0.533602	1709	0	3411	0	1
RVBD1049:RVBD1049	2	NonEssential	0	3800	-4.9614	1	3800	1	163	-1.8411	1
RVBD1050:RVBD1050	8	NonEssential	8	270	-5.8158	0.092875	270	0	3974	0	1
RVBD1051c:RVBD1051c	6	NonEssential	4	1857	-4.853	0.607244	1857	0	962	0	1
RVBD1052:RVBD1052	7	NonEssential	6	553	-6.0898	0.202307	553	0	1416	0	1
RVBD1053c:RVBD1053c	5	NonEssential	1	3339	-5.1315	0.980409	3339	1	132	-1.3004	0.746756
RVBD1054:RVBD1054	5	NonEssential	2	3635	-5.4084	1	3635	0	2220	0	1
RVBD1055:RVBD1055	2	NonEssential	2	2307	-5.9874	0.629226	2307	0	2474	0	1
RVBD1056:RVBD1056	6	NonEssential	2	2382	-5.3312	0.739911	2382	0	498	0	1
RVBD1057:RVBD1057	5	NonEssential	5	484	-6.6716	0.152927	484	0	3857	0	1
RVBD1058:fadD14	13	NonEssential	9	1521	-5.6658	0.543712	1521	0	3388	0	1
RVBD1059:RVBD1059	8	NonEssential	6	1037	-5.7815	0.389892	1037	0	3391	0	1
RVBD1060:RVBD1060	8	NonEssential	5	2619	-4.3066	0.830419	2619	0	595	0	1
RVBD1061:RVBD1061	6	NonEssential	3	2933	-5.421	0.90061	2933	0	931	0	1
RVBD1062:RVBD1062	6	NonEssential	5	1074	-5.7047	0.374249	1074	0	2943	0	1
RVBD1063c:RVBD1063c	6	NonEssential	4	2722	-5.654	0.841215	2722	0	3610	0	1
RVBD1064c:lpqV	4	NonEssential	0	3881	-4.1717	1	3881	0	992	0	1
RVBD1065:RVBD1065	7	NonEssential	4	2087	-5.217	0.672504	2087	0	2961	0	1
RVBD1066:RVBD1066	5	NonEssential	3	2782	-5.9374	0.833435	2782	0	1392	0	1
RVBD1067c:PE-PGRS19	6	NonEssential	2	3551	-4.7739	1	3551	0	1536	0	1
RVBD1068c:PE-PGRS20	5	NonEssential	3	2250	-5.2987	0.709222	2250	0	2374	0	1
RVBD1069c:RVBD1069c	11	NonEssential	5	3038	-5.4722	0.964964	3038	0	2969	0	1
RVBD1070c:echA8	8	NonEssential	7	693	-6.071	0.240271	693	0	3920	0	1
RVBD1071c:echA9	9	NonEssential	5	2943	-5.3678	0.921878	2943	0	1994	0	1
RVBD1072:RVBD1072	14	NonEssential	6	3462	-5.1265	1	3462	0	1218	0	1
RVBD1073:RVBD1073	8	NonEssential	6	848	-4.2081	0.312934	848	0	2666	0	1
RVBD1074c:fadA3	9	NonEssential	5	1994	-5.5841	0.657677	1994	0	1938	0	1
RVBD1075c:RVBD1075c	6	NonEssential	2	3458	-4.872	1	3458	0	460	0	1
RVBD1076:lipU	10	NonEssential	6	843	-5.0604	0.313103	843	0	3279	0	1
RVBD1077:cbs	6	NonEssential	3	1762	-4.7756	0.579497	1762	0	619	0	1
RVBD1078:pra	7	NonEssential	5	384	-5.8617	0.13209	384	0	1435	0	1
RVBD1079:metB	6	NonEssential	5	646	-5.24	0.227777	646	0	2637	0	1
RVBD1080c:greA	5	NonEssential	4	1418	-5.4091	0.449853	1418	0	3240	0	1
RVBD1081c:RVBD1081c	6	NonEssential	4	2713	-5.2563	0.839024	2713	0	2049	0	1
RVBD1082:mca	7	NonEssential	3	3475	-3.9551	1	3475	0	1415	0	1
RVBD1083:RVBD1083	6	NonEssential	3	3455	-5.3254	1	3455	0	1810	0	1
RVBD1084:RVBD1084	18	NonEssential	10	2631	-4.8715	0.882969	2631	0	2919	0	1
RVBD1085c:RVBD1085c	10	NonEssential	6	827	-5.3451	0.307873	827	0	3724	0	1
RVBD1086:RVBD1086	6	NonEssential	5	392	-6.2933	0.129574	392	0	3260	0	1
RVBD1087:PE-PGRS21	6	NonEssential	5	1045	-6.2301	0.361944	1045	0	3343	0	1
RVBD1087A:RVBD1087A	6	NonEssential	2	2188	-4.8576	0.6927	2188	0	1215	0	1
RVBD1088:PE9	4	NonEssential	4	639	-5.2424	0.18904	639	0	3799	0	1
RVBD1089:PE10	2	NonEssential	2	1365	-6.759	0.359187	1365	0	3300	0	1
RVBD1089A:celA2a	2	NonEssential	0	3731	-5.2687	1	3731	0	361	0	1
RVBD1090:celA2b	5	NonEssential	4	1830	-6.3539	0.572951	1830	0	3422	0	1
RVBD1091:PE-PGRS22	5	NonEssential	2	3580	-4.567	1	3580	0	1067	0	1
RVBD1092c:coaA	86	Essential	51	853	-5.5141	0.347858	853	0	4017	0	1
RVBD1093:glyA1	119	Essential	49	3703	-5.2678	1	3703	1	1284	-1.561	1
RVBD1094:desA2	68	Essential	22	2035	-5.09	0.72372	2035	2	718	-1.736	1
RVBD1095:phoH2	9	NonEssential	4	819	-5.4856	0.3155	819	0	2044	0	1
RVBD1096:RVBD1096	15	NonEssential	10	1608	-5.6755	0.585527	1608	1	127	6.3919	1
RVBD1097c:RVBD1097c	10	NonEssential	7	797	-5.2472	0.301251	797	0	1267	0	1
RVBD1098c:fum	131	Essential	77	202	-5.6582	0.056223	202	2	285	-1.3254	1
RVBD1099c:glpX	11	Essential	9	594	-6.0162	0.223642	594	0	3942	0	1
RVBD1100:RVBD1100	7	NonEssential	5	864	-6.3649	0.307873	864	0	1438	0	1
RVBD1101c:RVBD1101c	15	NonEssential	8	1845	-5.2128	0.651767	1845	0	2811	0	1
RVBD1102c:mazF3	6	NonEssential	2	3431	-5.3295	1	3431	0	559	0	1
RVBD1103c:mazE3	7	NonEssential	5	1433	-5.6007	0.486135	1433	0	3308	0	1
RVBD1104:RVBD1104	6	NonEssential	4	1964	-4.4492	0.637545	1964	0	1833	0	1
RVBD1105:RVBD1105	6	NonEssential	4	2494	-6.0652	0.762082	2494	0	1094	0	1
RVBD1106c:RVBD1106c	9	NonEssential	5	2017	-5.217	0.663502	2017	0	2731	0	1
RVBD1107c:xseB	4	NonEssential	2	2221	-4.9548	0.660434	2221	0	1378	0	1
RVBD1108c:xseA	9	NonEssential	8	336	-5.4619	0.124822	336	0	3919	0	1
RVBD1109c:RVBD1109c	6	NonEssential	4	1731	-4.5899	0.565084	1731	0	1945	0	1
RVBD1110:lytB2	101	Essential	22	3632	-5.1937	1	3632	25	6	-1.8411	0.000198
RVBD1111c:RVBD1111c	108	Essential	46	1635	-5.1	0.594012	1635	2	229	2.8634	1
RVBD1112:RVBD1112	6	NonEssential	1	2182	-4.9743	0.690641	2182	0	2321	0	1
RVBD1113:vapB32	3	NonEssential	3	239	-4.5427	0.040195	239	0	3989	0	1
RVBD1114:vapC32	7	NonEssential	6	450	-7.1508	0.163474	450	0	3614	0	1
RVBD1115:RVBD1115	6	NonEssential	4	1301	-5.9185	0.430392	1301	0	2463	0	1
RVBD1116:RVBD1116	2	NonEssential	1	2842	-5.2526	0.747334	2842	0	576	0	1
RVBD1116A:RVBD1116A	5	NonEssential	3	1114	-5.2251	0.374177	1114	0	1774	0	1
RVBD1117:RVBD1117	5	NonEssential	4	1793	-5.1154	0.561006	1793	0	2802	0	1
RVBD1118c:RVBD1118c	7	NonEssential	5	1886	-6.0093	0.607244	1886	0	2598	0	1
RVBD1119c:RVBD1119c	3	NonEssential	0	3781	-5.3571	1	3781	0	1689	0	1
RVBD1120c:RVBD1120c	6	NonEssential	3	2710	-5.6297	0.839024	2710	0	1358	0	1
RVBD1121:zwf1	14	NonEssential	9	1712	-5.7412	0.612669	1712	0	2945	0	1
RVBD1122:gnd2	76	Essential	45	905	-5.6418	0.361944	905	0	3156	0	1
RVBD1123c:bpoB	12	NonEssential	8	855	-5.5543	0.332449	855	0	3056	0	1
RVBD1124:ephC	9	NonEssential	4	2995	-5.4857	0.937172	2995	0	2705	0	1
RVBD1125:RVBD1125	6	NonEssential	3	2666	-5.4035	0.821453	2666	0	964	0	1
RVBD1126c:RVBD1126c	6	NonEssential	6	731	-5.8019	0.256038	731	0	3747	0	1
RVBD1127c:ppdK	8	NonEssential	1	3923	-4.0203	1	3923	0	1493	0	1
RVBD1128c:RVBD1128c	7	NonEssential	3	1320	-5.6159	0.458809	1320	0	2172	0	1
RVBD1129c:RVBD1129c	16	NonEssential	10	2090	-4.8524	0.715135	2090	0	1309	0	1
RVBD1130:prpD	12	NonEssential	6	3153	-5.2171	0.989048	3153	0	1042	0	1
RVBD1131:prpC	7	NonEssential	6	528	-6.236	0.195655	528	0	3448	0	1
RVBD1132:RVBD1132	25	NonEssential	14	2797	-5.5545	0.931305	2797	0	3765	0	1
RVBD1133c:metE	204	Essential	68	3536	-5.0708	1	3536	5	160	-1.3266	1
RVBD1134:RVBD1134	2	NonEssential	0	3608	-5.6	0.990877	3608	0	271	0	1
RVBD1135A:RVBD1135A	4	NonEssential	2	1326	-5.6853	0.423985	1326	0	597	0	1
RVBD1135c:PPE16	16	NonEssential	14	203	-5.9888	0.059614	203	0	3351	0	1
RVBD1137c:RVBD1137c	7	NonEssential	6	1110	-5.7287	0.395668	1110	0	1828	0	1
RVBD1138c:RVBD1138c	6	NonEssential	6	459	-5.9789	0.155157	459	0	3886	0	1
RVBD1139c:RVBD1139c	8	NonEssential	6	1335	-6.2738	0.460507	1335	0	3476	0	1
RVBD1140:RVBD1140	7	NonEssential	3	1490	-5.6086	0.500099	1490	0	2410	0	1
RVBD1141c:echA11	7	NonEssential	4	2502	-5.9916	0.794745	2502	0	3078	0	1
RVBD1142c:echA10	7	NonEssential	4	2309	-4.9281	0.742955	2309	0	1470	0	1
RVBD1143:mcr	7	NonEssential	4	1444	-5.1744	0.486588	1444	0	1852	0	1
RVBD1144:RVBD1144	6	NonEssential	4	1816	-4.9796	0.594035	1816	0	3256	0	1
RVBD1144Ac:RVBD1144Ac	5	NonEssential	5	777	-5.789	0.261571	777	0	3715	0	1
RVBD1145:mmpL13a	7	NonEssential	3	1638	-4.4891	0.533602	1638	0	2344	0	1
RVBD1146:mmpL13b	9	NonEssential	8	395	-6.6545	0.148673	395	0	1149	0	1
RVBD1147:RVBD1147	7	NonEssential	4	2808	-4.3667	0.870102	2808	0	1380	0	1
RVBD1148c:RVBD1148c	11	NonEssential	9	281	-4.8232	0.105548	281	0	3518	0	1
RVBD1151c:RVBD1151c	6	NonEssential	5	1776	-5.2852	0.581791	1776	0	2745	0	1
RVBD1152:RVBD1152	5	NonEssential	3	1523	-5.7373	0.47196	1523	0	2087	0	1
RVBD1153c:omt	7	NonEssential	3	3588	-5.6	1	3588	0	3334	0	1
RVBD1154c:RVBD1154c	8	NonEssential	6	1479	-5.7486	0.492944	1479	0	3524	0	1
RVBD1155:RVBD1155	7	NonEssential	3	2829	-4.8078	0.872571	2829	0	1546	0	1
RVBD1156:RVBD1156	7	NonEssential	3	2055	-5.5063	0.660131	2055	0	981	0	1
RVBD1157c:RVBD1157c	6	NonEssential	5	1146	-5.3263	0.399939	1146	0	3660	0	1
RVBD1158c:RVBD1158c	7	NonEssential	4	2545	-6.1843	0.810625	2545	0	1087	0	1
RVBD1159:pimE	13	NonEssential	13	34	-7.1794	7e-05	34	0	4050	0	1
RVBD1159A:RVBD1159A	4	NonEssential	1	3114	-5.3787	0.899628	3114	0	2487	0	1
RVBD1160:mutT2	6	NonEssential	1	3687	-5.0556	1	3687	0	2021	0	1
RVBD1161:narG	29	NonEssential	18	1893	-5.6643	0.688989	1893	0	3915	0	1
RVBD1162:narH	8	NonEssential	6	1385	-5.3592	0.46987	1385	0	1835	0	1
RVBD1163:narJ	5	NonEssential	1	3363	-5.2843	0.985966	3363	0	1093	0	1
RVBD1164:narI	6	NonEssential	5	1486	-5.3801	0.474428	1486	0	2955	0	1
RVBD1165:typA	15	NonEssential	8	2002	-5.1937	0.69149	2002	0	3120	0	1
RVBD1166:lpqW	160	Essential	120	6	-6.5784	7e-05	6	4	130	1.0903	1
RVBD1167c:RVBD1167c	6	NonEssential	3	1260	-4.7917	0.423985	1260	0	1677	0	1
RVBD1168c:PPE17	6	NonEssential	2	1719	-5.0407	0.563501	1719	1	260	-1.8411	1
RVBD1169c:lipX	5	NonEssential	4	187	-5.3911	0.029673	187	0	3220	0	1
RVBD1170:mshB	8	NonEssential	5	1382	-5.1686	0.468866	1382	0	3157	0	1
RVBD1171:RVBD1171	7	NonEssential	4	2459	-5.0628	0.786491	2459	0	2513	0	1
RVBD1172c:PE12	9	NonEssential	7	751	-4.9424	0.281236	751	0	3168	0	1
RVBD1173:fbiC	15	NonEssential	7	2896	-4.4251	0.945527	2896	0	2206	0	1
RVBD1174c:TB8.4	6	NonEssential	0	3969	-4.9402	1	3969	0	1856	0	1
RVBD1175c:fadH	15	NonEssential	8	2379	-4.6378	0.787882	2379	1	72	9.9068	0.464521
RVBD1176c:RVBD1176c	7	NonEssential	3	3555	-5.175	1	3555	0	1888	0	1
RVBD1177:fdxC	21	Essential	6	3678	-4.2635	1	3678	0	1328	0	1
RVBD1178:RVBD1178	8	NonEssential	5	2366	-5.2458	0.756767	2366	0	2156	0	1
RVBD1179c:RVBD1179c	22	NonEssential	12	1895	-5.2414	0.681238	1895	0	1383	0	1
RVBD1181:pks4	39	NonEssential	21	1222	-5.6591	0.468866	1222	0	2345	0	1
RVBD1182:papA3	12	NonEssential	5	3340	-5.1985	1	3340	0	2486	0	1
RVBD1183:mmpL10	30	NonEssential	23	171	-5.5003	0.04236	171	0	3691	0	1
RVBD1184c:RVBD1184c	14	NonEssential	3	3565	-5.1307	1	3565	0	2676	0	1
RVBD1185c:fadD21	21	NonEssential	10	2154	-5.3742	0.749915	2154	0	3673	0	1
RVBD1186c:RVBD1186c	10	NonEssential	6	2806	-4.9958	0.90233	2806	0	3551	0	1
RVBD1187:rocA	10	NonEssential	6	1175	-5.6735	0.443836	1175	0	1889	0	1
RVBD1188:RVBD1188	11	NonEssential	6	1792	-4.1359	0.615741	1792	0	1814	0	1
RVBD1189:sigI	6	NonEssential	3	1933	-5.4637	0.628923	1933	0	634	0	1
RVBD1190:RVBD1190	8	NonEssential	6	1198	-4.7181	0.434497	1198	0	2475	0	1
RVBD1191:RVBD1191	8	NonEssential	5	1801	-5.277	0.594035	1801	0	2699	0	1
RVBD1192:RVBD1192	7	NonEssential	3	3430	-4.9264	1	3430	0	2288	0	1
RVBD1193:fadD36	6	NonEssential	4	2398	-5.8774	0.743104	2398	0	2763	0	1
RVBD1194c:RVBD1194c	11	NonEssential	7	191	-5.7479	0.04948	191	1	255	-1.561	1
RVBD1195:PE13	4	NonEssential	1	3381	-4.079	0.971558	3381	0	1592	0	1
RVBD1196:PPE18	11	NonEssential	9	742	-6.018	0.276763	742	0	3379	0	1
RVBD1197:esxK	4	NonEssential	2	3224	-2.9326	0.921001	3224	0	452	0	1
RVBD1198:esxL	2	NonEssential	2	1562	-6.5544	0.423985	1562	0	3145	0	1
RVBD1199c:RVBD1199c	2	NonEssential	2	1325	-3.5708	0.352238	1325	0	3325	0	1
RVBD1200:RVBD1200	18	NonEssential	12	1513	-5.7881	0.565084	1513	0	2732	0	1
RVBD1201c:dapD	71	Essential	49	159	-5.7043	0.035684	159	0	4036	0	1
RVBD1202:dapE	105	Essential	83	26	-6.0005	7e-05	26	0	3230	0	1
RVBD1203c:RVBD1203c	5	NonEssential	1	3352	-4.4023	0.984406	3352	0	1147	0	1
RVBD1204c:RVBD1204c	7	NonEssential	3	3616	-5.6085	1	3616	0	2609	0	1
RVBD1205:RVBD1205	8	NonEssential	6	702	-5.6814	0.243301	702	0	3578	0	1
RVBD1206:fadD6	16	NonEssential	9	2405	-5.4269	0.802401	2405	0	3427	0	1
RVBD1207:folP2	8	NonEssential	6	1034	-6.3032	0.378281	1034	0	3761	0	1
RVBD1208:gpgS	83	Essential	43	2425	-5.2325	0.830758	2425	0	3312	0	1
RVBD1209:RVBD1209	5	NonEssential	4	1666	-6.4977	0.526768	1666	0	2906	0	1
RVBD1210:tagA	10	NonEssential	6	2155	-5.4345	0.724154	2155	0	2936	0	1
RVBD1211:RVBD1211	4	Essential	3	1101	-4.7883	0.352724	1101	0	1556	0	1
RVBD1212c:glgA	5	NonEssential	3	753	-4.7129	0.253977	753	0	3349	0	1
RVBD1213:glgC	8	NonEssential	7	804	-5.9211	0.297717	804	0	3840	0	1
RVBD1214c:PE14	5	NonEssential	4	1394	-5.2934	0.440575	1394	0	813	0	1
RVBD1215c:RVBD1215c	16	NonEssential	10	991	-5.9	0.374992	991	0	1633	0	1
RVBD1216c:RVBD1216c	8	NonEssential	6	957	-4.1964	0.350177	957	0	2211	0	1
RVBD1217c:RVBD1217c	10	NonEssential	5	3154	-4.5504	0.98203	3154	1	387	-1.9429	1
RVBD1218c:RVBD1218c	4	NonEssential	3	1481	-6.3865	0.47128	1481	0	3034	0	1
RVBD1219c:RVBD1219c	9	NonEssential	9	237	-4.8121	0.081943	237	0	3991	0	1
RVBD1220c:RVBD1220c	6	NonEssential	4	263	-6.6645	0.07335	263	0	3540	0	1
RVBD1221:sigE	5	NonEssential	1	2714	-5.0628	0.816187	2714	0	2550	0	1
RVBD1222:rseA	6	Essential	0	3935	-5.2034	1	3935	0	915	0	1
RVBD1223:htrA	92	Essential	39	3515	-5.2429	1	3515	1	2428	-2.142	1
RVBD1224:tatB	36	Essential	25	684	-6.0005	0.284859	684	1	817	-1.7817	1
RVBD1225c:RVBD1225c	6	NonEssential	2	2899	-5.3958	0.895926	2899	0	620	0	1
RVBD1226c:RVBD1226c	6	NonEssential	5	1274	-6.3582	0.423985	1274	0	2526	0	1
RVBD1227c:RVBD1227c	6	NonEssential	4	1515	-4.6192	0.480586	1515	0	961	0	1
RVBD1228:lpqX	8	NonEssential	8	190	-5.1955	0.042481	190	0	4014	0	1
RVBD1229c:mrp	103	Essential	49	2329	-5.2715	0.800893	2329	1	3049	-2.3597	1
RVBD1230c:RVBD1230c	10	NonEssential	7	265	-5.7874	0.09435	265	0	958	0	1
RVBD1231c:RVBD1231c	6	NonEssential	2	3432	-4.9061	1	3432	0	2462	0	1
RVBD1232c:RVBD1232c	6	NonEssential	4	1241	-5.6676	0.423095	1241	0	2340	0	1
RVBD1233c:RVBD1233c	8	NonEssential	5	2847	-4.7466	0.897157	2847	0	1158	0	1
RVBD1234:RVBD1234	5	NonEssential	1	3701	-5.0311	1	3701	0	2039	0	1
RVBD1235:lpqY	6	NonEssential	6	435	-6.0361	0.148552	435	0	3895	0	1
RVBD1236:sugA	5	NonEssential	5	346	-6.1949	0.09435	346	0	3946	0	1
RVBD1237:sugB	8	NonEssential	2	3532	-5.1573	1	3532	1	93	6.9371	0.611799
RVBD1238:sugC	15	NonEssential	11	726	-5.8714	0.276994	726	0	3633	0	1
RVBD1239c:corA	7	NonEssential	2	3676	-4.6704	1	3676	0	1504	0	1
RVBD1240:mdh	10	Essential	6	1018	-5.0648	0.369572	1018	0	3100	0	1
RVBD1241:RVBD1241	4	NonEssential	3	2330	-3.7663	0.685637	2330	0	2658	0	1
RVBD1242:RVBD1242	5	NonEssential	2	3382	-4.9348	0.987335	3382	0	1756	0	1
RVBD1243c:PE-PGRS23	6	NonEssential	4	844	-5.468	0.305477	844	0	1854	0	1
RVBD1244:lpqZ	7	NonEssential	6	924	-6.2838	0.329244	924	0	3242	0	1
RVBD1245c:RVBD1245c	7	NonEssential	5	925	-4.6599	0.329244	925	0	2233	0	1
RVBD1246c:RVBD1246c	3	NonEssential	1	3478	-4.425	0.969436	3478	0	1104	0	1
RVBD1247c:RVBD1247c	2	NonEssential	0	3820	-4.6573	1	3820	0	908	0	1
RVBD1248c:RVBD1248c	30	NonEssential	10	3378	-4.7732	1	3378	0	1576	0	1
RVBD1249c:RVBD1249c	5	NonEssential	2	2825	-4.7756	0.842586	2825	0	1580	0	1
RVBD1250:RVBD1250	20	NonEssential	8	3469	-5.3715	1	3469	1	322	-1.4366	1
RVBD1251c:RVBD1251c	29	NonEssential	12	2175	-5.313	0.771289	2175	0	3284	0	1
RVBD1252c:lprE	6	NonEssential	0	3922	-5.0083	1	3922	0	1441	0	1
RVBD1253:deaD	16	NonEssential	9	839	-4.7564	0.334183	839	0	920	0	1
RVBD1254:RVBD1254	176	Essential	120	49	-5.8536	7e-05	49	2	2033	-1.9235	1
RVBD1255c:RVBD1255c	7	NonEssential	5	1289	-6.1142	0.448557	1289	0	2747	0	1
RVBD1256c:cyp130	6	NonEssential	3	3412	-4.3111	1	3412	0	699	0	1
RVBD1257c:RVBD1257c	9	NonEssential	5	1500	-5.7491	0.521691	1500	0	1803	0	1
RVBD1258c:RVBD1258c	11	NonEssential	6	2691	-5.2393	0.879274	2691	0	1502	0	1
RVBD1259:udgB	8	NonEssential	5	1184	-6.747	0.434497	1184	2	108	-1.9744	0.664999
RVBD1260:RVBD1260	13	NonEssential	5	3186	-5.5668	0.999334	3186	0	1069	0	1
RVBD1261c:RVBD1261c	6	NonEssential	3	2556	-5.3786	0.783435	2556	0	2051	0	1
RVBD1262c:RVBD1262c	6	NonEssential	5	1017	-5.3211	0.35871	1017	0	1946	0	1
RVBD1263:amiB2	10	NonEssential	6	2135	-5.6308	0.715135	2135	0	3352	0	1
RVBD1264:RVBD1264	7	NonEssential	3	3139	-4.853	0.964964	3139	0	2631	0	1
RVBD1265:RVBD1265	6	NonEssential	4	2652	-5.863	0.811341	2652	0	3045	0	1
RVBD1266c:pknH	14	NonEssential	9	2338	-5.6643	0.775127	2338	0	1395	0	1
RVBD1267c:embR	8	NonEssential	2	3594	-5.2356	1	3594	1	495	-2.3169	1
RVBD1268c:RVBD1268c	6	NonEssential	4	1113	-5.8472	0.38391	1113	0	975	0	1
RVBD1269c:RVBD1269c	4	NonEssential	1	3573	-4.9509	1	3573	0	1932	0	1
RVBD1270c:lprA	6	NonEssential	4	2388	-5.9185	0.741168	2388	0	2737	0	1
RVBD1271c:RVBD1271c	5	NonEssential	2	2287	-5.3022	0.715135	2287	0	1541	0	1
RVBD1272c:RVBD1272c	13	NonEssential	4	3768	-4.104	1	3768	0	1590	0	1
RVBD1273c:RVBD1273c	25	NonEssential	6	3556	-4.5368	1	3556	0	1529	0	1
RVBD1274:lprB	12	NonEssential	10	227	-6.3591	0.079228	227	0	3642	0	1
RVBD1275:lprC	8	NonEssential	3	2834	-5.3126	0.897145	2834	1	107	6.187	0.658525
RVBD1276c:RVBD1276c	5	NonEssential	1	3729	-4.6301	1	3729	0	1751	0	1
RVBD1277:RVBD1277	11	NonEssential	7	1123	-4.2847	0.423095	1123	0	2272	0	1
RVBD1278:RVBD1278	7	NonEssential	6	598	-6.0737	0.214698	598	0	1155	0	1
RVBD1279:RVBD1279	11	NonEssential	8	1610	-5.7195	0.563501	1610	0	3859	0	1
RVBD1280c:oppA	10	NonEssential	3	3251	-5.3909	0.997472	3251	0	2604	0	1
RVBD1281c:oppD	10	NonEssential	4	3294	-4.6211	1	3294	0	2059	0	1
RVBD1282c:oppC	14	NonEssential	6	3286	-5.2775	1	3286	0	2608	0	1
RVBD1283c:oppB	6	NonEssential	3	2258	-4.5726	0.714096	2258	0	3274	0	1
RVBD1284:canA	6	NonEssential	4	1652	-5.5714	0.532772	1652	0	1074	0	1
RVBD1285:cysD	11	NonEssential	4	3303	-5.4722	1	3303	1	328	-1.7119	1
RVBD1286:cysN	164	NonEssential	88	2113	-5.4526	0.745312	2113	4	901	-2.0943	1
RVBD1287:RVBD1287	6	NonEssential	6	332	-7.0627	0.10039	332	0	3951	0	1
RVBD1288:RVBD1288	17	NonEssential	10	2704	-5.6608	0.901138	2704	1	195	-1.3004	1
RVBD1289:RVBD1289	8	NonEssential	4	3069	-5.4342	0.947595	3069	0	3467	0	1
RVBD1290A:RVBD1290A	5	NonEssential	3	2173	-5.2317	0.68443	2173	0	2329	0	1
RVBD1290c:RVBD1290c	20	NonEssential	10	2290	-5.3753	0.782939	2290	0	3767	0	1
RVBD1291c:RVBD1291c	4	NonEssential	3	2686	-5.623	0.804696	2686	0	2248	0	1
RVBD1292:argS	143	Essential	52	3872	-4.9114	1	3872	2	1296	-0.26882	1
RVBD1293:lysA	65	Essential	29	3559	-5.0631	1	3559	1	2282	-2.3169	1
RVBD1294:thrA	74	Essential	13	3848	-4.3111	1	3848	3	268	-1.561	1
RVBD1295:thrC	109	Essential	26	3552	-4.764	1	3552	1	2897	-2.254	1
RVBD1296:thrB	101	Essential	34	3500	-5.0299	1	3500	0	3557	0	1
RVBD1297:rho	133	Essential	19	4003	-4.4668	1	4003	3	851	-1.7119	1
RVBD1298:rpmE	6	Essential	2	3442	-4.147	1	3442	0	2136	0	1
RVBD1299:prfA	76	Essential	28	3893	-5.1691	1	3893	2	1390	-2.0707	1
RVBD1300:hemK	77	Essential	30	3358	-5.0315	1	3358	2	67	4.949	0.694109
RVBD1301:RVBD1301	51	Essential	18	3925	-4.9874	1	3925	2	820	-2.1614	1
RVBD1302:rfe	235	Essential	174	13	-6.2091	7e-05	13	3	635	-1.6165	1
RVBD1303:RVBD1303	12	Essential	1	3677	-4.4115	1	3677	1	631	-2.2931	1
RVBD1304:atpB	77	Essential	35	2072	-4.9193	0.727385	2072	1	350	2.3836	1
RVBD1305:atpE	7	NonEssential	2	3716	-4.3649	1	3716	0	1595	0	1
RVBD1306:atpF	64	Essential	16	3886	-4.7732	1	3886	0	2415	0	1
RVBD1307:atpH	123	Essential	39	3871	-4.8599	1	3871	0	3825	0	1
RVBD1308:atpA	118	Essential	33	3973	-4.9617	1	3973	5	207	-1.8411	1
RVBD1309:atpG	66	Essential	16	3930	-4.853	1	3930	2	724	-1.8316	1
RVBD1310:atpD	124	Essential	34	3730	-4.7756	1	3730	10	58	-2.0354	0.664999
RVBD1311:atpC	49	Essential	29	740	-5.8835	0.306028	740	0	3215	0	1
RVBD1312:RVBD1312	7	Essential	5	404	-4.4944	0.143102	404	0	1997	0	1
RVBD1313c:RVBD1313c	8	NonEssential	7	548	-6.3378	0.197076	548	0	3745	0	1
RVBD1314c:RVBD1314c	5	NonEssential	2	2882	-5.421	0.859414	2882	0	3258	0	1
RVBD1315:murA	121	Essential	85	64	-5.8904	7e-05	64	0	3597	0	1
RVBD1316c:ogt	7	NonEssential	2	3595	-4.2778	1	3595	0	1971	0	1
RVBD1317c:alkA	10	NonEssential	8	931	-5.9906	0.338072	931	1	554	-2.2931	1
RVBD1318c:RVBD1318c	12	NonEssential	6	380	-5.1078	0.151426	380	0	3332	0	1
RVBD1319c:RVBD1319c	12	NonEssential	8	1882	-5.9648	0.638578	1882	0	1417	0	1
RVBD1320c:RVBD1320c	13	NonEssential	9	831	-6.0851	0.319704	831	1	94	8.0384	0.799642
RVBD1321:RVBD1321	7	NonEssential	6	816	-5.9205	0.290039	816	0	3685	0	1
RVBD1322:RVBD1322	4	NonEssential	1	3832	-4.4464	1	3832	0	946	0	1
RVBD1322A:RVBD1322A	11	NonEssential	7	1016	-5.5563	0.376782	1016	0	1208	0	1
RVBD1323:fadA4	5	NonEssential	2	2267	-5.0131	0.71303	2267	0	614	0	1
RVBD1324:RVBD1324	5	NonEssential	2	3467	-5.3807	1	3467	0	478	0	1
RVBD1325c:PE-PGRS24	7	NonEssential	3	356	-5.4673	0.119925	356	0	2142	0	1
RVBD1326c:glgB	232	Essential	118	2146	-5.434	0.749986	2146	2	1867	-1.7893	1
RVBD1327c:glgE	176	Essential	98	790	-5.5039	0.317379	790	1	1513	-1.4366	1
RVBD1328:glgP	19	NonEssential	8	2632	-4.9105	0.878537	2632	0	2139	0	1
RVBD1329c:dinG	11	NonEssential	7	2241	-5.5006	0.748652	2241	0	752	0	1
RVBD1330c:pncB1	8	NonEssential	5	2699	-5.598	0.858114	2699	0	1681	0	1
RVBD1331:RVBD1331	4	NonEssential	2	3080	-6.0904	0.893089	3080	0	506	0	1
RVBD1332:RVBD1332	7	NonEssential	5	1121	-5.2743	0.404065	1121	0	3150	0	1
RVBD1333:RVBD1333	8	NonEssential	4	2637	-5.4035	0.841215	2637	0	976	0	1
RVBD1334:mec	5	NonEssential	3	1737	-5.6	0.541884	1737	0	2326	0	1
RVBD1335:cysO	9	NonEssential	4	2033	-4.9875	0.668466	2033	0	1574	0	1
RVBD1336:cysM	8	NonEssential	5	1383	-5.6577	0.468866	1383	0	1607	0	1
RVBD1337:RVBD1337	7	NonEssential	7	233	-5.9645	0.069583	233	0	3992	0	1
RVBD1338:murI	74	Essential	35	2180	-5.5217	0.761456	2180	1	2375	-2.2931	1
RVBD1339:RVBD1339	9	Essential	0	4054	0	1	4054	9	3	7.9236	0.000198
RVBD1340:rphA	6	NonEssential	3	3274	-5.3667	0.977318	3274	0	3184	0	1
RVBD1341:RVBD1341	6	NonEssential	2	1911	-4.9172	0.623739	1911	1	191	-1.561	1
RVBD1342c:RVBD1342c	50	NonEssential	18	3829	-5.1662	1	3829	2	402	-1.892	1
RVBD1343c:lprD	35	Essential	10	3891	-4.71	1	3891	0	2359	0	1
RVBD1344:mbtL	6	NonEssential	4	2563	-5.507	0.787882	2563	0	2482	0	1
RVBD1345:mbtM	7	NonEssential	4	970	-4.9962	0.346007	970	0	1577	0	1
RVBD1346:mbtN	6	NonEssential	5	655	-3.6884	0.233708	655	0	3130	0	1
RVBD1347c:mbtK	5	NonEssential	2	3082	-5.3714	0.919181	3082	0	2490	0	1
RVBD1348:irtA	299	Essential	104	3739	-5.1874	1	3739	4	533	-1.983	1
RVBD1349:irtB	172	NonEssential	83	1918	-5.5074	0.683683	1918	6	96	-1.3935	1
RVBD1350:fabG2	7	NonEssential	6	1026	-5.3958	0.361944	1026	0	3658	0	1
RVBD1351:RVBD1351	5	NonEssential	3	2153	-6.259	0.678254	2153	0	1450	0	1
RVBD1352:RVBD1352	5	NonEssential	2	3622	-4.798	1	3622	0	613	0	1
RVBD1353c:RVBD1353c	7	NonEssential	4	2904	-5.1265	0.895709	2904	0	1357	0	1
RVBD1354c:RVBD1354c	11	NonEssential	7	1655	-5.4242	0.576261	1655	0	2605	0	1
RVBD1355c:moeY	13	NonEssential	7	2769	-5.2356	0.908569	2769	0	2883	0	1
RVBD1356c:RVBD1356c	7	NonEssential	7	292	-4.4808	0.094602	292	0	3968	0	1
RVBD1357c:RVBD1357c	11	NonEssential	5	2703	-5.017	0.881371	2703	0	1150	0	1
RVBD1358:RVBD1358	14	NonEssential	10	795	-5.2801	0.312934	795	0	3067	0	1
RVBD1359:RVBD1359	11	NonEssential	7	2314	-4.7248	0.759787	2314	0	2941	0	1
RVBD1360:RVBD1360	10	NonEssential	6	2019	-5.1606	0.672504	2019	0	2189	0	1
RVBD1361c:PPE19	8	NonEssential	8	236	-6.1913	0.07335	236	0	3993	0	1
RVBD1362c:RVBD1362c	6	NonEssential	3	2673	-3.7992	0.823537	2673	0	831	0	1
RVBD1363c:RVBD1363c	6	NonEssential	5	1588	-6.1383	0.504203	1588	0	2602	0	1
RVBD1364c:RVBD1364c	9	NonEssential	8	249	-6.4215	0.088761	249	0	2725	0	1
RVBD1365c:rsfA	5	NonEssential	2	3367	-5.3022	0.986972	3367	0	973	0	1
RVBD1366:RVBD1366	7	NonEssential	6	884	-5.8835	0.319704	884	0	3307	0	1
RVBD1367c:RVBD1367c	10	NonEssential	6	2852	-4.5715	0.913737	2852	0	1981	0	1
RVBD1368:lprF	6	NonEssential	4	2345	-5.5602	0.732641	2345	0	3587	0	1
RVBD1370c:RVBD1370c	1	NonEssential	1	1015	-4.6964	0.195655	1015	0	3569	0	1
RVBD1371:RVBD1371	26	NonEssential	17	1576	-5.4833	0.576261	1576	0	1567	0	1
RVBD1372:RVBD1372	7	NonEssential	6	561	-6.5155	0.20772	561	0	3306	0	1
RVBD1373:RVBD1373	10	NonEssential	7	1055	-6.0956	0.392199	1055	0	3935	0	1
RVBD1374c:RVBD1374c	6	NonEssential	6	437	-5.121	0.148673	437	0	3893	0	1
RVBD1375:RVBD1375	6	NonEssential	4	2071	-6.0162	0.661116	2071	1	244	-1.7436	1
RVBD1376:RVBD1376	11	NonEssential	6	2867	-5.3858	0.916681	2867	1	581	-2.254	1
RVBD1377c:RVBD1377c	7	NonEssential	4	3030	-5.8183	0.9293	3030	1	179	-1.3594	1
RVBD1378c:RVBD1378c	5	NonEssential	2	2763	-5.4054	0.828364	2763	0	794	0	1
RVBD1379:pyrR	5	Essential	0	3971	-4.8232	1	3971	0	1213	0	1
RVBD1380:pyrB	120	Essential	48	3123	-5.0839	1	3123	6	230	-2.1063	1
RVBD1381:pyrC	85	Essential	25	3366	-4.9079	1	3366	1	492	-1.3004	1
RVBD1382:RVBD1382	45	Essential	11	3699	-5.0249	1	3699	0	2680	0	1
RVBD1383:carA	79	Essential	24	3120	-5.0456	1	3120	3	477	-2.0354	1
RVBD1384:carB	213	Essential	82	2858	-5.1316	0.973615	2858	2	2869	-2.0575	1
RVBD1385:pyrF	64	Essential	28	1452	-5.3295	0.543712	1452	0	3377	0	1
RVBD1386:PE15	5	NonEssential	3	1667	-6.7715	0.526768	1667	0	490	0	1
RVBD1387:PPE20	18	NonEssential	12	1087	-5.6965	0.418978	1087	0	1333	0	1
RVBD1388:mihF	5	Essential	4	805	-5.6944	0.282675	805	0	3511	0	1
RVBD1389:gmk	53	Essential	16	3797	-4.869	1	3797	3	189	-1.6165	1
RVBD1390:rpoZ	16	Essential	4	3796	-4.562	1	3796	0	1265	0	1
RVBD1391:dfp	124	Essential	48	2967	-5.078	0.990922	2967	3	1340	-2.3597	1
RVBD1392:metK	88	Essential	50	1838	-5.5604	0.663502	1838	1	1693	-1.8411	1
RVBD1393c:RVBD1393c	20	NonEssential	10	3107	-5.5982	1	3107	0	3704	0	1
RVBD1394c:cyp132	9	NonEssential	3	3655	-5.3271	1	3655	0	2837	0	1
RVBD1395:RVBD1395	9	NonEssential	8	782	-5.6643	0.296415	782	0	1657	0	1
RVBD1396c:PE-PGRS25	4	NonEssential	2	3370	-5.0284	0.967297	3370	0	1800	0	1
RVBD1397c:vapC10	6	NonEssential	3	907	-4.7809	0.329908	907	0	2041	0	1
RVBD1398c:vapB10	4	NonEssential	2	2521	-4.6733	0.741306	2521	0	1424	0	1
RVBD1399c:nlhH	9	NonEssential	7	902	-6.1949	0.337014	902	0	1923	0	1
RVBD1400c:lipI	11	NonEssential	7	896	-5.6863	0.338072	896	0	1385	0	1
RVBD1401:RVBD1401	9	Essential	7	741	-5.7061	0.275778	741	0	3958	0	1
RVBD1402:priA	193	Essential	104	1685	-5.5134	0.609661	1685	1	3810	-2.3597	1
RVBD1403c:RVBD1403c	8	NonEssential	3	2981	-5.5054	0.934357	2981	0	977	0	1
RVBD1404:RVBD1404	5	NonEssential	3	3208	-5.5074	0.956292	3208	1	290	-2.0467	1
RVBD1405c:RVBD1405c	12	NonEssential	6	3042	-5.3834	0.96908	3042	0	3670	0	1
RVBD1406:fmt	86	Essential	38	2823	-5.217	0.961655	2823	0	3093	0	1
RVBD1407:fmu	5	NonEssential	2	2692	-4.9264	0.806541	2692	0	2244	0	1
RVBD1408:rpe	84	Essential	44	2668	-5.4588	0.916508	2668	0	3110	0	1
RVBD1409:ribG	75	Essential	39	1077	-5.4095	0.423985	1077	2	1186	-2.2352	1
RVBD1410c:RVBD1410c	20	NonEssential	17	113	-6.4793	0.010446	113	0	2023	0	1
RVBD1411c:lprG	7	NonEssential	6	114	-7.5782	0.007983	114	0	3224	0	1
RVBD1412:ribC	4	Essential	1	3634	-4.6034	1	3634	0	1526	0	1
RVBD1413:RVBD1413	7	NonEssential	6	1118	-5.9281	0.402045	1118	0	2185	0	1
RVBD1414:RVBD1414	5	NonEssential	1	3760	-4.7939	1	3760	0	2305	0	1
RVBD1415:ribA2	73	Essential	27	3603	-4.6519	1	3603	4	186	-1.826	1
RVBD1416:ribH	32	Essential	18	1670	-5.6925	0.607244	1670	1	779	-1.8411	1
RVBD1417:RVBD1417	7	NonEssential	4	2431	-5.4486	0.772841	2431	0	1664	0	1
RVBD1418:lprH	7	NonEssential	4	3150	-5.6851	0.968229	3150	1	112	4.7432	0.658525
RVBD1419:RVBD1419	6	NonEssential	5	510	-4.5058	0.171135	510	0	2339	0	1
RVBD1420:uvrC	16	NonEssential	6	3670	-5.2404	1	3670	0	3687	0	1
RVBD1421:RVBD1421	6	NonEssential	6	238	-6.4329	0.061624	238	0	3990	0	1
RVBD1422:RVBD1422	6	NonEssential	6	496	-5.0511	0.165496	496	0	3820	0	1
RVBD1423:whiA	69	Essential	41	592	-5.5604	0.23825	592	0	3345	0	1
RVBD1424c:RVBD1424c	11	NonEssential	3	2610	-5.1744	0.85839	2610	1	503	-2.1419	1
RVBD1425:RVBD1425	13	NonEssential	5	3354	-5.4312	1	3354	0	1728	0	1
RVBD1426c:lipO	7	NonEssential	4	2103	-5.5039	0.676022	2103	0	2983	0	1
RVBD1427c:fadD12	13	NonEssential	9	601	-6.3729	0.233939	601	1	78	9.6586	0.472528
RVBD1428c:RVBD1428c	15	NonEssential	10	1064	-5.6221	0.402779	1064	0	1543	0	1
RVBD1429:RVBD1429	7	NonEssential	4	1820	-4.5907	0.586162	1820	0	1381	0	1
RVBD1430:PE16	22	NonEssential	5	2706	-4.7939	0.905868	2706	0	2325	0	1
RVBD1431:RVBD1431	27	NonEssential	11	3013	-5.4431	0.987339	3013	1	1151	-2.297	1
RVBD1432:RVBD1432	8	NonEssential	6	293	-6.1489	0.10454	293	0	3095	0	1
RVBD1433:RVBD1433	6	NonEssential	4	1881	-5.5655	0.610633	1881	0	1694	0	1
RVBD1434:RVBD1434	2	NonEssential	2	2111	-5.1624	0.577501	2111	0	2643	0	1
RVBD1435c:RVBD1435c	5	NonEssential	3	2785	-5.9303	0.834126	2785	0	1084	0	1
RVBD1436:gap	54	Essential	23	3511	-5.1246	1	3511	3	315	-1.973	1
RVBD1437:pgk	114	Essential	69	674	-5.6871	0.264458	674	2	1768	-2.0898	1
RVBD1438:tpi	33	Essential	22	354	-5.6007	0.146597	354	0	1650	0	1
RVBD1439c:RVBD1439c	5	NonEssential	2	2801	-5.3022	0.839024	2801	0	2322	0	1
RVBD1440:secG	5	Essential	3	1822	-5.4105	0.565084	1822	0	2635	0	1
RVBD1441c:PE-PGRS26	6	NonEssential	4	429	-5.7691	0.142863	429	0	1908	0	1
RVBD1442:bisC	18	NonEssential	7	3450	-5.4367	1	3450	0	1356	0	1
RVBD1443c:RVBD1443c	5	NonEssential	1	2809	-4.5598	0.841215	2809	0	1190	0	1
RVBD1444c:RVBD1444c	2	NonEssential	0	3780	-5.0027	1	3780	0	1303	0	1
RVBD1445c:devB	11	NonEssential	7	1963	-4.4937	0.66019	1963	0	2606	0	1
RVBD1446c:opcA	5	NonEssential	2	3326	-5.8555	0.979552	3326	0	604	0	1
RVBD1447c:zwf2	25	NonEssential	9	3089	-4.6073	1	3089	0	2478	0	1
RVBD1448c:tal	6	NonEssential	4	649	-5.9807	0.228688	649	0	3371	0	1
RVBD1449c:tkt	188	Essential	89	3111	-5.3563	1	3111	4	1586	-2.0915	1
RVBD1450c:PE-PGRS27	11	NonEssential	9	490	-5.1733	0.18884	490	1	561	-2.2067	1
RVBD1451:ctaB	115	Essential	29	3857	-4.9077	1	3857	0	3821	0	1
RVBD1452c:PE-PGRS28	4	NonEssential	1	3290	-5.1884	0.938584	3290	0	2197	0	1
RVBD1453:RVBD1453	6	NonEssential	6	347	-4.8368	0.103739	347	0	3945	0	1
RVBD1454c:qor	10	NonEssential	6	2885	-5.6534	0.919181	2885	0	3140	0	1
RVBD1455:RVBD1455	8	NonEssential	4	2587	-5.391	0.823537	2587	0	1249	0	1
RVBD1456c:RVBD1456c	102	Essential	50	2670	-5.3514	0.906056	2670	0	3538	0	1
RVBD1457c:RVBD1457c	92	NonEssential	39	3001	-5.2687	0.999334	3001	1	2642	-2.254	1
RVBD1458c:RVBD1458c	55	NonEssential	24	3702	-5.3398	1	3702	0	2193	-2.43	1
RVBD1459c:RVBD1459c	206	Essential	153	15	-6.1243	7e-05	15	0	3982	0	1
RVBD1460:RVBD1460	6	NonEssential	4	2134	-5.1901	0.677241	2134	1	249	-1.7817	1
RVBD1461:RVBD1461	169	Essential	59	3589	-5.1118	1	3589	17	28	-1.973	0.005292
RVBD1462:RVBD1462	80	Essential	32	2889	-5.1085	0.983067	2889	2	1064	-0.44541	1
RVBD1463:RVBD1463	100	Essential	23	3745	-4.7032	1	3745	1	2461	-2.2748	1
RVBD1464:csd	120	Essential	63	2427	-5.2868	0.829605	2427	2	1319	-1.785	1
RVBD1465:RVBD1465	33	NonEssential	16	3277	-5.5904	1	3277	1	50	18.248	0.161089
RVBD1466:RVBD1466	2	NonEssential	2	1622	-6.3711	0.436621	1622	0	3099	0	1
RVBD1467c:fadE15	20	NonEssential	6	3623	-5.217	1	3623	1	366	-1.561	1
RVBD1468c:PE-PGRS29	12	NonEssential	4	3736	-5.2356	1	3736	0	1280	0	1
RVBD1469:ctpD	13	NonEssential	5	3234	-4.9126	1	3234	0	1295	0	1
RVBD1470:trxA	5	NonEssential	4	1088	-6.1723	0.369572	1088	0	3182	0	1
RVBD1471:trxB1	6	NonEssential	4	2133	-4.9622	0.677241	2133	0	1244	0	1
RVBD1472:echA12	9	NonEssential	6	1397	-5.8973	0.484939	1397	0	2618	0	1
RVBD1473:RVBD1473	6	NonEssential	4	2308	-4.8185	0.724939	2308	0	2447	0	1
RVBD1473A:RVBD1473A	5	NonEssential	4	2253	-5.7818	0.709688	2253	0	1993	0	1
RVBD1474c:RVBD1474c	7	NonEssential	3	1602	-4.4168	0.527819	1602	0	2236	0	1
RVBD1475c:acn	240	Essential	121	1986	-5.2793	0.701235	1986	3	1687	-1.7119	1
RVBD1476:RVBD1476	80	Essential	60	47	-6.2171	7e-05	47	1	386	1.7832	1
RVBD1477:ripA	139	Essential	69	3212	-5.5545	1	3212	0	3635	0	1
RVBD1478:RVBD1478	7	NonEssential	1	3596	-5.2472	1	3596	0	685	0	1
RVBD1479:moxR1	161	Essential	89	228	-5.6305	0.079307	228	0	3869	0	1
RVBD1480:RVBD1480	65	Essential	18	3575	-4.754	1	3575	1	493	-1.3266	1
RVBD1481:RVBD1481	126	Essential	82	67	-5.7921	7e-05	67	1	778	-1.3266	1
RVBD1482c:RVBD1482c	12	NonEssential	9	918	-5.8388	0.349249	918	0	3579	0	1
RVBD1483:fabG1	49	Essential	24	2577	-5.5917	0.901951	2577	1	471	-1.3503	1
RVBD1484:inhA	77	Essential	48	405	-5.4725	0.166275	405	0	3850	0	1
RVBD1485:hemZ	71	Essential	39	1975	-5.6002	0.699754	1975	2	152	3.4099	1
RVBD1486c:RVBD1486c	11	NonEssential	9	650	-6.0244	0.243451	650	0	1912	0	1
RVBD1487:RVBD1487	9	NonEssential	7	1504	-5.4486	0.522886	1504	0	3175	0	1
RVBD1488:RVBD1488	12	NonEssential	8	1569	-5.918	0.567691	1569	0	2001	0	1
RVBD1489:RVBD1489	5	NonEssential	1	3738	-4.3066	1	3738	0	1412	0	1
RVBD1489A:RVBD1489A	5	NonEssential	3	2688	-5.1917	0.805978	2688	0	439	0	1
RVBD1490:RVBD1490	26	NonEssential	11	3079	-5.3391	1	3079	1	380	-1.4366	1
RVBD1491c:RVBD1491c	8	NonEssential	6	1438	-6.0368	0.4769	1438	0	2212	0	1
RVBD1492:mutA	17	NonEssential	10	2218	-5.3514	0.755996	2218	0	2430	0	1
RVBD1493:mutB	21	NonEssential	13	2030	-5.708	0.716781	2030	1	373	-1.561	1
RVBD1494:mazE4	2	NonEssential	2	318	-4.7986	0.044605	318	0	3955	0	1
RVBD1496:RVBD1496	8	NonEssential	4	2262	-5.2996	0.739548	2262	0	2977	0	1
RVBD1497:lipL	11	NonEssential	4	3734	-4.8896	1	3734	1	637	-2.3597	1
RVBD1498A:RVBD1498A	7	NonEssential	3	2975	-5.1118	0.913848	2975	0	2132	0	1
RVBD1498c:RVBD1498c	10	NonEssential	7	427	-5.2118	0.163474	427	0	2727	0	1
RVBD1499:RVBD1499	5	NonEssential	3	2305	-6.0898	0.716781	2305	0	2111	0	1
RVBD1500:RVBD1500	14	NonEssential	10	1069	-5.6305	0.40135	1069	0	3775	0	1
RVBD1501:RVBD1501	18	NonEssential	10	776	-5.5311	0.312716	776	0	1014	0	1
RVBD1502:RVBD1502	14	NonEssential	9	830	-5.5646	0.324448	830	0	3068	0	1
RVBD1505c:RVBD1505c	5	NonEssential	3	2107	-3.96	0.672504	2107	0	1426	0	1
RVBD1506c:RVBD1506c	10	NonEssential	6	1770	-4.8427	0.596733	1770	0	2145	0	1
RVBD1507A:RVBD1507A	12	NonEssential	7	2729	-4.8443	0.893054	2729	0	1920	0	1
RVBD1507c:RVBD1507c	6	NonEssential	4	407	-5.0793	0.136125	407	0	2278	0	1
RVBD1508A:RVBD1508A	7	NonEssential	4	2251	-5.631	0.732308	2251	0	3612	0	1
RVBD1508c:RVBD1508c	25	NonEssential	11	2170	-5.3958	0.764424	2170	0	1892	0	1
RVBD1509:RVBD1509	14	NonEssential	9	2122	-5.5784	0.717624	2122	0	3285	0	1
RVBD1510:RVBD1510	13	NonEssential	9	554	-5.8292	0.219862	554	0	978	0	1
RVBD1511:gmdA	8	NonEssential	5	2325	-5.1308	0.748652	2325	0	2214	0	1
RVBD1512:epiA	6	NonEssential	5	631	-6.2172	0.222499	631	0	914	0	1
RVBD1513:RVBD1513	16	NonEssential	9	2272	-4.9432	0.761576	2272	0	2330	0	1
RVBD1514c:RVBD1514c	8	NonEssential	3	2741	-4.3694	0.867468	2741	0	1004	0	1
RVBD1515c:RVBD1515c	14	NonEssential	7	2887	-5.0401	0.939659	2887	0	3160	0	1
RVBD1516c:RVBD1516c	11	NonEssential	7	1457	-5.9384	0.527819	1457	0	3254	0	1
RVBD1517:RVBD1517	15	NonEssential	11	707	-5.8483	0.275841	707	0	1617	0	1
RVBD1518:RVBD1518	12	NonEssential	9	895	-6.0537	0.346007	895	0	2416	0	1
RVBD1519:RVBD1519	4	NonEssential	1	3793	-4.9617	1	3793	0	564	0	1
RVBD1520:RVBD1520	12	NonEssential	10	499	-4.3514	0.192909	499	0	2824	0	1
RVBD1521:fadD25	22	NonEssential	12	2767	-5.2898	0.923731	2767	0	2509	0	1
RVBD1522c:mmpL12	27	NonEssential	13	3204	-5.3988	1	3204	1	1175	-2.3169	1
RVBD1523:RVBD1523	12	NonEssential	8	1201	-4.9275	0.437985	1201	0	3556	0	1
RVBD1524:RVBD1524	7	NonEssential	4	2344	-5.7888	0.749986	2344	0	1041	0	1
RVBD1525:wbbL2	8	NonEssential	4	1470	-6.31	0.486597	1470	0	1001	0	1
RVBD1526c:RVBD1526c	12	NonEssential	7	915	-6.3226	0.348472	915	0	766	0	1
RVBD1527c:pks5	35	NonEssential	12	2160	-5.3869	0.775126	2160	1	1331	-2.254	1
RVBD1528c:papA4	8	NonEssential	6	1448	-5.4998	0.480586	1448	0	2773	0	1
RVBD1529:fadD24	14	NonEssential	11	746	-5.9227	0.290039	746	0	3931	0	1
RVBD1530:adh	5	NonEssential	2	3245	-4.6378	0.965923	3245	0	1077	0	1
RVBD1531:RVBD1531	8	NonEssential	7	747	-5.8318	0.264458	747	0	3839	0	1
RVBD1532c:RVBD1532c	5	NonEssential	1	3725	-4.5573	1	3725	0	676	0	1
RVBD1533:RVBD1533	8	NonEssential	7	541	-5.3278	0.195655	541	0	2884	0	1
RVBD1534:RVBD1534	6	NonEssential	3	2279	-4.8464	0.716117	2279	1	190	-1.561	1
RVBD1535:RVBD1535	5	NonEssential	2	2484	-4.2553	0.749986	2484	0	1570	0	1
RVBD1536:ileS	336	Essential	92	3794	-4.7939	1	3794	7	201	-1.5642	1
RVBD1537:dinX	10	NonEssential	6	2195	-5.5952	0.733016	2195	0	2735	0	1
RVBD1538c:ansA	5	NonEssential	2	2467	-5.3742	0.748652	2467	0	1050	0	1
RVBD1539:lspA	76	Essential	36	3304	-5.3125	1	3304	1	552	-1.3266	1
RVBD1540:RVBD1540	58	NonEssential	17	3522	-5.1265	1	3522	0	2988	0	1
RVBD1541c:lprI	9	NonEssential	4	1714	-5.4833	0.588269	1714	0	3118	0	1
RVBD1542c:glbN	7	NonEssential	3	3288	-5.095	0.990877	3288	0	2522	0	1
RVBD1543:RVBD1543	7	NonEssential	5	1194	-5.4588	0.423985	1194	0	2959	0	1
RVBD1544:RVBD1544	13	NonEssential	6	3182	-5.0631	0.999334	3182	0	2738	0	1
RVBD1545:RVBD1545	6	NonEssential	0	3960	-4.4383	1	3960	0	891	0	1
RVBD1547:dnaE1	342	Essential	100	3873	-5.2401	1	3873	66	1	-1.561	0.000198
RVBD1548c:PPE21	9	NonEssential	4	2781	-5.0628	0.882698	2781	0	3133	0	1
RVBD1549:fadD11.1	6	NonEssential	2	3307	-5.1809	0.985009	3307	0	1013	0	1
RVBD1550:fadD11	10	NonEssential	7	917	-5.3296	0.336939	917	0	2758	0	1
RVBD1551:plsB1	19	NonEssential	10	3034	-5.5311	0.987335	3034	0	2717	0	1
RVBD1552:frdA	16	NonEssential	9	2979	-5.1434	0.973615	2979	0	2580	0	1
RVBD1553:frdB	10	NonEssential	4	2058	-5.3574	0.683683	2058	0	1510	0	1
RVBD1554:frdC	8	NonEssential	5	1525	-5.9514	0.508595	1525	0	1269	0	1
RVBD1555:frdD	5	NonEssential	4	996	-5.3154	0.350177	996	0	1553	0	1
RVBD1556:RVBD1556	6	NonEssential	4	1922	-5.2046	0.627957	1922	0	3207	0	1
RVBD1557:mmpL6	15	NonEssential	9	1442	-4.9617	0.533602	1442	0	2755	0	1
RVBD1558:RVBD1558	4	NonEssential	2	3063	-5.8065	0.886558	3063	0	1370	0	1
RVBD1559:ilvA	80	Essential	17	3985	-4.5452	1	3985	2	669	-1.8217	1
RVBD1560:vapB11	3	NonEssential	2	2620	-5.5217	0.737409	2620	0	2655	0	1
RVBD1561:vapC11	6	NonEssential	3	1843	-6.6296	0.601956	1843	0	521	0	1
RVBD1562c:treZ	13	NonEssential	6	3477	-5.69	1	3477	0	1272	0	1
RVBD1563c:treY	16	NonEssential	10	1172	-5.9808	0.44209	1172	0	3607	0	1
RVBD1564c:treX	13	NonEssential	8	2585	-5.421	0.858114	2585	0	2458	0	1
RVBD1565c:RVBD1565c	25	Essential	24	25	-7.3173	7e-05	25	0	4040	0	1
RVBD1566c:RVBD1566c	14	NonEssential	10	323	-6.1958	0.125246	323	0	3582	0	1
RVBD1567c:RVBD1567c	9	NonEssential	7	185	-4.6213	0.042481	185	1	392	-2.0058	1
RVBD1568:bioA	83	NonEssential	38	3567	-5.4485	1	3567	1	2652	-2.3169	1
RVBD1569:bioF1	140	NonEssential	60	1779	-5.3107	0.643945	1779	2	273	2.4259	1
RVBD1570:bioD	36	NonEssential	13	2658	-5.0819	0.910229	2658	3	123	-1.7817	1
RVBD1571:RVBD1571	4	NonEssential	2	3242	-5.613	0.928829	3242	0	2524	0	1
RVBD1572c:RVBD1572c	8	NonEssential	4	2473	-5.2746	0.783429	2473	0	1209	0	1
RVBD1573:RVBD1573	6	NonEssential	0	3946	-4.2512	1	3946	1	279	-1.9429	1
RVBD1574:RVBD1574	8	NonEssential	3	3010	-5.4481	0.93624	3010	0	1996	0	1
RVBD1576c:RVBD1576c	130	NonEssential	63	3295	-5.3034	1	3295	5	240	-1.7817	1
RVBD1577c:RVBD1577c	74	NonEssential	39	2336	-5.3825	0.810625	2336	1	902	-1.561	1
RVBD1578c:RVBD1578c	6	NonEssential	1	3569	-5.0673	1	3569	0	1902	0	1
RVBD1579c:RVBD1579c	9	NonEssential	5	1943	-6.1859	0.639545	1943	0	3667	0	1
RVBD1580c:RVBD1580c	6	NonEssential	4	2471	-5.8406	0.757715	2471	0	451	0	1
RVBD1581c:RVBD1581c	5	NonEssential	4	1006	-4.7466	0.358399	1006	0	2238	0	1
RVBD1582c:RVBD1582c	8	NonEssential	4	2873	-3.0244	0.907069	2873	0	2851	0	1
RVBD1583c:RVBD1583c	5	NonEssential	3	2269	-6.1975	0.71303	2269	0	2449	0	1
RVBD1584c:RVBD1584c	5	NonEssential	2	3405	-5.6223	0.990877	3405	0	2902	0	1
RVBD1585c:RVBD1585c	4	NonEssential	1	3732	-5.3114	1	3732	0	947	0	1
RVBD1586c:RVBD1586c	7	NonEssential	3	892	-4.9756	0.320015	892	0	1342	0	1
RVBD1587c:RVBD1587c	3	NonEssential	1	3492	-4.6891	0.972709	3492	0	1187	0	1
RVBD1588c:RVBD1588c	4	NonEssential	1	3803	-5.1498	1	3803	0	1811	0	1
RVBD1589:bioB	114	NonEssential	56	3270	-5.3312	1	3270	2	215	2.7688	1
RVBD1590:RVBD1590	14	NonEssential	8	1639	-5.8406	0.596897	1639	0	1539	0	1
RVBD1591:RVBD1591	8	NonEssential	6	1344	-6.0842	0.464491	1344	0	1987	0	1
RVBD1592c:RVBD1592c	12	NonEssential	6	961	-4.7756	0.35871	961	0	1043	0	1
RVBD1593c:RVBD1593c	6	NonEssential	3	3200	-5.7626	0.956658	3200	0	1722	0	1
RVBD1594:nadA	124	Essential	31	3371	-4.6541	1	3371	7	148	-1.7436	1
RVBD1595:nadB	125	Essential	42	3675	-4.9403	1	3675	5	385	-2.1773	1
RVBD1596:nadC	92	Essential	42	3040	-5.3303	1	3040	1	2429	-2.142	1
RVBD1597:RVBD1597	10	NonEssential	5	2529	-3.851	0.8234	2529	0	1762	0	1
RVBD1598c:RVBD1598c	5	NonEssential	4	1865	-5.8421	0.579727	1865	0	1060	0	1
RVBD1599:hisD	120	Essential	44	3846	-5.0495	1	3846	4	792	-2.0751	1
RVBD1600:hisC1	113	Essential	32	3470	-4.8235	1	3470	5	111	-2.0424	1
RVBD1601:hisB	41	Essential	19	3362	-4.6045	1	3362	3	224	-2.0354	1
RVBD1602:hisH	59	Essential	22	3112	-4.9763	1	3112	0	3646	0	1
RVBD1603:hisA	55	Essential	22	3312	-5.3022	1	3312	0	2595	0	1
RVBD1604:impA	8	Essential	3	3244	-3.8748	0.988393	3244	0	1643	0	1
RVBD1605:hisF	78	Essential	35	3472	-5.1147	1	3472	0	3348	0	1
RVBD1606:hisI	40	Essential	16	3423	-5.389	1	3423	1	518	-1.4366	1
RVBD1607:chaA	9	NonEssential	7	428	-5.6442	0.155157	428	0	2976	0	1
RVBD1608c:bcpB	9	NonEssential	7	627	-6.0429	0.233708	627	0	3412	0	1
RVBD1609:trpE	138	Essential	74	887	-5.4858	0.350177	887	1	1459	-1.561	1
RVBD1610:RVBD1610	75	Essential	40	2770	-5.3917	0.944744	2770	0	3618	0	1
RVBD1611:trpC	77	Essential	56	100	-5.8308	0.004662	100	1	1873	-2.0058	1
RVBD1612:trpB	140	Essential	80	1109	-5.5311	0.423985	1109	1	3201	-2.2067	1
RVBD1613:trpA	58	Essential	37	820	-5.69	0.336939	820	0	3458	0	1
RVBD1614:lgt	111	Essential	70	234	-5.7728	0.081122	234	1	1834	-1.7436	1
RVBD1615:RVBD1615	6	NonEssential	3	3002	-5.7515	0.913166	3002	0	2514	0	1
RVBD1616:RVBD1616	5	NonEssential	2	3237	-5.3911	0.961122	3237	0	2065	0	1
RVBD1617:pykA	89	Essential	50	1276	-5.2623	0.474428	1276	1	1980	-1.973	1
RVBD1618:tesB1	6	NonEssential	3	2409	-4.2249	0.748652	2409	0	2502	0	1
RVBD1619:RVBD1619	11	NonEssential	5	2458	-4.7732	0.807669	2458	0	2437	0	1
RVBD1620c:cydC	7	NonEssential	6	78	-7.8792	0.000193	78	1	198	1.3362	1
RVBD1621c:cydD	8	NonEssential	7	95	-7.3178	0.002475	95	0	3862	0	1
RVBD1622c:cydB	21	Essential	20	32	-7.215	7e-05	32	0	4049	0	1
RVBD1623c:cydA	12	Essential	12	29	-7.098	7e-05	29	0	4054	0	1
RVBD1624c:RVBD1624c	13	NonEssential	9	1906	-4.7939	0.660022	1906	0	3378	0	1
RVBD1625c:cya	8	NonEssential	5	1338	-4.5149	0.460643	1338	0	2504	0	1
RVBD1626:RVBD1626	5	NonEssential	1	3866	-5.0525	1	3866	0	1514	0	1
RVBD1627c:RVBD1627c	6	NonEssential	2	2980	-5.1505	0.913166	2980	0	1375	0	1
RVBD1628c:RVBD1628c	5	NonEssential	2	2278	-3.8425	0.713304	2278	0	424	0	1
RVBD1629:polA	167	Essential	97	762	-5.6511	0.308571	762	0	3926	0	1
RVBD1630:rpsA	106	Essential	17	3610	-4.764	1	3610	3	543	-1.9031	1
RVBD1631:coaE	95	Essential	56	642	-5.6043	0.257842	642	0	3365	0	1
RVBD1632c:RVBD1632c	5	NonEssential	4	353	-4.9034	0.097805	353	0	2456	0	1
RVBD1633:uvrB	19	NonEssential	11	1507	-6.1933	0.556402	1507	0	991	0	1
RVBD1634:RVBD1634	8	NonEssential	6	1566	-6.3411	0.521811	1566	0	1144	0	1
RVBD1635c:RVBD1635c	20	NonEssential	12	1353	-5.9205	0.494152	1353	0	1598	0	1
RVBD1636:TB15.3	18	Essential	11	799	-5.5245	0.325468	799	0	3629	0	1
RVBD1637c:RVBD1637c	5	NonEssential	5	891	-5.9188	0.315949	891	0	3636	0	1
RVBD1638:uvrA	25	NonEssential	12	1210	-5.3654	0.455769	1210	0	1806	0	1
RVBD1638A:RVBD1638A	2	NonEssential	2	2339	-6.3246	0.641301	2339	0	2450	0	1
RVBD1639c:RVBD1639c	9	NonEssential	5	1161	-5.3022	0.423985	1161	0	2460	0	1
RVBD1640c:lysX	30	NonEssential	16	1406	-5.3402	0.516345	1406	0	3369	0	1
RVBD1641:infC	31	Essential	6	3802	-4.6469	1	3802	4	101	-2.1643	0.878245
RVBD1642:rpmI	20	Essential	0	4047	-4.4628	1	4047	0	1036	0	1
RVBD1643:rplT	15	Essential	1	4015	-4.0631	1	4015	0	1882	0	1
RVBD1644:tsnR	6	NonEssential	4	1936	-5.7785	0.628923	1936	0	3514	0	1
RVBD1645c:RVBD1645c	12	NonEssential	6	2646	-5.4297	0.867179	2646	1	558	-2.142	1
RVBD1646:PE17	13	NonEssential	8	2130	-5.6875	0.71303	2130	0	1138	0	1
RVBD1647:RVBD1647	6	NonEssential	6	381	-6.7319	0.124822	381	0	3805	0	1
RVBD1648:RVBD1648	6	NonEssential	5	1134	-6.0225	0.396923	1134	0	3533	0	1
RVBD1649:pheS	108	Essential	30	3721	-4.8801	1	3721	4	500	-1.9892	1
RVBD1650:pheT	227	Essential	63	3993	-4.9569	1	3993	4	2150	-2.0915	1
RVBD1651c:PE-PGRS30	15	NonEssential	10	1112	-6.0944	0.422652	1112	0	3622	0	1
RVBD1652:argC	117	Essential	52	3007	-5.4338	1	3007	3	870	-1.8411	1
RVBD1653:argJ	102	Essential	49	2972	-5.3312	0.991167	2972	1	680	-1.3266	1
RVBD1654:argB	75	Essential	37	2940	-5.3955	0.990922	2940	1	2559	-2.3597	1
RVBD1655:argD	96	Essential	46	3393	-5.6159	1	3393	3	758	-2.0058	1
RVBD1656:argF	113	Essential	59	2679	-5.3126	0.909366	2679	1	2417	-2.0058	1
RVBD1657:argR	6	Essential	5	821	-6.1484	0.297717	821	0	3434	0	1
RVBD1658:argG	65	Essential	34	1873	-5.3563	0.672504	1873	1	1713	-2.0354	1
RVBD1659:argH	120	Essential	46	767	-5.1937	0.312196	767	2	1959	-2.0985	1
RVBD1660:pks10	8	NonEssential	4	2926	-5.258	0.919956	2926	0	3631	0	1
RVBD1661:pks7	27	NonEssential	12	3033	-5.5105	0.990922	3033	0	2343	0	1
RVBD1662:pks8	27	NonEssential	15	1747	-5.4486	0.637024	1747	0	1443	0	1
RVBD1663:pks17	14	NonEssential	6	3052	-5.2481	0.981785	3052	0	3713	0	1
RVBD1664:pks9	18	NonEssential	11	1417	-5.7301	0.522886	1417	0	2987	0	1
RVBD1665:pks11	8	NonEssential	5	1000	-4.2512	0.361944	1000	0	1851	0	1
RVBD1666c:cyp139	8	NonEssential	2	2997	-5.2743	0.93484	2997	0	841	0	1
RVBD1667c:RVBD1667c	7	NonEssential	6	231	-4.5407	0.068709	231	0	1471	0	1
RVBD1668c:RVBD1668c	4	NonEssential	1	2651	-5.2801	0.788774	2651	0	2541	0	1
RVBD1669:RVBD1669	6	NonEssential	4	2327	-5.3451	0.727385	2327	0	3375	0	1
RVBD1670:RVBD1670	7	NonEssential	3	2436	-3.4484	0.776797	2436	0	1180	0	1
RVBD1671:RVBD1671	7	NonEssential	6	922	-6.1243	0.329244	922	0	2874	0	1
RVBD1672c:RVBD1672c	16	NonEssential	7	3545	-5.1222	1	3545	0	3041	0	1
RVBD1673c:RVBD1673c	11	NonEssential	8	1568	-5.7328	0.551254	1568	0	3268	0	1
RVBD1674c:RVBD1674c	6	NonEssential	3	3397	-5.7061	1	3397	1	278	-1.9429	1
RVBD1675c:cmr	10	NonEssential	7	2068	-5.6221	0.685426	2068	0	3773	0	1
RVBD1676:RVBD1676	6	NonEssential	4	854	-5.9734	0.306175	854	1	95	5.4238	0.576325
RVBD1677:dsbF	6	NonEssential	3	3407	-5.5547	1	3407	0	3186	0	1
RVBD1678:RVBD1678	7	NonEssential	5	1206	-5.095	0.431482	1206	0	2395	0	1
RVBD1679:fadE16	13	NonEssential	6	2623	-5.4857	0.866544	2623	0	3771	0	1
RVBD1680:RVBD1680	8	NonEssential	5	2719	-5.4084	0.865056	2719	0	810	0	1
RVBD1681:moeX	8	NonEssential	5	2557	-5.8241	0.814973	2557	1	105	5.8625	0.658525
RVBD1682:RVBD1682	11	NonEssential	8	1743	-4.9264	0.601489	1743	0	3625	0	1
RVBD1683:RVBD1683	19	Essential	13	643	-5.6554	0.261073	643	0	1263	0	1
RVBD1684:RVBD1684	36	Essential	20	781	-5.8565	0.325468	781	1	1365	-2.254	1
RVBD1685c:RVBD1685c	7	NonEssential	5	1802	-6.0121	0.585039	1802	1	465	-2.3597	1
RVBD1686c:RVBD1686c	6	NonEssential	4	1866	-5.7559	0.607244	1866	0	1603	0	1
RVBD1687c:RVBD1687c	6	NonEssential	3	1630	-5.0541	0.527819	1630	0	1374	0	1
RVBD1688:mpg	4	NonEssential	3	1733	-5.5711	0.53231	1733	0	2712	0	1
RVBD1689:tyrS	99	Essential	38	3869	-5.1332	1	3869	1	769	-1.3503	1
RVBD1690:lprJ	5	NonEssential	4	1431	-3.2348	0.451627	1431	0	2630	0	1
RVBD1691:RVBD1691	5	NonEssential	1	3835	-4.3864	1	3835	0	1058	0	1
RVBD1692:RVBD1692	6	NonEssential	4	1965	-6.159	0.637902	1965	1	377	-2.254	1
RVBD1693:RVBD1693	6	NonEssential	4	604	-6.1374	0.215275	604	0	2537	0	1
RVBD1694:tlyA	7	Essential	5	589	-6.1757	0.212036	589	0	3399	0	1
RVBD1695:ppnK	66	Essential	41	525	-5.7258	0.21574	525	1	1584	-1.973	1
RVBD1696:recN	6	NonEssential	5	410	-6.668	0.137553	410	0	1744	0	1
RVBD1697:RVBD1697	108	Essential	75	72	-5.958	0.000193	72	2	860	-1.7735	1
RVBD1698:mctB	9	NonEssential	6	1122	-6.1641	0.418978	1122	0	2441	0	1
RVBD1699:pyrG	177	Essential	94	1048	-5.5039	0.402779	1048	3	2364	-2.0354	1
RVBD1700:RVBD1700	5	NonEssential	3	2034	-5.0094	0.641965	2034	0	1178	0	1
RVBD1701:RVBD1701	8	NonEssential	7	430	-6.3948	0.157548	430	0	3103	0	1
RVBD1702c:RVBD1702c	118	NonEssential	47	3306	-5.1332	1	3306	1	2283	-1.9429	1
RVBD1703c:RVBD1703c	6	NonEssential	3	2754	-5.2833	0.851708	2754	0	2912	0	1
RVBD1704c:cycA	20	NonEssential	8	2167	-5.068	0.750394	2167	0	2546	0	1
RVBD1705c:PPE22	4	NonEssential	0	3867	-4.4045	1	3867	0	1271	0	1
RVBD1706A:RVBD1706A	6	NonEssential	5	1315	-4.5498	0.434497	1315	0	3459	0	1
RVBD1706c:PPE23	6	NonEssential	3	3328	-4.7354	0.989048	3328	0	733	0	1
RVBD1707:RVBD1707	13	NonEssential	8	1271	-5.4741	0.470666	1271	1	196	-1.3266	1
RVBD1708:RVBD1708	111	Essential	79	68	-5.8824	7e-05	68	1	2710	-2.142	1
RVBD1709:scpA	6	NonEssential	4	1312	-4.3072	0.434497	1312	0	2391	0	1
RVBD1710:scpB	6	Essential	5	708	-5.2684	0.250463	708	0	3134	0	1
RVBD1711:RVBD1711	52	NonEssential	29	287	-5.3884	0.118387	287	0	3913	0	1
RVBD1712:cmk	58	Essential	26	2859	-5.4008	0.973244	2859	2	532	-1.7048	1
RVBD1713:engA	85	Essential	45	2645	-5.4026	0.907069	2645	0	3764	0	1
RVBD1714:RVBD1714	7	NonEssential	5	1803	-5.907	0.585039	1803	0	2521	0	1
RVBD1715:fadB3	7	NonEssential	5	874	-6.309	0.309132	874	0	1925	0	1
RVBD1716:RVBD1716	7	NonEssential	3	3436	-4.6368	1	3436	0	2067	0	1
RVBD1717:RVBD1717	5	NonEssential	1	2662	-4.9566	0.800668	2662	1	310	-2.142	1
RVBD1718:RVBD1718	7	NonEssential	4	3159	-5.8554	0.970134	3159	0	730	0	1
RVBD1719:RVBD1719	8	NonEssential	6	1928	-5.8504	0.637545	1928	0	3162	0	1
RVBD1720c:vapC12	5	NonEssential	4	2064	-5.7491	0.649973	2064	0	1479	0	1
RVBD1721c:vapB12	9	NonEssential	7	1550	-5.6871	0.529709	1550	0	2587	0	1
RVBD1722:RVBD1722	13	NonEssential	8	1456	-6.0729	0.531595	1456	1	343	-1.7058	1
RVBD1723:RVBD1723	8	NonEssential	5	2786	-5.7509	0.878537	2786	0	3273	0	1
RVBD1724c:RVBD1724c	7	NonEssential	5	1690	-5.0221	0.5497	1690	0	1253	0	1
RVBD1725c:RVBD1725c	7	NonEssential	6	1182	-6.2461	0.423095	1182	0	3734	0	1
RVBD1726:RVBD1726	6	NonEssential	1	3490	-5.1573	1	3490	0	1045	0	1
RVBD1727:RVBD1727	6	NonEssential	3	2487	-4.5704	0.759787	2487	1	334	-2.1419	1
RVBD1728c:RVBD1728c	6	NonEssential	5	1700	-5.4817	0.555289	1700	0	2700	0	1
RVBD1729c:RVBD1729c	6	NonEssential	2	3334	-4.9281	0.989048	3334	0	1054	0	1
RVBD1730c:RVBD1730c	13	NonEssential	7	2047	-4.7033	0.689412	2047	1	197	-1.3266	1
RVBD1731:gabD2	15	NonEssential	7	2282	-5.2743	0.762082	2282	0	2436	0	1
RVBD1732c:RVBD1732c	6	NonEssential	1	3809	-4.4995	1	3809	0	670	0	1
RVBD1733c:RVBD1733c	8	NonEssential	5	1432	-4.9229	0.476037	1432	0	2786	0	1
RVBD1734c:RVBD1734c	5	NonEssential	2	2772	-4.1173	0.828878	2772	0	728	0	1
RVBD1735Ac:RVBD1735Ac	6	NonEssential	5	390	-5.1355	0.128919	390	0	2262	0	1
RVBD1735c:RVBD1735c	6	NonEssential	2	2363	-5.0267	0.737409	2363	0	1214	0	1
RVBD1736c:narX	13	NonEssential	9	1919	-5.6651	0.660434	1919	0	2506	0	1
RVBD1737c:narK2	16	NonEssential	9	921	-5.4667	0.356891	921	0	1846	0	1
RVBD1738:RVBD1738	2	NonEssential	2	1686	-6.4655	0.451539	1686	0	3043	0	1
RVBD1739c:RVBD1739c	23	NonEssential	12	2978	-5.6223	0.983067	2978	0	1734	0	1
RVBD1740:vapB34	6	NonEssential	2	1833	-5.161	0.599703	1833	0	2556	0	1
RVBD1741:vapC34	7	NonEssential	6	847	-3.8318	0.305116	847	0	2597	0	1
RVBD1742:RVBD1742	5	NonEssential	2	2127	-5.1546	0.672504	2127	0	2112	0	1
RVBD1743:pknE	11	NonEssential	8	403	-6.2712	0.161208	403	0	1278	0	1
RVBD1744c:RVBD1744c	2	NonEssential	0	3642	-5.365	1	3642	0	1601	0	1
RVBD1745c:idi	6	NonEssential	2	3539	-5.1114	1	3539	0	795	0	1
RVBD1746:pknF	11	NonEssential	7	1662	-5.4297	0.580197	1662	0	3754	0	1
RVBD1747:RVBD1747	24	NonEssential	17	725	-5.7373	0.295195	725	0	2008	0	1
RVBD1748:RVBD1748	8	NonEssential	6	1650	-5.7491	0.543712	1650	0	1176	0	1
RVBD1749c:RVBD1749c	7	NonEssential	6	1140	-5.6608	0.409716	1140	0	3688	0	1
RVBD1750c:fadD1	15	NonEssential	6	3142	-4.6513	0.997472	3142	0	1682	0	1
RVBD1751:RVBD1751	15	NonEssential	6	2622	-4.6593	0.871296	2622	0	2921	0	1
RVBD1752:RVBD1752	7	NonEssential	3	3582	-5.6177	1	3582	0	911	0	1
RVBD1753c:PPE24	32	NonEssential	23	280	-5.7854	0.11319	280	0	3969	0	1
RVBD1754c:RVBD1754c	18	NonEssential	7	2682	-5.2058	0.895926	2682	0	3462	0	1
RVBD1755c:plcD	14	NonEssential	4	3571	-5.1147	1	3571	0	783	0	1
RVBD1758:cut1	6	NonEssential	5	671	-3.5389	0.233939	671	0	2118	0	1
RVBD1759c:wag22	15	NonEssential	5	2013	-4.8787	0.692886	2013	0	1928	0	1
RVBD1760:RVBD1760	18	NonEssential	7	3157	-5.0735	1	3157	0	2024	0	1
RVBD1761c:RVBD1761c	7	NonEssential	3	2037	-4.4712	0.657455	2037	0	1332	0	1
RVBD1762c:RVBD1762c	7	NonEssential	6	516	-4.7656	0.18904	516	0	3793	0	1
RVBD1765A:RVBD1765A	8	NonEssential	5	1956	-5.4405	0.651767	1956	0	2358	0	1
RVBD1765c:RVBD1765c	5	NonEssential	4	2266	-4.7371	0.71303	2266	0	1307	0	1
RVBD1766:RVBD1766	5	NonEssential	4	1544	-5.4722	0.474428	1544	0	3328	0	1
RVBD1767:RVBD1767	5	NonEssential	2	3386	-5.1349	0.988773	3386	0	2532	0	1
RVBD1768:PE-PGRS31	14	NonEssential	8	2335	-5.2938	0.774204	2335	0	3558	0	1
RVBD1769:RVBD1769	6	NonEssential	6	425	-5.3549	0.142743	425	0	3905	0	1
RVBD1770:RVBD1770	10	NonEssential	7	869	-6.1973	0.324448	869	0	3413	0	1
RVBD1771:RVBD1771	18	NonEssential	12	1138	-5.2308	0.434497	1138	0	3487	0	1
RVBD1772:RVBD1772	4	NonEssential	2	1173	-5.1901	0.376252	1173	0	2574	0	1
RVBD1773c:RVBD1773c	6	NonEssential	5	1225	-6.0562	0.421268	1225	0	3008	0	1
RVBD1774:RVBD1774	9	NonEssential	5	711	-4.3301	0.263233	711	0	2485	0	1
RVBD1775:RVBD1775	7	NonEssential	6	447	-6.6225	0.163474	447	0	2661	0	1
RVBD1776c:RVBD1776c	6	NonEssential	3	1646	-4.4846	0.53231	1646	0	1420	0	1
RVBD1777:cyp144	14	NonEssential	6	2877	-5.5884	0.938365	2877	0	2545	0	1
RVBD1778c:RVBD1778c	6	NonEssential	3	2544	-4.7076	0.779898	2544	0	2295	0	1
RVBD1779c:RVBD1779c	9	NonEssential	8	727	-5.6903	0.267543	727	0	3967	0	1
RVBD1780:RVBD1780	9	NonEssential	8	359	-6.1494	0.13566	359	0	2368	0	1
RVBD1781c:malQ	11	NonEssential	5	1042	-5.0131	0.382599	1042	0	3519	0	1
RVBD1782:eccB5	105	Essential	4	4052	-4.2147	1	4052	32	2	-1.9744	0.000198
RVBD1783:eccC5	358	Essential	51	3927	-4.5354	1	3927	48	4	-1.9429	0.000198
RVBD1785c:cyp143	10	NonEssential	6	2192	-5.9374	0.731683	2192	0	1468	0	1
RVBD1786:RVBD1786	7	NonEssential	3	2876	-5.3911	0.888682	2876	0	2201	0	1
RVBD1787:PPE25	6	NonEssential	1	3718	-4.4628	1	3718	0	516	0	1
RVBD1788:PE18	5	NonEssential	1	3814	-5.0383	1	3814	1	338	-2.254	1
RVBD1789:PPE26	6	NonEssential	4	1872	-6.126	0.608455	1872	0	2271	0	1
RVBD1790:PPE27	5	NonEssential	1	3554	-4.7981	1	3554	0	1711	0	1
RVBD1791:PE19	5	NonEssential	2	3349	-3.8529	0.983067	3349	0	514	0	1
RVBD1792A:RVBD1792A	2	NonEssential	2	1680	-3.0319	0.448557	1680	0	3051	0	1
RVBD1793:esxN	1	NonEssential	0	3924	0	1	3924	1	145	0.93457	0.79769
RVBD1794:RVBD1794	73	Essential	15	3863	-4.2778	1	3863	4	174	-0.22875	1
RVBD1795:eccD5	199	Essential	11	4028	-3.9444	1	4028	32	10	-1.9031	0.000198
RVBD1796:mycP5	146	Essential	27	3926	-4.5595	1	3926	4	1131	-2.2931	1
RVBD1797:eccE5	68	Essential	4	4009	-3.915	1	4009	8	48	-2.1419	0.219747
RVBD1798:eccA5	19	NonEssential	3	3990	-4.2597	1	3990	1	410	-1.6165	1
RVBD1800:PPE28	13	NonEssential	7	1103	-5.6833	0.418255	1103	0	1729	0	1
RVBD1801:PPE29	8	NonEssential	7	904	-5.9564	0.330544	904	0	3418	0	1
RVBD1802:PPE30	10	NonEssential	6	2640	-5.6648	0.857331	2640	0	2833	0	1
RVBD1803c:PE-PGRS32	6	NonEssential	4	2408	-5.4346	0.748652	2408	0	1548	0	1
RVBD1804c:RVBD1804c	5	NonEssential	2	2578	-5.1118	0.778827	2578	0	2721	0	1
RVBD1805c:RVBD1805c	6	NonEssential	3	2080	-5.6961	0.666792	2080	0	1916	0	1
RVBD1806:PE20	6	NonEssential	2	757	-5.3497	0.267777	757	0	1046	0	1
RVBD1807:PPE31	8	NonEssential	4	1378	-4.4995	0.468866	1378	1	352	-1.973	1
RVBD1808:PPE32	6	NonEssential	2	2966	-4.9422	0.910229	2966	0	1166	0	1
RVBD1809:PPE33	7	NonEssential	3	3524	-5.5039	1	3524	0	3552	0	1
RVBD1810:RVBD1810	6	NonEssential	4	2655	-5.7526	0.814516	2655	0	784	0	1
RVBD1811:mgtC	5	NonEssential	3	2920	-4.6626	0.870601	2920	0	653	0	1
RVBD1812c:RVBD1812c	5	NonEssential	2	2415	-5.3312	0.737409	2415	0	2893	0	1
RVBD1813c:RVBD1813c	6	NonEssential	2	2761	-4.4712	0.854216	2761	0	1029	0	1
RVBD1814:erg3	17	NonEssential	10	2186	-5.3563	0.749986	2186	0	2629	0	1
RVBD1815:RVBD1815	7	NonEssential	6	254	-6.7716	0.079188	254	0	2694	0	1
RVBD1816:RVBD1816	6	NonEssential	4	2149	-5.0742	0.681095	2149	0	2613	0	1
RVBD1817:RVBD1817	10	NonEssential	5	2586	-5.5682	0.841215	2586	0	2058	0	1
RVBD1818c:PE-PGRS33	6	NonEssential	2	1403	-4.2165	0.452057	1403	0	1660	0	1
RVBD1819c:bacA	32	NonEssential	14	2098	-4.9047	0.748652	2098	0	1804	0	1
RVBD1820:ilvG	12	NonEssential	7	2742	-5.7651	0.896109	2742	0	3292	0	1
RVBD1821:secA2	10	NonEssential	8	266	-6.243	0.09435	266	0	3151	0	1
RVBD1822:pgsA2	111	Essential	68	91	-6.0519	0.002658	91	1	2993	-2.2931	1
RVBD1823:RVBD1823	6	NonEssential	5	1711	-3.4583	0.562094	1711	0	705	0	1
RVBD1824:RVBD1824	5	NonEssential	5	695	-6.5303	0.223642	695	0	3772	0	1
RVBD1825:RVBD1825	8	NonEssential	6	489	-5.7005	0.173982	489	0	3588	0	1
RVBD1826:gcvH	22	Essential	10	2892	-5.4741	0.960725	2892	0	1223	0	1
RVBD1827:garA	68	Essential	53	35	-6.2171	7e-05	35	1	1310	-1.7817	1
RVBD1828:RVBD1828	109	Essential	98	5	-6.8712	7e-05	5	1	2759	-2.1773	1
RVBD1829:RVBD1829	7	NonEssential	6	391	-4.8251	0.136125	391	0	3439	0	1
RVBD1830:RVBD1830	69	Essential	18	3528	-5.3514	1	3528	20	11	-1.6642	0.000198
RVBD1831:RVBD1831	8	Essential	0	3984	-4.6932	1	3984	1	473	-2.2931	1
RVBD1832:gcvB	245	Essential	114	3261	-5.1874	1	3261	4	1279	-1.9415	1
RVBD1833c:RVBD1833c	12	NonEssential	6	675	-5.2439	0.256016	675	0	1404	0	1
RVBD1834:lipZ	9	NonEssential	2	3115	-5.4694	0.971558	3115	0	756	0	1
RVBD1835c:RVBD1835c	12	NonEssential	8	748	-5.8005	0.285039	748	0	2536	0	1
RVBD1836c:RVBD1836c	15	NonEssential	12	117	-6.8284	0.011889	117	0	3922	0	1
RVBD1837c:glcB	236	Essential	137	225	-5.5542	0.079188	225	5	654	-1.6165	1
RVBD1838c:vapC13	8	NonEssential	7	264	-5.0773	0.088761	264	0	3567	0	1
RVBD1839c:vapB13	5	NonEssential	4	1885	-5.9042	0.583206	1885	0	1308	0	1
RVBD1840c:PE-PGRS34	6	NonEssential	5	1784	-5.726	0.587211	1784	0	2768	0	1
RVBD1841c:RVBD1841c	8	NonEssential	5	1979	-4.9435	0.660131	1979	0	2268	0	1
RVBD1842c:RVBD1842c	11	NonEssential	7	1890	-5.3911	0.641524	1890	0	3577	0	1
RVBD1843c:guaB1	8	NonEssential	6	1185	-5.2546	0.434497	1185	0	3204	0	1
RVBD1844c:gnd1	9	NonEssential	5	2913	-4.3677	0.915918	2913	0	882	0	1
RVBD1845c:blaR	7	Essential	7	94	-7.6116	0.002206	94	0	4030	0	1
RVBD1846c:RVBD1846c	4	NonEssential	4	1075	-5.894	0.34834	1075	0	3522	0	1
RVBD1848:ureA	5	NonEssential	3	1564	-5.4355	0.480586	1564	0	1532	0	1
RVBD1849:ureB	5	NonEssential	3	2897	-5.6371	0.865458	2897	0	1291	0	1
RVBD1850:ureC	6	NonEssential	6	578	-6.393	0.211415	578	0	3827	0	1
RVBD1851:ureF	7	NonEssential	5	1386	-4.2144	0.47204	1386	0	1638	0	1
RVBD1852:ureG	6	NonEssential	5	1234	-5.9	0.421456	1234	0	859	0	1
RVBD1853:ureD	6	NonEssential	5	339	-5.8607	0.102751	339	0	3712	0	1
RVBD1854c:ndh	109	Essential	39	2353	-5.2127	0.807145	2353	1	1323	-1.5642	1
RVBD1855c:RVBD1855c	11	NonEssential	9	517	-4.7292	0.197076	517	0	3340	0	1
RVBD1856c:RVBD1856c	5	NonEssential	4	2265	-5.6442	0.71303	2265	0	2729	0	1
RVBD1857:modA	9	NonEssential	6	1219	-6.1261	0.44395	1219	0	2191	0	1
RVBD1858:modB	8	NonEssential	8	209	-5.1241	0.052973	209	0	4003	0	1
RVBD1859:modC	6	NonEssential	5	803	-4.4014	0.282675	803	0	2926	0	1
RVBD1860:apa	9	NonEssential	8	201	-6.5701	0.050071	201	0	3746	0	1
RVBD1861:RVBD1861	6	NonEssential	3	2426	-5.4084	0.749986	2426	0	461	0	1
RVBD1862:adhA	5	NonEssential	3	3027	-4.9965	0.901951	3027	0	2264	0	1
RVBD1863c:RVBD1863c	5	NonEssential	3	3191	-4.0734	0.951592	3191	0	1371	0	1
RVBD1864c:RVBD1864c	6	NonEssential	2	1745	-5.5362	0.57336	1745	0	3407	0	1
RVBD1865c:RVBD1865c	6	NonEssential	3	2540	-3.1726	0.777436	2540	0	867	0	1
RVBD1866:RVBD1866	21	NonEssential	15	1009	-5.6813	0.392199	1009	1	934	-2.2931	1
RVBD1867:RVBD1867	6	NonEssential	3	1954	-4.3084	0.633051	1954	0	1760	0	1
RVBD1868:RVBD1868	14	NonEssential	10	1213	-5.6418	0.446651	1213	0	1164	0	1
RVBD1869c:RVBD1869c	8	NonEssential	7	387	-6.6184	0.142232	387	0	3875	0	1
RVBD1870c:RVBD1870c	5	NonEssential	5	334	-7.2404	0.093284	334	0	3666	0	1
RVBD1871c:RVBD1871c	5	NonEssential	3	2549	-5.594	0.768234	2549	0	985	0	1
RVBD1872c:lldD2	8	NonEssential	6	666	-5.9714	0.234881	666	0	3623	0	1
RVBD1873:RVBD1873	7	NonEssential	6	454	-4.924	0.163474	454	0	3017	0	1
RVBD1874:RVBD1874	10	NonEssential	7	1295	-5.7218	0.474428	1295	1	177	-1.3266	1
RVBD1875:RVBD1875	6	NonEssential	3	1031	-4.3112	0.358726	1031	0	725	0	1
RVBD1876:bfrA	6	NonEssential	3	2525	-4.5064	0.76961	2525	0	1855	0	1
RVBD1877:RVBD1877	22	NonEssential	12	2562	-5.4825	0.865458	2562	0	3401	0	1
RVBD1878:glnA3	16	NonEssential	9	1995	-4.9159	0.69149	1995	0	2674	0	1
RVBD1879:RVBD1879	13	NonEssential	8	2081	-5.2503	0.695748	2081	0	3576	0	1
RVBD1880c:cyp140	11	NonEssential	2	1904	-4.4736	0.645802	1904	0	1078	0	1
RVBD1881c:lppE	9	NonEssential	6	1701	-5.2987	0.585039	1701	0	3529	0	1
RVBD1882c:RVBD1882c	9	NonEssential	3	3640	-5.2697	1	3640	0	2957	0	1
RVBD1883c:RVBD1883c	5	NonEssential	5	682	-5.8656	0.21977	682	0	3777	0	1
RVBD1884c:rpfC	7	NonEssential	6	520	-4.7354	0.189302	520	0	2720	0	1
RVBD1885c:RVBD1885c	6	NonEssential	4	1660	-5.4095	0.538597	1660	0	3138	0	1
RVBD1886c:fbpB	9	NonEssential	5	3004	-4.567	0.938584	3004	0	2846	0	1
RVBD1887:RVBD1887	7	NonEssential	7	371	-6.1975	0.127375	371	0	3929	0	1
RVBD1888A:RVBD1888A	5	NonEssential	3	3017	-5.7848	0.900368	3017	0	1533	0	1
RVBD1888c:RVBD1888c	18	NonEssential	8	1958	-5.1937	0.69149	1958	0	2627	0	1
RVBD1889c:RVBD1889c	7	NonEssential	3	2032	-5.3295	0.656061	2032	0	2040	0	1
RVBD1890c:RVBD1890c	6	NonEssential	4	2629	-5.676	0.804409	2629	0	3408	0	1
RVBD1891:RVBD1891	11	NonEssential	5	2161	-5.0656	0.71303	2161	0	2663	0	1
RVBD1892:RVBD1892	7	NonEssential	4	2496	-4.5152	0.792083	2496	0	2383	0	1
RVBD1893:RVBD1893	1	NonEssential	0	3302	-5.4833	0.867179	3302	0	1165	0	1
RVBD1894c:RVBD1894c	9	NonEssential	4	2667	-5.5217	0.85839	2667	0	1566	0	1
RVBD1895:RVBD1895	12	NonEssential	7	2378	-4.8761	0.786317	2378	0	3634	0	1
RVBD1896c:RVBD1896c	8	NonEssential	6	1223	-3.8562	0.437083	1223	0	1106	0	1
RVBD1897c:RVBD1897c	6	NonEssential	6	242	-4.8308	0.063032	242	0	3934	0	1
RVBD1898:RVBD1898	5	NonEssential	3	2495	-5.095	0.749986	2495	0	2003	0	1
RVBD1899c:lppD	5	NonEssential	2	3074	-5.4105	0.91625	3074	0	1791	0	1
RVBD1900c:lipJ	10	NonEssential	9	273	-6.1292	0.097805	273	0	1954	0	1
RVBD1901:cinA	14	NonEssential	4	3833	-5.1744	1	3833	0	1879	0	1
RVBD1902c:nanT	20	NonEssential	13	1466	-5.1229	0.538597	1466	0	3806	0	1
RVBD1903:RVBD1903	8	NonEssential	8	212	-6.3668	0.056185	212	0	3977	0	1
RVBD1904:RVBD1904	4	NonEssential	3	2412	-5.8596	0.711627	2412	0	1907	0	1
RVBD1905c:aao	6	NonEssential	4	2839	-5.6191	0.876811	2839	0	3598	0	1
RVBD1906c:RVBD1906c	6	NonEssential	1	3822	-5.3714	1	3822	0	520	0	1
RVBD1907c:RVBD1907c	6	NonEssential	3	3322	-5.58	0.989048	3322	0	2795	0	1
RVBD1908c:katG	12	NonEssential	11	84	-6.3688	0.000433	84	0	2162	0	1
RVBD1909c:furA	6	NonEssential	5	115	-6.8338	0.005799	115	0	3446	0	1
RVBD1910c:RVBD1910c	5	NonEssential	3	1482	-6.6022	0.468249	1482	0	1718	0	1
RVBD1911c:lppC	6	NonEssential	2	2289	-4.9548	0.716781	2289	0	1396	0	1
RVBD1912c:fadB5	10	NonEssential	8	686	-5.0631	0.251907	686	1	436	-2.0354	1
RVBD1913:RVBD1913	7	NonEssential	5	2275	-5.2938	0.736891	2275	0	2929	0	1
RVBD1914c:RVBD1914c	7	NonEssential	5	1839	-5.1498	0.594035	1839	0	589	0	1
RVBD1915:aceAa	11	NonEssential	8	569	-4.7981	0.21977	569	0	3478	0	1
RVBD1916:aceAb	10	NonEssential	6	272	-5.2314	0.097805	272	0	3572	0	1
RVBD1917c:PPE34	41	NonEssential	21	2958	-5.4471	0.987339	2958	1	1355	-2.142	1
RVBD1918c:PPE35	20	NonEssential	8	3521	-5.4105	1	3521	0	2196	0	1
RVBD1919c:RVBD1919c	5	NonEssential	3	2599	-5.3313	0.783651	2599	0	2777	0	1
RVBD1920:RVBD1920	5	NonEssential	3	2650	-5.0824	0.794745	2650	0	1869	0	1
RVBD1921c:lppF	13	NonEssential	6	3249	-5.6075	1	3249	0	2781	0	1
RVBD1922:RVBD1922	7	NonEssential	3	2491	-4.9617	0.791391	2491	0	2552	0	1
RVBD1923:lipD	13	NonEssential	7	3070	-4.7177	0.979552	3070	0	3002	0	1
RVBD1924c:RVBD1924c	5	NonEssential	3	2908	-4.4168	0.867468	2908	0	952	0	1
RVBD1925:fadD31	11	NonEssential	10	213	-5.9953	0.061624	213	1	372	-1.8411	1
RVBD1926c:mpt63	5	NonEssential	4	1725	-6.0198	0.538597	1725	0	1549	0	1
RVBD1927:RVBD1927	6	NonEssential	5	822	-5.0568	0.298803	822	0	3275	0	1
RVBD1928c:RVBD1928c	12	NonEssential	6	1695	-5.6159	0.594035	1695	0	1220	0	1
RVBD1929c:RVBD1929c	12	NonEssential	8	1232	-6.0967	0.455769	1232	0	821	0	1
RVBD1930c:RVBD1930c	5	NonEssential	2	2851	-5.3687	0.849471	2851	0	2246	0	1
RVBD1931c:RVBD1931c	6	NonEssential	3	2048	-5.0511	0.660022	2048	0	2012	0	1
RVBD1932:tpx	6	NonEssential	3	3162	-5.5321	0.945527	3162	0	1695	0	1
RVBD1933c:fadE18	13	NonEssential	6	2696	-5.0358	0.894744	2696	0	791	0	1
RVBD1934c:fadE17	16	NonEssential	10	1090	-5.6625	0.418255	1090	1	800	-2.3169	1
RVBD1935c:echA13	8	NonEssential	4	2110	-5.6517	0.69629	2110	0	1709	0	1
RVBD1936:RVBD1936	9	NonEssential	6	1692	-4.8959	0.585039	1692	0	1796	0	1
RVBD1937:RVBD1937	24	NonEssential	11	1671	-5.5363	0.61991	1671	0	1978	0	1
RVBD1938:ephB	13	NonEssential	7	1041	-4.8979	0.391669	1041	0	1727	0	1
RVBD1939:RVBD1939	6	NonEssential	3	1567	-5.2804	0.497125	1567	0	1196	0	1
RVBD1940:ribA1	7	NonEssential	5	1980	-5.7466	0.639545	1980	0	2334	0	1
RVBD1941:RVBD1941	5	NonEssential	2	2996	-5.5646	0.895926	2996	0	2302	0	1
RVBD1942c:mazF5	7	NonEssential	3	3301	-5.3571	0.991167	3301	0	3199	0	1
RVBD1944c:RVBD1944c	6	NonEssential	3	3100	-5.5265	0.935607	3100	0	2399	0	1
RVBD1945:RVBD1945	3	NonEssential	3	1557	-4.2008	0.46571	1557	0	3146	0	1
RVBD1946c:lppG	9	NonEssential	4	3297	-4.7756	1	3297	0	2388	0	1
RVBD1947:RVBD1947	5	NonEssential	2	3650	-5.5545	1	3650	0	2766	0	1
RVBD1948c:RVBD1948c	6	NonEssential	4	1224	-5.309	0.421268	1224	0	1630	0	1
RVBD1949c:RVBD1949c	9	NonEssential	6	965	-5.6007	0.349249	965	0	2227	0	1
RVBD1950c:RVBD1950c	5	NonEssential	1	3481	-4.2697	1	3481	0	772	0	1
RVBD1951c:RVBD1951c	6	NonEssential	2	1929	-5.2068	0.628923	1929	0	1382	0	1
RVBD1952:vapB14	7	NonEssential	4	2635	-5.6387	0.828878	2635	1	297	-1.9031	1
RVBD1953:vapC14	6	NonEssential	2	2407	-5.2258	0.748652	2407	1	416	-2.3597	1
RVBD1954A:RVBD1954A	5	NonEssential	4	1128	-6.2061	0.378281	1128	0	1335	0	1
RVBD1954c:RVBD1954c	8	NonEssential	5	2293	-5.8789	0.744541	2293	0	2117	0	1
RVBD1955:higB	10	NonEssential	7	1375	-5.7118	0.495705	1375	0	2400	0	1
RVBD1956:higA	8	NonEssential	2	3437	-4.1387	1	3437	1	301	-1.7817	1
RVBD1957:RVBD1957	5	NonEssential	2	3373	-4.2184	0.987076	3373	0	1505	0	1
RVBD1958c:RVBD1958c	7	NonEssential	5	1517	-6.0198	0.507339	1517	0	1389	0	1
RVBD1959c:parE1	6	NonEssential	5	659	-6.3809	0.233939	659	0	3599	0	1
RVBD1960c:RVBD1960c	5	NonEssential	2	3599	-4.7177	1	3599	0	2181	0	1
RVBD1961:RVBD1961	5	NonEssential	3	2168	-4.543	0.683683	2168	0	1425	0	1
RVBD1962A:vapB35	5	NonEssential	2	2928	-5.255	0.872886	2928	0	2431	0	1
RVBD1962c:RVBD1962c	4	NonEssential	3	2263	-5.5161	0.672504	2263	0	2443	0	1
RVBD1963c:mce3R	12	NonEssential	2	3941	-4.8209	1	3941	0	787	0	1
RVBD1964:yrbE3A	8	NonEssential	6	1889	-5.6144	0.614729	1889	0	2554	0	1
RVBD1965:yrbE3B	10	NonEssential	7	1898	-5.7296	0.631539	1898	0	3725	0	1
RVBD1966:mce3A	10	NonEssential	7	2061	-5.0498	0.68443	2061	0	2878	0	1
RVBD1967:mce3B	7	NonEssential	4	1789	-4.7524	0.578716	1789	0	864	0	1
RVBD1968:mce3C	9	NonEssential	7	732	-4.2174	0.267777	732	0	2442	0	1
RVBD1969:mce3D	8	NonEssential	5	2078	-5.1682	0.689412	2078	0	3004	0	1
RVBD1970:lprM	5	NonEssential	3	2939	-5.2743	0.875723	2939	0	2828	0	1
RVBD1971:mce3F	11	NonEssential	7	894	-5.3271	0.338072	894	0	3233	0	1
[truncated: 2,055 more rows]
