# Supplementary material for: Cyclic AMP is a critical mediator of intrinsic drug resistance and fatty acid metabolism in M. tuberculosis
Source: eLife journal article supplement (doi:10.7554/elife.81177), 2023-02-22
Supplement: supp [file elife-81177-supp-v1.zip]

| Antibiotic | NT    |       |       | <i>rv</i> 3645 KD + <i>rv</i> 3645 <sup>CS</sup> |       |       | <i>rv</i> 3645 KD + <i>rv</i> 3645 <sup>CR</sup> |       |       |
|------------|-------|-------|-------|--------------------------------------------------|-------|-------|--------------------------------------------------|-------|-------|
| Vancomycin | 46.37 | 49.21 | 58.65 | 59.11                                            | 53.24 | 53.26 | 38.77                                            | 50.16 | 46.99 |
| Linezolid  | 3.19  | 7.4   | 3.03  | 1.11                                             | 16.86 | 10.82 | 5.45                                             | 16.43 | 3.15  |
