# Supplementary material for: Cyclic AMP is a critical mediator of intrinsic drug resistance and fatty acid metabolism in M. tuberculosis
Source: eLife journal article supplement (doi:10.7554/elife.81177), 2023-02-22
Supplement: supp [file elife-81177-supp-v1.zip]

| Antibiotic     | Low   | Med   | High  |
|----------------|-------|-------|-------|
| Vancomycin     | 252   | 505   | 1010  |
| Clarithromycin | 13370 | 26740 | 53480 |
| Rifampicin     | 0.8   | 1.5   | 3     |
| Bedaquiline    | 45    | 90    | 180   |
| Ethambutol     | 902   | 1804  | 3607  |
| Levofloxacin   | 138   | 277   | 536   |
| Streptomycin   | 110   | 221   | 441   |
| Isoniazid      | 182   | 365   | 730   |
| Linezolid      | 371   | 741   | 1482  |
