# Supplementary material for: Cyclic AMP is a critical mediator of intrinsic drug resistance and fatty acid metabolism in M. tuberculosis
Source: eLife. 2023 Feb 22;12:e81177. doi: 10.7554/eLife.81177 (PMC9995111; doi:10.7554/eLife.81177)
Supplement: Supplementary file 1. [file elife-81177-supp1.xlsx]

## Sheet: Legends
Supplementary Table 1: List of plasmids, sgRNAs, and primers used in this work
Plasmids (tab 2)
Column Name	Column description
Fig. used	Figures in the paper where strains constructed with the plasmid were used
Plasmid Name	Name of the plasmid
Plasmid genotype	Genotype description of the plasmid
Plasmid description	Usage and purpose of the plasmid
Plasmid Map	URL to an annotated sequence map of the plasmid
Resistance marker	Antibiotic selection marker associated with the plasmid
sgRNAs (tab 3)
Column Name	Column description
Fig. used	Figures in the paper where the sgRNA was used
sgRNA ID	Unique identifier of the sgRNA
Gene targeted	Unique gene ID targeted by the sgRNA
Gene name	Gene name if available from EPFL Mycobrowser (https://mycobrowser.epfl.ch/)
sgRNA targeting sequence (5'–3')	Nucleotide sequence of the sgRNA targeting region
PAM (5'-3')	PAM associated with the sgRNA targeting sequence
Primers (tab 4)
Column Name	Column description
Fig. used	Figures in the paper where constructs made with the primer were used
Primer Name	Name of the primer
Sequence (5'-3')	Nucleotide sequence of the primer
Description	Usage of the primer

## Sheet: Plasmids
Fig. used	Plasmid Name	Plasmid genotype	Plasmid description	Plasmid Map	Resistance marker
1, 2, 3, 4, 5, 1.1, 2.1, 2.2, 3.1,5.6	plRL58	Ptet(gB73)-Sth1 dCas9 Ptet(gB52)-Sth1 sgRNA P(gB37)-TetRCO(tetON) L5 attP only v1::KanR	Sth1 dCas9 CRISPRi plasmid optimized for use in M. tuberculosis. Sth1 dCas9 and the sgRNA are induced in the presence of ATc. This plasmid lacks the full L5 integrase and must be co-transformed plRL19	https://benchling.com/s/seq-Gv9EfPn1vM7OMu6HPyU3	Kanamycin
1, 2, 3, 4, 5, 1.1, 2.1, 2.2, 3.1	plRL60	pDE43-MCZtq26 Tweety attP::ZeoR (empty vector)	Tweety::ZeoR integration backbone. Contains the Tweety int with a zeocin resistance cassette.	https://benchling.com/s/seq-s6M31jHfAUSXmCl90JQc	Chloramphenicol/Zeocin
1, 2, 3, 1.1, 2.1, 2.2, 3.1	plAW326	plRL60 Phsp60-rv3645 Tweety attP::ZeoR	WT allele of the rv3645 ORF under the expression of the hsp60 promoter. Cloned by Gibson assembly into EcoRV and BstZ17I-digested plRL60.	https://benchling.com/s/seq-JGIqgUNmAMJD3kAx7L3a	Chloramphenicol/Zeocin
1, 2, 3, 1.1, 2.1, 2.2, 3.1	plAW328	plRL60 Phsp60-rv3645CR (1170C>T 1173C>T 1179G>T) Tweety attP::ZeoR	CRISPRi-resistant allele of the rv3645 ORF under the expression of the hsp60 promoter. Cloned by Gibson assembly into EcoRV and BstZ17I-digested plRL60.	https://benchling.com/s/seq-78c9UA3mHPK6wm67x281	Chloramphenicol/Zeocin
3, 4, 5, 3.1, 3.2, 5.2, 5.3, 5.4, 5.5, 5.7	pNitET-SacB-kan	Che9 phage RecET; PNit2-NitR; SacRB; KanR	Expression of the phage Che9c RecET system for Recombineering in mycobacteria	https://www.addgene.org/107692/	Kanamycin
3, 4, 5, 3.1, 3.2, 5.2, 5.3, 5.5, 5.7	pDE43-MCK	L5::KanR (empty vector)	L5::KanR integration backbone. Contains the L5 int with a kanamycin resistance cassette.	https://benchling.com/s/seq-kMn75zIzBZrgywIJuKYU	Kanamycin
3, 4, 5, 3.1, 3.2, 5.2, 5.3, 5.4, 5.5, 5.7	pMCK-Phsp60-rv3645	Phsp60-rv3645; L5::KanR	This plasmid integrates in Mtb chromosome at the att-L5 site; rv3645 is expressed from the constitutive promoter Phsp60.	https://benchling.com/s/seq-p6Hz6PMBoX3BYJJY4V1w	Kanamycin
5	plAW366	plRL60 Phsp60-rv3645CR (D411A) Tweety::ZeoR	D411A mutant of the CRISPRi-resistant allele of rv3645 under the expression of the hsp60 promoter. Cloned by Gibson assembly into EcoRV and BstZ17I-digested plRL60.	https://benchling.com/s/seq-chRm8o8o8D95XUz05Zk0	Chloramphenicol/Zeocin
5.1	plAW416	plRL60 Phsp60-rv3645CR-6xHis Tweety::ZeoR	C-terminally 6xHis-tagged CRISPRi-resistant allele of rv3645 under the expression of the hsp60 promoter. Cloned by Gibson assembly into EcoRV and BstZ17I-digested plRL60.	https://benchling.com/s/seq-oBH38BxkmWrpVCnzcVW4	Chloramphenicol/Zeocin
5.1	plAW424	plRL60 Phsp60-rv3645CR (D411A)-6xHis Tweety::ZeoR	C-terminally 6xHis-tagged D411A mutant of the CRISPRi-resistant allele of rv3645 under the expression of the hsp60 promoter. Cloned by Gibson assembly into EcoRV and BstZ17I-digested plRL60.	https://benchling.com/s/seq-egzsKYpbMilIywnHOMkK	Chloramphenicol/Zeocin
5, 5.6	plAW388	Phsp60-empty Giles attP only::HygR	Giles::HygR integration backbone. This plasmid lacks the full Giles integrase and must be co-transformed with plRL40.	https://benchling.com/s/seq-kKKtxI4MJcG3XIY0PwtU	Hygromycin
5, 3.2, 5.2, 5.3, 5.5, 5,6	plAW376	plAW388 Phsp60-rv1339 Giles attP only::HygR	The rv1339 ORF was cloned under the expression of the hsp60 promoter. Cloned by Gibson assembly into NcoI and ClaI-digested plAW388.	https://benchling.com/s/seq-bSt8sXBZYWjAwNuBb1kd	Hygromycin
5, 3.2, 5.3, 5.5, 5.6	plAW389	plAW388 Phsp60-rv1339(D180A) Giles attP only::HygR	D180A mutant of rv1339 under the expression of the hsp60 promoter. Cloned by Gibson assembly into NcoI and ClaI-digested plAW388.	https://benchling.com/s/seq-R4evubzNFUI9tvob7HTS	Hygromycin
1, 2, 3, 4, 5, 1.1, 2.1, 2.2, 3.1, 5.6	plRL19	Pmop-L5 Int AmpR (suicide plasmid)	The L5 phage Int protein is expressed from the mycobacterial optimized promoter (MOP). This backbone is non-replicating and non-integrating in mycobacteria.	https://benchling.com/s/seq-BAF0JelwBQN6D2dw5alf	Ampicillin
1, 2, 3, 4, 5, 1.1, 2.1, 2.2, 3.1	plRL62	pGA-OXP15-intTw (suicide plasmid)	The Tweety phage Int protein is expressed from the UV15 promoter. This backbone is non-replicating and non-integrating in mycobacteria.	https://benchling.com/s/seq-LtN3e9WbixCmPd0VOCAa	Ampicillin
5, 3.2, 5.2, 5.3, 5.5, 5.6	plRL40	Puv15-Giles Int (suicide plasmid)	The Giles phage Int protein is expressed from the UV15 promoter. This backbone is non-replicating and non-integrating in mycobacteria.	https://benchling.com/s/seq-2PVXvHq0CfNPVacwz1Ku	Ampicillin

## Sheet: sgRNAs
Fig. used	sgRNA ID	Gene targeted	Gene name	sgRNA targeting sequence (5'–3')	PAM (5'-3')
1, 2, 4, 5, 1.1, 2.1, 2.2, 3.1	Non-Targeting control	NA	NA	GGAGACGATTAATGCGTCTCG	NA
1, 2, 1.1, 2.1, 2.2, 3.1	rv3645	rv3645	macE	GGCGACGGTTTCGACCACCAC	CCGGAAG
2	mtrA	rv3246c	mtrA	GGTGAGCATCACGATCGGAACA	CCGGAAT
2	ccdA	rv0527	ccdA	ATCAGCACGCCTCCGACCCGCT	GCAGCAG
2	mmpL3	rv0206c	mmpL3	AACATCCGCACCACGGTCGCGT	CCAGCAG
2	embB	rv3795	embB	GACAGCGAACCGTCGACGGTGG	GCAGGAT
2	ripA	rv1477	ripA	GCTGCAGGTTGGCCATCACCGCT	TGGGAAC
2	kasA	rv2245	kasA	ATGTCGTGCTTCAGTAACGCCCG	AAGGCAA
4, 5	rv1339	rv1339	rv1339	AATCCGGCCCCACGACGCTACC	GGAGCAT

## Sheet: Primers
Fig. used	Primer Name	Sequence (5'-3')	Description
1, 2, 3, 1.1, 2.1, 2.2, 3.1, 5.1	olAW0887	CCTCTAGGGTCCCCAGCTGGACGCGCCCGCTTTGATCG	Phsp60 amplification Fwd primer, Gibson handles to plRL60
1, 2, 3, 1.1, 2.1, 2.2, 3.1, 5.1	olAW0882	CGGCATCCATAGAGAGTCCTCCTGTCGACG	Phsp60 amplification Rev primer, Gibson handles to rv3645
1, 2, 3, 1.1, 2.1, 2.2, 3.1, 5.1	olAW0883	AGGACTCTCTATGGATGCCGAGGCGTTC	rv3645 amplification Fwd primer, Gibson handles to Phsp60
1, 2, 3, 1.1, 2.1, 2.2, 3.1, 5.1	olAW0885	AGAATATATACTGATATGTACTAGCCGCGTACTTCGCTG	rv3645 amplification Rev primer, Gibson handles to plRL60
1, 2, 3, 1.1, 2.1, 2.2, 3.1	olAW0774	GTCCAGCTGCTCAACGAGTTTTTTCGGGTCGTGGTCGAAACCGTCGCCCG	Fwd site-directed mutagenesis primer to generate rv3645 silent CRISPRi resistant mutation
1, 2, 3, 1.1, 2.1, 2.2, 3.1	olAW0775	CGGGCGACGGTTTCGACCACGACCCGAAAAAACTCGTTGAGCAGCTGGAC	Rev site-directed mutagenesis primer to generate rv3645 silent CRISPRi resistant mutation
3, 4, 5, 3.1, 3.2, 5.2, 5.3, 5.4, 5.5, 5.7	Rv3645_2R_F	GGGGACAGCTTTCTTGTACAAAGTGGCTGCGGCCGCTAGGAGGTCCGCTATGGATGCCGAGGCGTTC	Forward primer to clone rv3645 into the gateway cloning donor plasmid pDO23A
3, 4, 5, 3.1, 3.2, 5.2, 5.3, 5.4, 5.5, 5.7	Rv3645_3_R	GGGGACAACTTTGTATAATAAAGTTGCTAGCCGCGTACTTCGCTGGAA	Reverse primer to clone rv3645 into the gateway cloning donor plasmid pDO23A
4	Sth1F-NGS-Fwd-v3-1	AATGATACGGCGACCACCGAGATCTACACAGCGCTAGACACTCTTTCCCTACACGACGCTCTTCCGATCTTGTAGCTTCTTTCGAGTACAAAAAC	Deep sequencing primer to amplify and index CRISPRi libraries for Illumina sequencing
4	Sth1F-NGS-Fwd-v3-2	AATGATACGGCGACCACCGAGATCTACACGATATCGAACACTCTTTCCCTACACGACGCTCTTCCGATCTACTGTAGCTTCTTTCGAGTACAAAAAC	Deep sequencing primer to amplify and index CRISPRi libraries for Illumina sequencing
4	Sth1F-NGS-Fwd-v3-3	AATGATACGGCGACCACCGAGATCTACACCGCAGACGACACTCTTTCCCTACACGACGCTCTTCCGATCTGTACTGTAGCTTCTTTCGAGTACAAAAAC	Deep sequencing primer to amplify and index CRISPRi libraries for Illumina sequencing
4	Sth1F-NGS-Fwd-v3-4	AATGATACGGCGACCACCGAGATCTACACTATGAGTAACACTCTTTCCCTACACGACGCTCTTCCGATCTCAGTAGTGTAGCTTCTTTCGAGTACAAAAAC	Deep sequencing primer to amplify and index CRISPRi libraries for Illumina sequencing
4	Sth1F-NGS-Fwd-v3-5	AATGATACGGCGACCACCGAGATCTACACAGGTGCGTACACTCTTTCCCTACACGACGCTCTTCCGATCTTGCAGCATTGTAGCTTCTTTCGAGTACAAAAAC	Deep sequencing primer to amplify and index CRISPRi libraries for Illumina sequencing
4	Sth1F-NGS-Fwd-v3-11	AATGATACGGCGACCACCGAGATCTACACCGCGGTTCACACTCTTTCCCTACACGACGCTCTTCCGATCTTGTAGCTTCTTTCGAGTACAAAAAC	Deep sequencing primer to amplify and index CRISPRi libraries for Illumina sequencing
4	Sth1F-NGS-Fwd-v3-12	AATGATACGGCGACCACCGAGATCTACACTATAACCTACACTCTTTCCCTACACGACGCTCTTCCGATCTACTGTAGCTTCTTTCGAGTACAAAAAC	Deep sequencing primer to amplify and index CRISPRi libraries for Illumina sequencing
4	Sth1F-NGS-Fwd-v3-13	AATGATACGGCGACCACCGAGATCTACACAAGGATGAACACTCTTTCCCTACACGACGCTCTTCCGATCTGTACTGTAGCTTCTTTCGAGTACAAAAAC	Deep sequencing primer to amplify and index CRISPRi libraries for Illumina sequencing
4	Sth1F-NGS-Fwd-v3-14	AATGATACGGCGACCACCGAGATCTACACGGAAGCAGACACTCTTTCCCTACACGACGCTCTTCCGATCTCAGTAGTGTAGCTTCTTTCGAGTACAAAAAC	Deep sequencing primer to amplify and index CRISPRi libraries for Illumina sequencing
4	Sth1F-NGS-Fwd-v3-15	AATGATACGGCGACCACCGAGATCTACACTCGTGACCACACTCTTTCCCTACACGACGCTCTTCCGATCTTGCAGCATTGTAGCTTCTTTCGAGTACAAAAAC	Deep sequencing primer to amplify and index CRISPRi libraries for Illumina sequencing
4	Sth1F-NGS-Rev-v2-1	CAAGCAGAAGACGGCATACGAGATAACCGCGGGTGACTGGAGTTCAGACGTGTGCTCTTCCGATCTTGACCTGGGGATTTGCGA	Deep sequencing primer to amplify and index CRISPRi libraries for Illumina sequencing
4	Sth1F-NGS-Rev-v2-2	CAAGCAGAAGACGGCATACGAGATGGTTATAAGTGACTGGAGTTCAGACGTGTGCTCTTCCGATCTTGACCTGGGGATTTGCGA	Deep sequencing primer to amplify and index CRISPRi libraries for Illumina sequencing
4	Sth1F-NGS-Rev-v2-3	CAAGCAGAAGACGGCATACGAGATCCAAGTCCGTGACTGGAGTTCAGACGTGTGCTCTTCCGATCTTGACCTGGGGATTTGCGA	Deep sequencing primer to amplify and index CRISPRi libraries for Illumina sequencing
4	Sth1F-NGS-Rev-v2-4	CAAGCAGAAGACGGCATACGAGATTTGGACTTGTGACTGGAGTTCAGACGTGTGCTCTTCCGATCTTGACCTGGGGATTTGCGA	Deep sequencing primer to amplify and index CRISPRi libraries for Illumina sequencing
4	Sth1F-NGS-Rev-v2-5	CAAGCAGAAGACGGCATACGAGATCAGTGGATGTGACTGGAGTTCAGACGTGTGCTCTTCCGATCTTGACCTGGGGATTTGCGA	Deep sequencing primer to amplify and index CRISPRi libraries for Illumina sequencing
4	Sth1F-NGS-Rev-v2-11	CAAGCAGAAGACGGCATACGAGATAGTAGAGAGTGACTGGAGTTCAGACGTGTGCTCTTCCGATCTTGACCTGGGGATTTGCGA	Deep sequencing primer to amplify and index CRISPRi libraries for Illumina sequencing
4	Sth1F-NGS-Rev-v2-12	CAAGCAGAAGACGGCATACGAGATGACGAGAGGTGACTGGAGTTCAGACGTGTGCTCTTCCGATCTTGACCTGGGGATTTGCGA	Deep sequencing primer to amplify and index CRISPRi libraries for Illumina sequencing
4	Sth1F-NGS-Rev-v2-13	CAAGCAGAAGACGGCATACGAGATAGACTTGGGTGACTGGAGTTCAGACGTGTGCTCTTCCGATCTTGACCTGGGGATTTGCGA	Deep sequencing primer to amplify and index CRISPRi libraries for Illumina sequencing
4	Sth1F-NGS-Rev-v2-14	CAAGCAGAAGACGGCATACGAGATGAGTCCAAGTGACTGGAGTTCAGACGTGTGCTCTTCCGATCTTGACCTGGGGATTTGCGA	Deep sequencing primer to amplify and index CRISPRi libraries for Illumina sequencing
4	Sth1F-NGS-Rev-v2-15	CAAGCAGAAGACGGCATACGAGATCTTAAGCCGTGACTGGAGTTCAGACGTGTGCTCTTCCGATCTTGACCTGGGGATTTGCGA	Deep sequencing primer to amplify and index CRISPRi libraries for Illumina sequencing
5, 5.1	olAW0778	CGTCAACAAGTTCCAAGGCGCCGCCGCGCTGGCCATCTTCG	Fwd site-directed mutagenesis primer to generate rv3645 (D411A) mutation
5, 5.1	olAW0779	CGAAGATGGCCAGCGCGGCGGCGCCTTGGAACTTGTTGACG	Rev site-directed mutagenesis primer to generate rv3645 (D411A) mutation
5, 3.2, 5.2, 5.3, 5.5, 5.6	olAW1013	GCTGCAGGAATTCGAATGGCCATGGAGGAGGCACCGAATGCGTCGATGTATTCCG	rv1339 amplifying Fwd primer with Gibson handles to plAW388
5, 3.2, 5.2, 5.3, 5.5, 5.6	olAW1014	CTAGTTAACTACGTCGACATCGATCTAGCCGGCTCGCCGGAC	rv1339 amplifying Rev primer with Gibson handles to plAW388
5, 3.2, 5.3, 5.6	olAW1051	GTCACTGGCTTATAGCGGCGCCACCGGCATTTGTGACCAGC	Fwd site-directed mutagenesis primer to generate rv1339 (D180A) catalytic mutant
5, 3.2, 5.3, 5.6	olAW1052	GCTGGTCACAAATGCCGGTGGCGCCGCTATAAGCCAGTGAC	Rev site-directed mutagenesis primer to generate rv1339 (D180A) catalytic mutant
