# Supplementary figures and images for: Cyclic AMP is a critical mediator of intrinsic drug resistance and fatty acid metabolism in M. tuberculosis
Source: eLife journal article supplement (doi:10.7554/elife.81177), 2023-02-22

WT

$\Delta$ rv3645

$\Delta$ rv3645 + EV

$\Delta$ rv3645 + rv3645

rv1339 OE

rv1339(D180A) OE

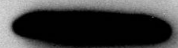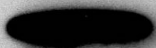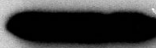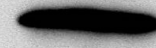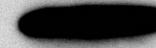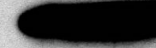

Mce1A

94.4%

105%

59.7%

90.6%

93.3%

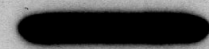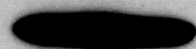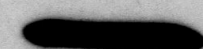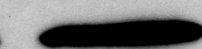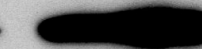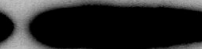

Mce1D

102%

88.6%

62.0%

115%

132%

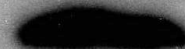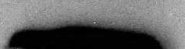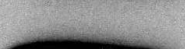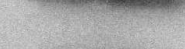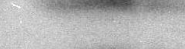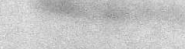

Mce1E

76.3%

93.0%

46.3%

82.0%

96.2%

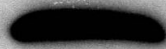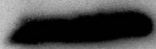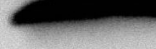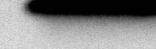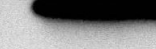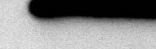

MceG

92.5%

99.2%

68.1%

92.7%

105%

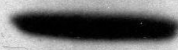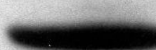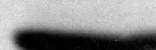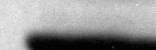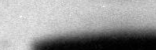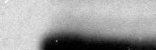

GroEL

100%

99.8%

91.8%

106%

95.3%

107%

Supplement: supp [file elife-81177-supp-v1.zip]

**A**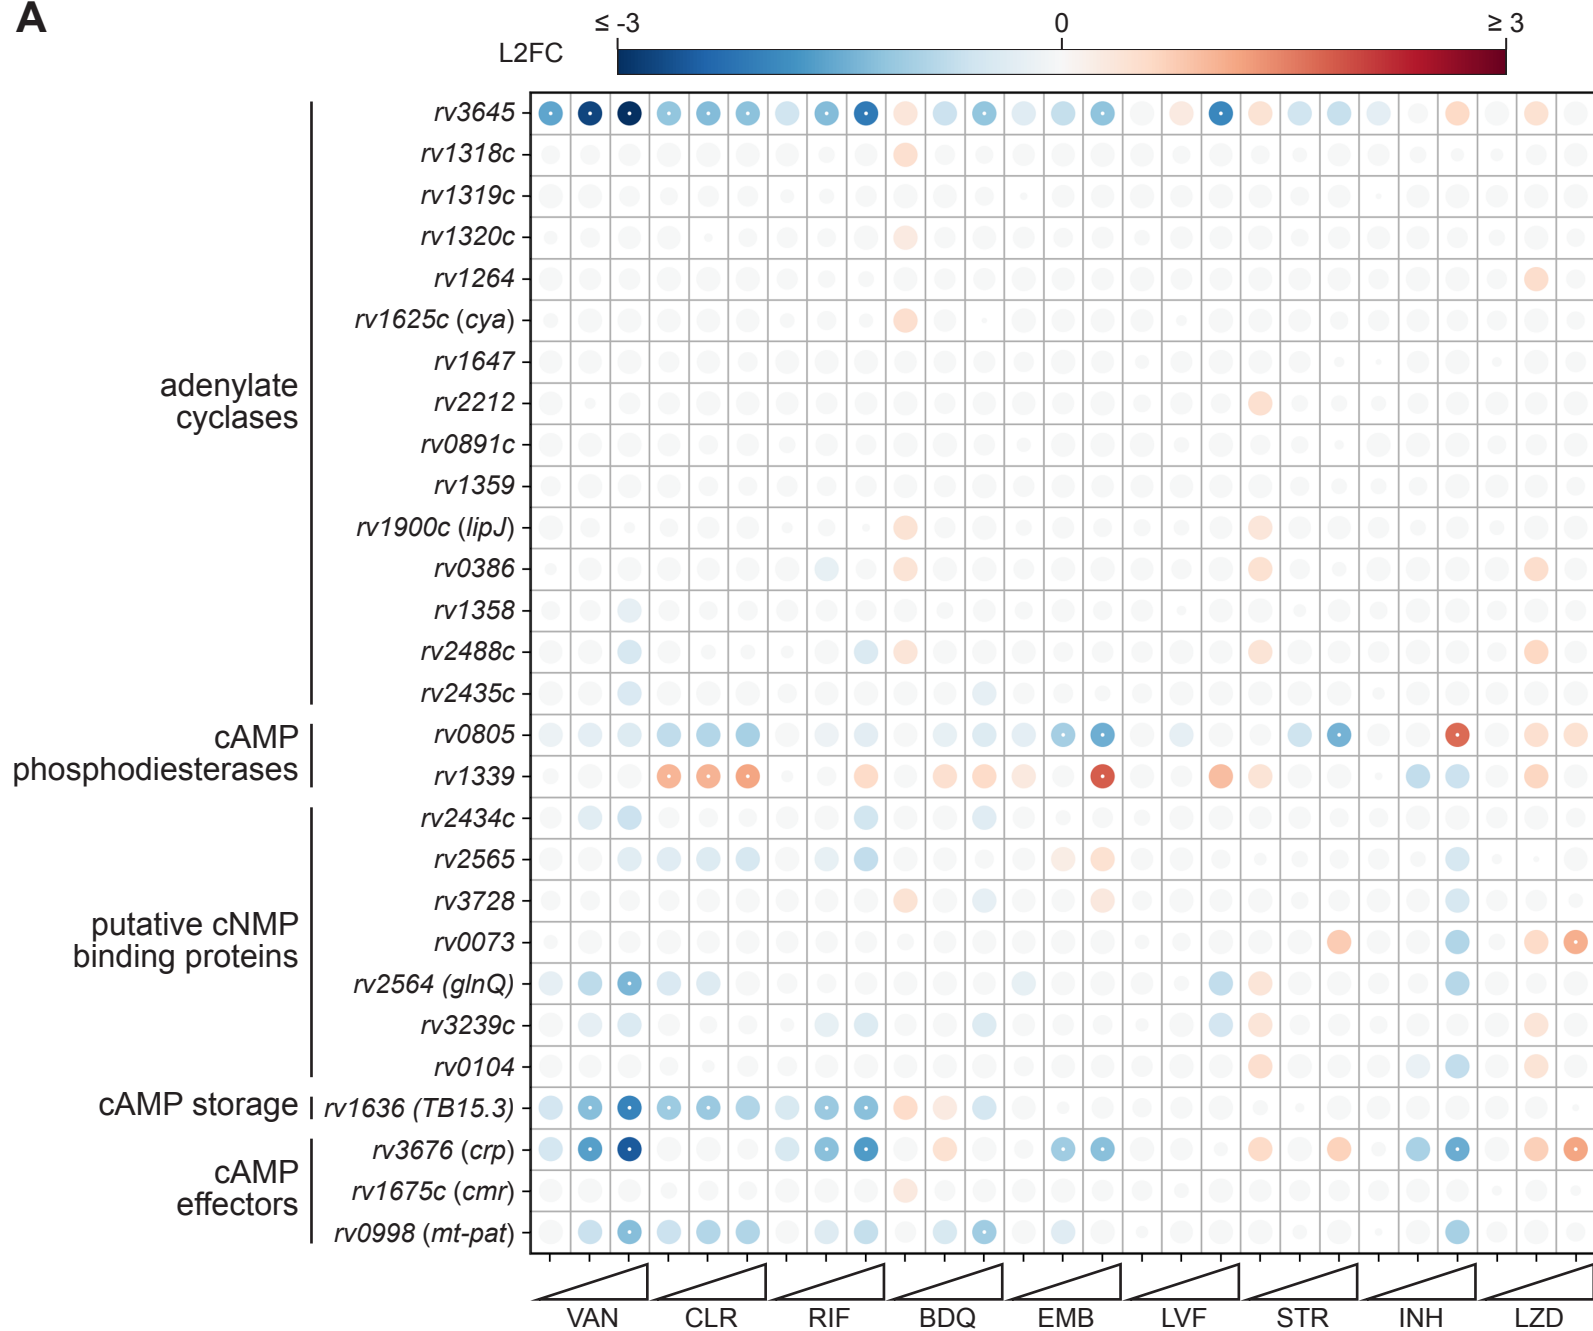**B**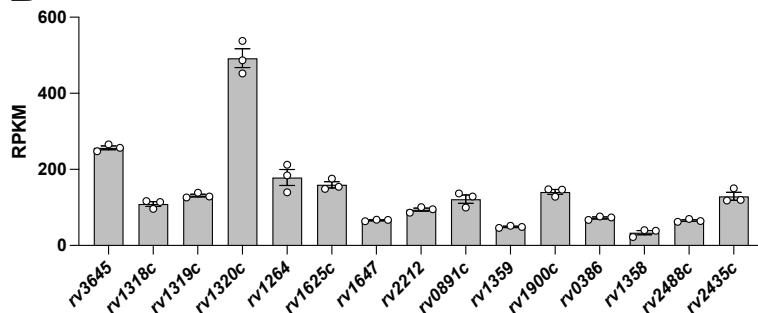**C**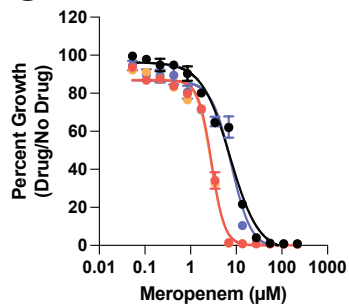**D**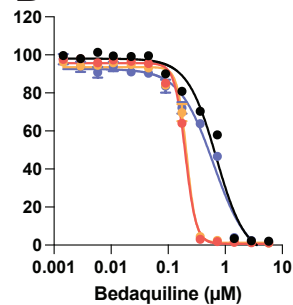**E**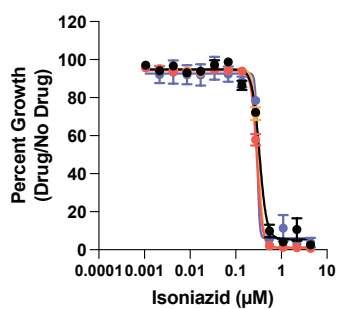**F**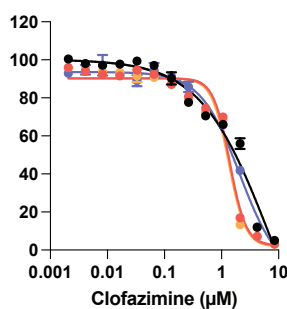**G**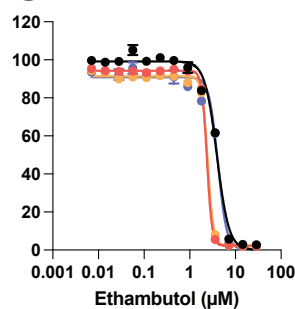**H**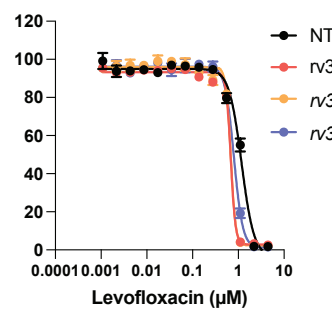

Supplement: supp [file elife-81177-supp-v1.zip]

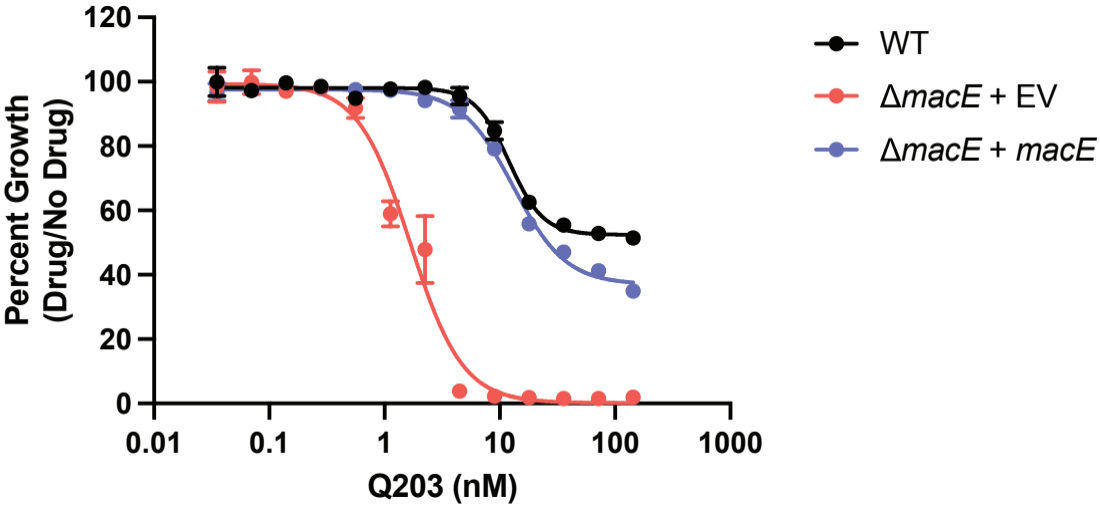

Supplement: supp [file elife-81177-supp-v1.zip]

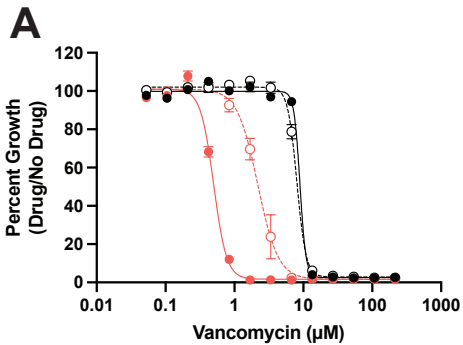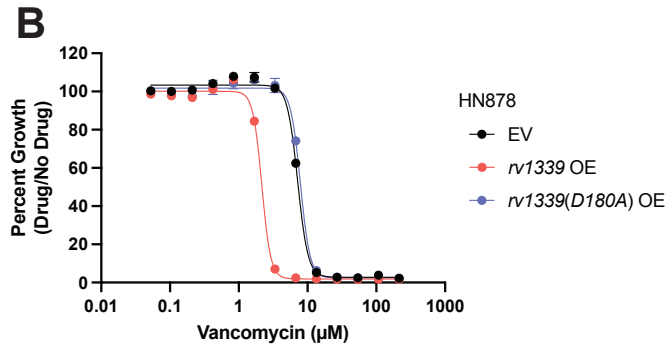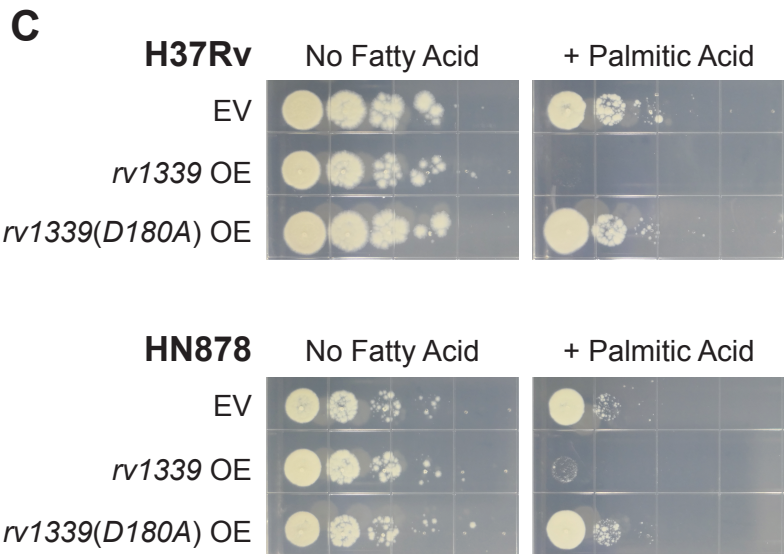

Supplement: supp [file elife-81177-supp-v1.zip]

rv3645

rv3645-6His

rv3645(D411A)-6His

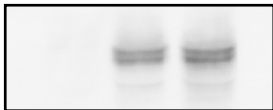

His

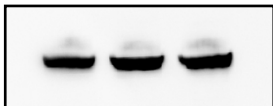

RpoB

Supplement: supp [file elife-81177-supp-v1.zip]

**A**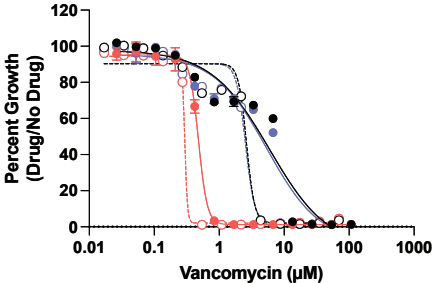**B**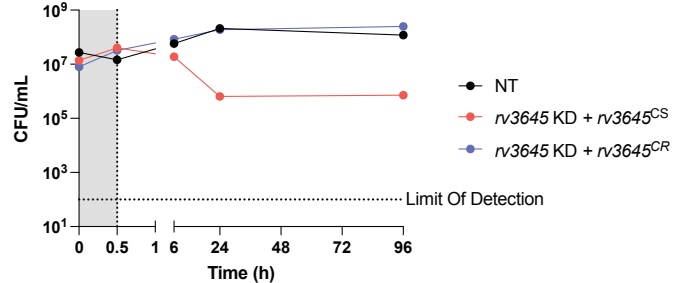

Supplement: supp [file elife-81177-supp-v1.zip]

**A**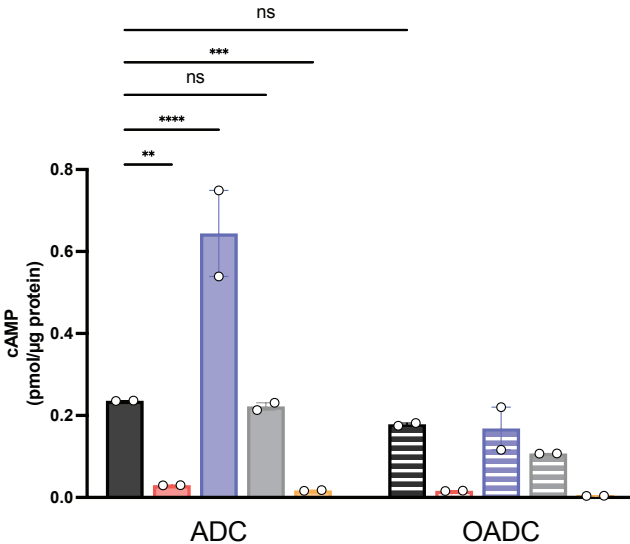**B**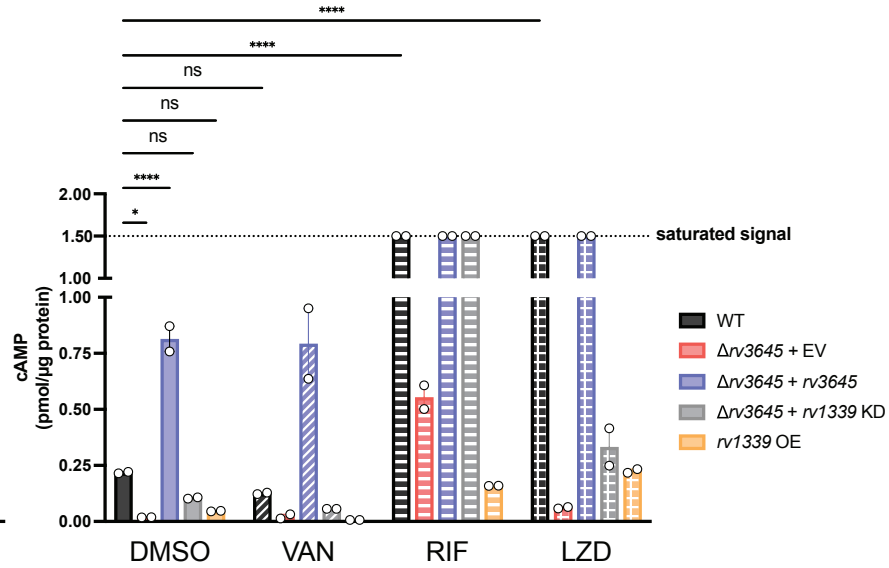

Supplement: supp [file elife-81177-supp-v1.zip]

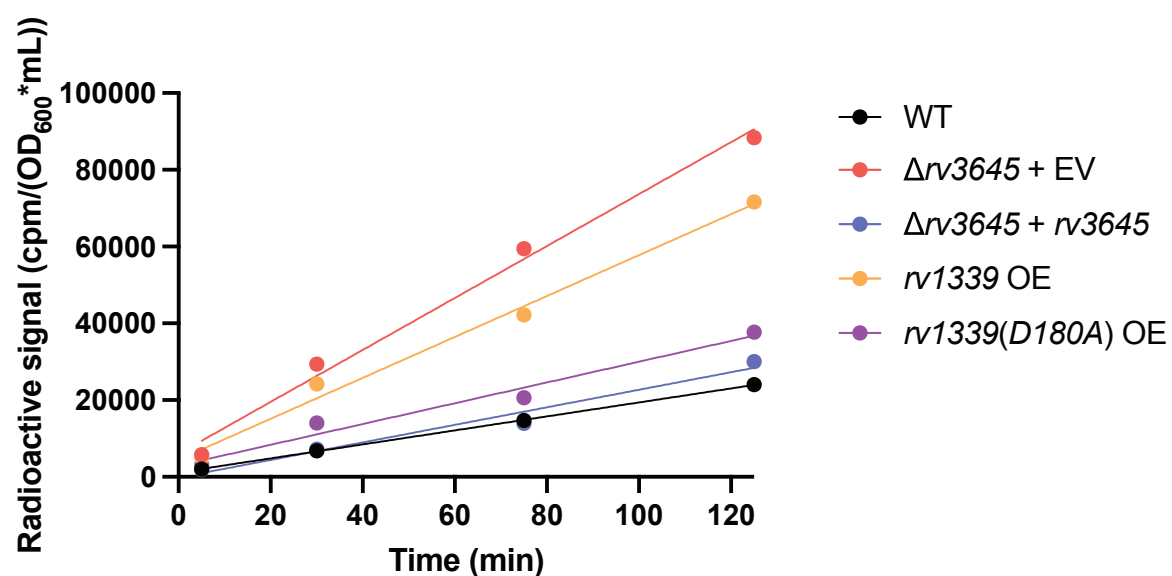

|                          | Slope/Uptake rate | R <sup>2</sup> |
|--------------------------|-------------------|----------------|
| WT                       | 182.2000          | 0.9998         |
| $\Delta rv3645 + EV$     | 676.600           | 0.991          |
| $\Delta rv3645 + rv3645$ | 228.6000          | 0.9716         |
| <i>rv1339</i> OE         | 532.9000          | 0.9903         |
| <i>rv1339(D180A)</i> OE  | 270.6000          | 0.9717         |

Supplement: supp [file elife-81177-supp-v1.zip]

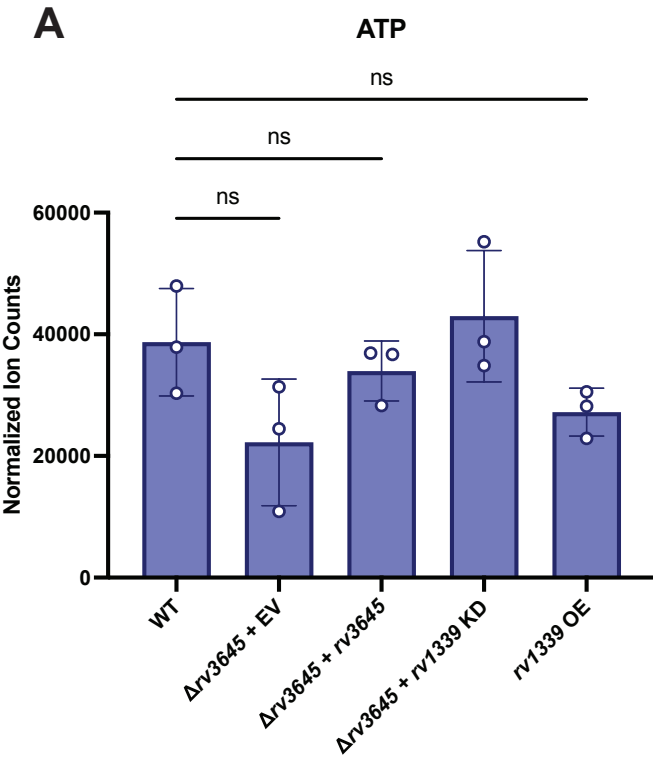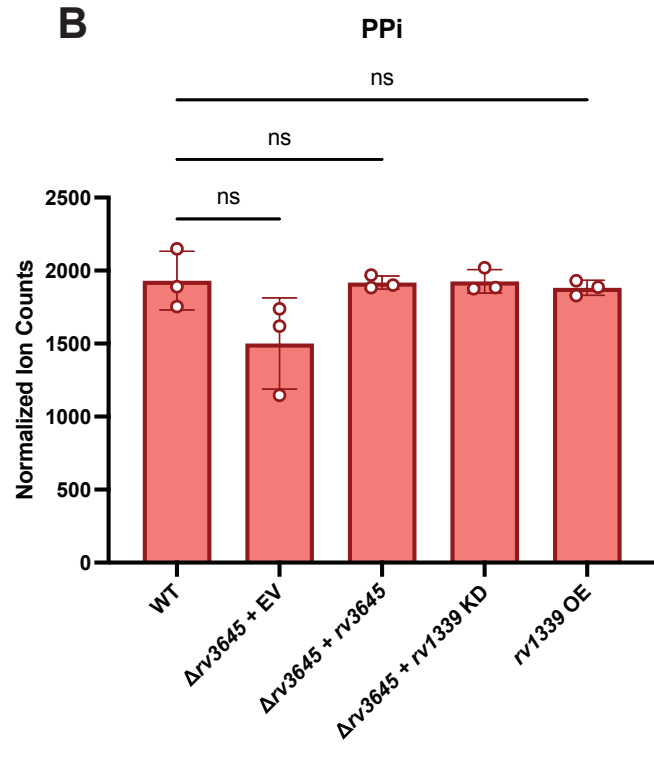

Supplement: supp [file elife-81177-supp-v1.zip]

**A**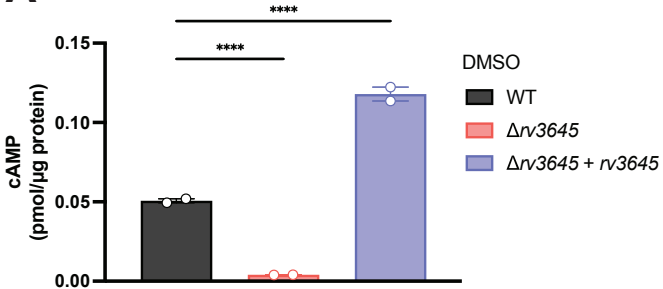**B**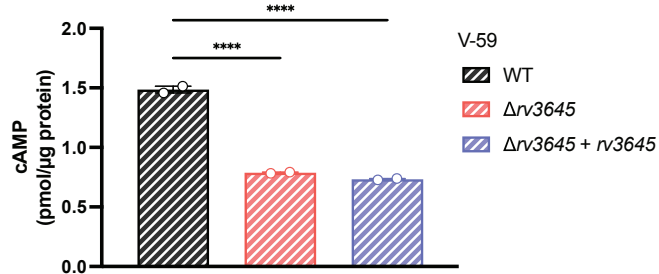

Supplement: supp [file elife-81177-supp-v1.zip]

**A**

NT  
*rv3645* KD + *rv3645*<sup>CS</sup>  
*rv3645* KD + *rv3645*<sup>CR</sup>

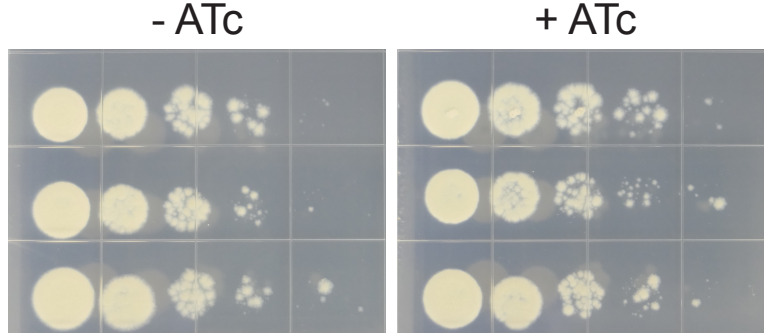**B**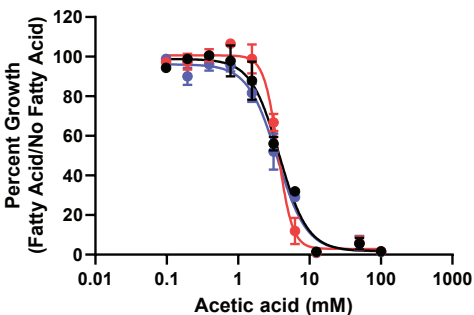**C**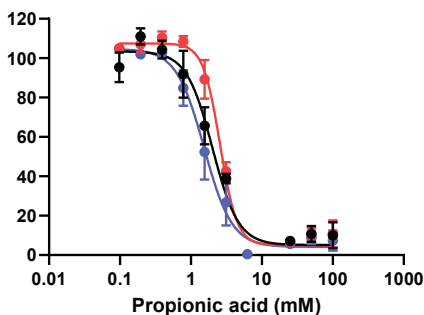**D**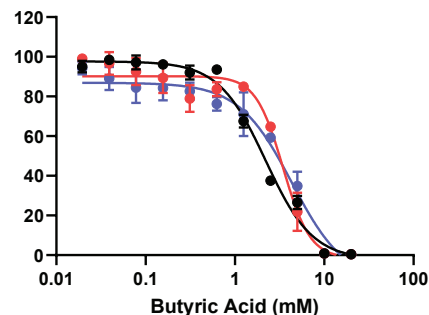**E**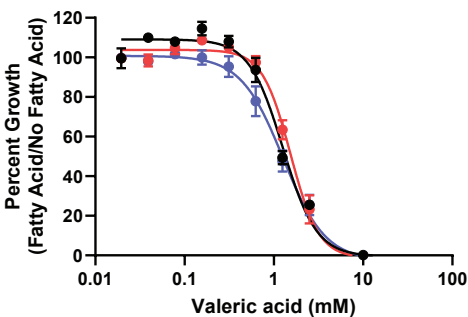**F**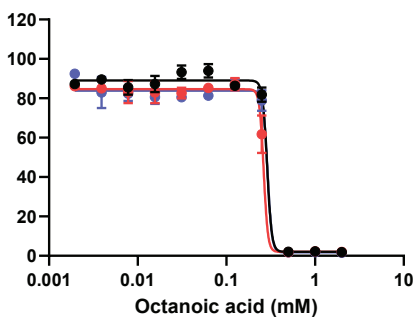**G**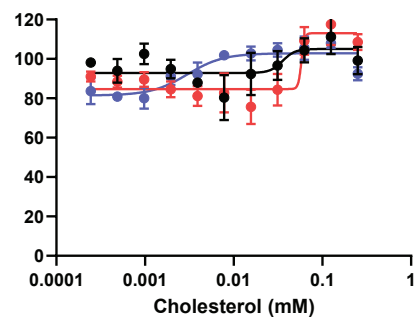

● WT

● *Δrv3645*● *Δrv3645 + rv3645*

Supplement: supp [file elife-81177-supp-v1.zip]
